# Supplementary material
Source: PubMed Central journal article supplement (PMC5290940)
Supplement: 10.1074_M116.756601_jbc.M116.756601-1.pdf [file 10.1074_M116.756601_jbc.M116.756601-1.pdf]

**Supplementary Table 1: List of Pathways identified by Ingenuity Pathway Analysis (IPA).** IPA of the genes shown to be significantly ( $p$  value  $< 0.05$ ) up-regulated or down-regulated  $>2$ -fold at 24 h vs basal was performed. To ensure gene annotations were current, Agilent probe IDs were used to interrogate the Ensembl BioMart database ([www.ensembl.org/biomart/martview](http://www.ensembl.org/biomart/martview)), and the Ensembl gene lists used in pathway and functional analyses (Ingenuity Systems): the Canonical Pathways identified are presented. The  $-\log(p$  value) provides an indication of the probability for the pathway, with the pathways ranked from high (most likely) to low (less likely). The number of genes identified by microarray expression analysis relative to the number of known genes in the identified pathway is expressed as a Ratio. A positive  $z$  score indicates the pathway is activated, zero indicates no inference can be made, whilst a negative score indicates the pathway is inhibited. Molecules refers to the genes (listed by gene name) identified by the microarray known to be involved in the designated Canonical Pathway.

| Ingenuity Canonical Pathways                                                   | $-\log(p$ -value) | Ratio | $z$ -score | Molecules                                                                                                                                        |
|--------------------------------------------------------------------------------|-------------------|-------|------------|--------------------------------------------------------------------------------------------------------------------------------------------------|
| Hepatic Fibrosis / Hepatic Stellate Cell Activation                            | 11.1              | 0.12  | 0          | CXCL8,CTGF,ICAM1,FGF2,COL12A1,BAMBI,MMP13,IL6,PGF,TGFBR2,VEGFA,CCL2,COL6A3,ACTA2,IL1B,LBP,SERPINE1,TNFRSF1B,MMP1,COL3A1,PDGFRB,COL7A1            |
| Granulocyte Adhesion and Diapedesis                                            | 10.5              | 0.119 | 0          | CXCL8,C5AR1,ICAM1,THY1,MMP10,CCL20,MMP13,CXCL5,CXCL6,CLDN23,CCL8,CCL2,IL1RN,SDC2,IL1B,CXCL1,TNFRSF1B,CXCL2,MMP1,HSPB1,CCL7                       |
| Role of IL-17F in Allergic Inflammatory Airway Diseases                        | 9.3               | 0.25  | 3.162      | CXCL8,TRAF3IP2,CCL2,MMP13,IL1B,CXCL1,CXCL5,IL6,CXCL6,IL11,CCL7                                                                                   |
| Role of Macrophages, Fibroblasts and Endothelial Cells in Rheumatoid Arthritis | 8.76              | 0.081 | 0          | CXCL8,SFRP4,SOCS1,C5AR1,ICAM1,FGF2,IL32,MMP13,IRAK3,CEBPB,JAK2,IL6,PGF,VEGFA,FZD4,NFKBIA,PLCE1,TRAF3IP2,CCL2,IL1RN,IL1B,NOS2,TNFRSF1B,MMP1,IRAK2 |
| Role of IL-17A in Arthritis                                                    | 8.3               | 0.179 | 0          | CXCL8,NFKBIA,CCL2,CCL20,MMP13,CXCL1,CXCL5,PTGS2,NOS2,CXCL6,MMP1,CCL7                                                                             |
| IL-17A Signaling in Fibroblasts                                                | 7.83              | 0.257 | 0          | TRAF3IP2,NFKBIA,CCL2,CXCL5,CEBPB,IL6,NFKBIZ,MMP1,CCL7                                                                                            |
| Agranulocyte Adhesion and Diapedesis                                           | 7.55              | 0.095 | 0          | CXCL8,ICAM1,C5AR1,MMP10,CCL20,MMP13,CXCL5,CXCL6,CLDN23,ACTA2,CCL8,CCL2,IL1RN,IL1B,CXCL1,CXCL2,MMP1,CCL7                                          |
| Role of IL-17A in Psoriasis                                                    | 7.13              | 0.462 | 0          | CXCL8,S100A9,CCL20,CXCL1,CXCL5,CXCL6                                                                                                             |
| Atherosclerosis Signaling                                                      | 6.79              | 0.11  | 0          | PLA2G16,CXCL8,ICAM1,ORM1,CCL2,IL1RN,RARRES3,IL1B,MMP13,SERPINA1,IL6,F3,MMP1,COL3A1                                                               |
| NF- $\kappa$ B Signaling                                                       | 6.37              | 0.089 | -0.5       | BMP4,BMP2,TGFBR3,TNFAIP3,IRAK3,NGF,TGFBR2,TNIP1,NFKBIA,GHR,IL1RN,FCER1G,IL1B,MAP3K8,TNFRSF1B,PDGFRB                                              |
| LXR/RXR Activation                                                             | 6.21              | 0.107 | -1.387     | CCL2,ORM1,IL1RN,SAA1,IL1B,SERPINA1,LBP,SAA2,PTGS2,IL6,TNFRSF1B,NOS2,CCL7                                                                         |
| Acute Phase Response Signaling                                                 | 6                 | 0.089 | 2.887      | SOCS1,IL6,CEBPB,SAA2,JAK2,NFKBIA,ORM1,IL1RN,SAA1,CFB,IL1B,SERPINA1,LBP,SERPINE1,TNFRSF1B                                                         |
| IL-6 Signaling                                                                 | 5.97              | 0.102 | 2.309      | VEGFA,CXCL8,SOCS1,NFKBIA,TNFAIP6,IL1RN,IL1B,LBP,CEBPB,JAK2,IL6,TNFRSF1B,HSPB1                                                                    |
| Role of Tissue Factor in Cancer                                                | 5.38              | 0.098 | 0          | VEGFA,CXCL8,FYN,CTGF,PLAUR,MMP13,IL1B,LIMK2,CXCL1,JAK2,F3,MMP1                                                                                   |
| IL-17 Signaling                                                                | 5.27              | 0.118 | 0          | CXCL8,TRAF3IP2,CCL2,CXCL1,CXCL5,CEBPB,JAK2,PTGS2,IL6,NOS2                                                                                        |
| Role of Osteoblasts, Osteoclasts and Chondrocytes in Rheumatoid Arthritis      | 4.93              | 0.069 | 0          | SFRP4,CTSK,BMP4,BMP2,DLX5,MMP13,IL6,GSN,NFKBIA,FZD4,IL1RN,IL1B,TNFRSF1B,BIRC3,MMP1,IL11                                                          |
| Hepatic Cholestasis                                                            | 4.89              | 0.082 | 0          | CXCL8,LIF,IRAK3,IL6,NFKBIA,SLCO3A1,IL1RN,IL1B,LBP,TNFRSF1B,ABCC3,IRAK2,IL11                                                                      |
| TREM1 Signaling                                                                | 4.87              | 0.12  | 3          | CXCL8,TREM1,NOD2,ICAM1,CCL2,IL1B,JAK2,IL6,CCL7                                                                                                   |
| iNOS Signaling                                                                 | 4.72              | 0.159 | 0          | NFKBIA,LBP,JAK2,IRAK3,NOS2,IRF1,IRAK2                                                                                                            |

| Ingenuity Canonical Pathways                                                                          | -log(p-value) | Ratio | z-score | Molecules                                                                         |
|-------------------------------------------------------------------------------------------------------|---------------|-------|---------|-----------------------------------------------------------------------------------|
| HMGB1 Signaling                                                                                       | 4.27          | 0.083 | 3.162   | CXCL8,ICAM1,LIF,CCL2,RHOA,IL1B,IL6,TNFRSF1B,SERPINE1,IL11,PLAT                    |
| Role of Cytokines in Mediating Communication between Immune Cells                                     | 4.12          | 0.13  | 0       | CXCL8,IL26,IL1RN,IL32,IL1B,IL6,IL24                                               |
| Dendritic Cell Maturation                                                                             | 4.08          | 0.068 | 2.309   | STAT4,PLCE1,NFKBIA,ICAM1,IL1RN,FSCN1,IL32,FCER1G,IL1B,IL6,JAK2,TNFRSF1B,COL3A1    |
| Aryl Hydrocarbon Receptor Signaling                                                                   | 4.07          | 0.079 | 0       | TGM2,GSTM1,MGST2,ALDH3A2,NFIA,ALDH1A2,RARB,IL1B,NFIB,IL6,HSPB1                    |
| IL-17A Signaling in Airway Cells                                                                      | 3.94          | 0.104 | 1       | TRAF3IP2,NFKBIA,CCL20,CXCL1,CXCL5,JAK2,IL6,CXCL6                                  |
| UDP-N-acetyl-D-glucosamine Biosynthesis II                                                            | 3.87          | 0.5   | 0       | PGM3,UAP1,GFPT2                                                                   |
| Hematopoiesis from Pluripotent Stem Cells                                                             | 3.57          | 0.128 | 0       | KITLG,CXCL8,LIF,FCER1G,IL6,IL11                                                   |
| Bladder Cancer Signaling                                                                              | 3.57          | 0.092 | 0       | VEGFA,CXCL8,FGF2,THBS1,MMP10,MMP13,MMP1,PGF                                       |
| Differential Regulation of Cytokine Production in Macrophages and T Helper Cells by IL-17A and IL-17F | 3.48          | 0.222 | 0       | CCL2,IL1B,CXCL1,IL6                                                               |
| Inhibition of Angiogenesis by TSP1                                                                    | 3.35          | 0.147 | 0       | VEGFA,TGFBR2,FYN,SDC2,THBS1                                                       |
| IL-8 Signaling                                                                                        | 3.34          | 0.061 | 2.887   | VEGFA,CXCL8,ICAM1,ANGPT1,RHOA,LIMK2,CXCL1,PTGS2,IRAK3,PLD1,PGF,IRAK2              |
| STAT3 Pathway                                                                                         | 3.3           | 0.096 | -1.89   | TGFBR2,SOCS1,GHR,PTPN2,TGFBR3,JAK2,PDGFRB                                         |
| Coagulation System                                                                                    | 3.29          | 0.143 | 0.447   | PLAUR,SERPINA1,SERPINE1,F3,PLAT                                                   |
| Toll-like Receptor Signaling                                                                          | 3.26          | 0.095 | 1.633   | NFKBIA,IL1RN,TNFAIP3,IL1B,LBP,IRAK3,IRAK2                                         |
| Interferon Signaling                                                                                  | 3.23          | 0.139 | -0.447  | SOCS1,IFIT1,PTPN2,JAK2,IRF1                                                       |
| UDP-N-acetyl-D-galactosamine Biosynthesis II                                                          | 2.98          | 0.273 | 0       | HK2,PGM3,UAP1                                                                     |
| LPS/IL-1 Mediated Inhibition of RXR Function                                                          | 2.91          | 0.054 | 1       | GSTM1,MGST2,IL1RN,ALDH3A2,ALDH1A2,ACSL4,IL1B,LBP,TNFRSF1B,ABCC3,ABCC4,ACSL1       |
| Type I Diabetes Mellitus Signaling                                                                    | 2.89          | 0.073 | 1.89    | SOCS1,NFKBIA,FCER1G,IL1B,JAK2,TNFRSF1B,NOS2,IRF1                                  |
| Role of Hypercytokinemia/hyperchemokinaemia in the Pathogenesis of Influenza                          | 2.87          | 0.116 | 0       | CXCL8,CCL2,IL1RN,IL1B,IL6                                                         |
| Glucocorticoid Receptor Signaling                                                                     | 2.85          | 0.049 | 0       | CXCL8,ICAM1,CEBPB,JAK2,IL6,TGFBR2,NFKBIA,CCL2,IL1RN,IL1B,PTGS2,NOS2,SERPINE1,MMP1 |
| Death Receptor Signaling                                                                              | 2.7           | 0.076 | -0.378  | TNFRSF21,NFKBIA,ACTA2,TNFRSF1B,BIRC3,ARHGDI1,HSPB1                                |
| PPAR Signaling                                                                                        | 2.67          | 0.075 | -1.89   | NFKBIA,IL1RN,IL1B,PTGS2,TNFRSF1B,CITED2,PDGFRB                                    |
| TNFR2 Signaling                                                                                       | 2.66          | 0.138 | 0       | NFKBIA,TNFAIP3,TNFRSF1B,BIRC3                                                     |
| Colorectal Cancer Metastasis Signaling                                                                | 2.5           | 0.049 | 2.887   | VEGFA,TGFBR2,FZD4,RHOA,MMP10,MMP13,JAK2,PTGS2,IL6,NOS2,MMP1,PGF                   |
| Citrulline-Nitric Oxide Cycle                                                                         | 2.45          | 0.4   | 0       | ASS1,NOS2                                                                         |

| Ingenuity Canonical Pathways                                                                       | -log(p-value) | Ratio | z-score | Molecules                                                                                   |
|----------------------------------------------------------------------------------------------------|---------------|-------|---------|---------------------------------------------------------------------------------------------|
| RAR Activation                                                                                     | 2.41          | 0.053 | 0       | VEGFA,DHRS3,TNIP1,AKR1C3,BMP2,ALDH1A2,RARB,JAK2,MMP1,CITED2                                 |
| Oncostatin M Signaling                                                                             | 2.4           | 0.118 | 2       | MT2A,MMP13,JAK2,MMP1                                                                        |
| Role of JAK2 in Hormone-like Cytokine Signaling                                                    | 2.4           | 0.118 | 0       | SOCS1,GHR,JAK2,PRLR                                                                         |
| Retinoate Biosynthesis I                                                                           | 2.4           | 0.118 | 0       | DHRS3,AKR1C3,BMP2,ALDH1A2                                                                   |
| Production of Nitric Oxide and Reactive Oxygen Species in Macrophages                              | 2.37          | 0.052 | 3.162   | NFKBIA,ORM1,PPP1R3C,RHOA,SERPINA1,MAP3K8,JAK2,TNFRSF1B,NOS2,IRF1                            |
| Role of Pattern Recognition Receptors in Recognition of Bacteria and Viruses                       | 2.29          | 0.058 | 2       | PTX3,CXCL8,NOD2,C5AR1,LIF,IL1B,IL6,IL11                                                     |
| Prolactin Signaling                                                                                | 2.28          | 0.072 | 1.342   | FYN,SOCS1,CEBPB,JAK2,PRLR,IRF1                                                              |
| Axonal Guidance Signaling                                                                          | 2.2           | 0.038 | 0       | MME,FYN,BMP4,BMP2,MMP10,MMP13,LIMK2,NGF,TUBB2B,PGF,VEGFA,PLCE1,TUBA1A,FZD4,SDC2,SEMA3C,NRP1 |
| Estrogen Biosynthesis                                                                              | 2.19          | 0.103 | 0       | AKR1C3,CYP4B1,CYP4X1,HSD17B14                                                               |
| Inhibition of Matrix Metalloproteases                                                              | 2.19          | 0.103 | 0       | SDC2,MMP10,MMP13,MMP1                                                                       |
| HIF1 $\alpha$ Signaling                                                                            | 2.16          | 0.061 | 0       | VEGFA,MMP10,MMP13,HIF1A,NOS2,MMP1,PGF                                                       |
| Oxidative Ethanol Degradation III                                                                  | 2.14          | 0.143 | 0       | ALDH3A2,ALDH1A2,ACSL1                                                                       |
| Inflammasome pathway                                                                               | 2.14          | 0.143 | 0       | CXCL8,NOD2,IL1B                                                                             |
| p38 MAPK Signaling                                                                                 | 2.12          | 0.06  | 1.134   | TGFBR2,IL1RN,IL1B,IRAK3,TNFRSF1B,HSPB1,IRAK2                                                |
| PPAR $\alpha$ /RXR $\alpha$ Activation                                                             | 2.11          | 0.051 | 0.378   | TGFBR2,PLCE1,GHR,NFKBIA,TGFBR3,IL1B,BCL3,JAK2,IL6                                           |
| Fatty Acid $\alpha$ -oxidation                                                                     | 2.08          | 0.136 | 0       | ALDH3A2,ALDH1A2,PTGS2                                                                       |
| Differential Regulation of Cytokine Production in Intestinal Epithelial Cells by IL-17A and IL-17F | 2.03          | 0.13  | 0       | CCL2,IL1B,CXCL1                                                                             |
| Putrescine Degradation III                                                                         | 2.03          | 0.13  | 0       | ALDH3A2,ALDH1A2,SAT1                                                                        |
| Airway Pathology in Chronic Obstructive Pulmonary Disease                                          | 2.02          | 0.25  | 0       | CXCL8,MMP1                                                                                  |
| IL-10 Signaling                                                                                    | 2             | 0.074 | 0       | NFKBIA,IL1RN,IL1B,LBP,IL6                                                                   |
| Role of JAK1, JAK2 and TYK2 in Interferon Signaling                                                | 1.98          | 0.125 | 0       | SOCS1,PTPN2,JAK2                                                                            |
| IL-17A Signaling in Gastric Cells                                                                  | 1.93          | 0.12  | 0       | CXCL8,CCL20,CXCL1                                                                           |
| Role of JAK family kinases in IL-6-type Cytokine Signaling                                         | 1.93          | 0.12  | 0       | SOCS1,JAK2,IL6                                                                              |
| Ethanol Degradation IV                                                                             | 1.93          | 0.12  | 0       | ALDH3A2,ALDH1A2,ACSL1                                                                       |
| GDP-glucose Biosynthesis                                                                           | 1.92          | 0.222 | 0       | HK2,PGM3                                                                                    |
| T Helper Cell Differentiation                                                                      | 1.88          | 0.069 | 0       | STAT4,TGFBR2,FCER1G,IL6,TNFRSF1B                                                            |
| Graft-versus-Host Disease Signaling                                                                | 1.87          | 0.083 | 0       | IL1RN,FCER1G,IL1B,IL6                                                                       |

| Ingenuity Canonical Pathways                                | -log(p-value) | Ratio | z-score | Molecules                                        |
|-------------------------------------------------------------|---------------|-------|---------|--------------------------------------------------|
| Antioxidant Action of Vitamin C                             | 1.84          | 0.058 | 0       | PLA2G16,PLCE1,NFKBIA,RARRES3,JAK2,PLD1           |
| IL-15 Production                                            | 1.83          | 0.111 | 0       | JAK2,IL6,IRF1                                    |
| Glucose and Glucose-1-phosphate Degradation                 | 1.82          | 0.2   | 0       | HK2,PGM3                                         |
| Adipogenesis pathway                                        | 1.82          | 0.052 | 0       | EBF1,BMP4,FZD4,FGF2,BMP2,HIF1A,CEBPB             |
| Glycogen Degradation II                                     | 1.74          | 0.182 | 0       | PGM3,TYMP                                        |
| Semaphorin Signaling in Neurons                             | 1.73          | 0.076 | 0       | FYN,RHOA,LIMK2,NRP1                              |
| Germ Cell-Sertoli Cell Junction Signaling                   | 1.72          | 0.046 | 0       | TGFBR2,TUBA1A,ACTA2,RHOA,MAP3K8,LIMK2,GSN,TUBB2B |
| Human Embryonic Stem Cell Pluripotency                      | 1.68          | 0.049 | 0       | TGFBR2,BMP4,FZD4,FGF2,BMP2,NGF,PDGFRB            |
| JAK/Stat Signaling                                          | 1.66          | 0.06  | 1.342   | STAT4,SOCS1,CEBPB,JAK2,IL6                       |
| IL-12 Signaling and Production in Macrophages               | 1.64          | 0.048 | 0       | STAT4,ORM1,SERPINA1,MAP3K8,CEBPB,NOS2,IRF1       |
| Fatty Acid Activation                                       | 1.6           | 0.154 | 0       | ACSL4,ACSL1                                      |
| Glycogen Degradation III                                    | 1.6           | 0.154 | 0       | PGM3,TYMP                                        |
| TGF- $\beta$ Signaling                                      | 1.58          | 0.058 | 0       | TGFBR2,BMP4,BMP2,SERPINE1,TGIF1                  |
| Pancreatic Adenocarcinoma Signaling                         | 1.58          | 0.051 | 2.236   | VEGFA,TGFBR2,JAK2,PTGS2,PLD1,PGF                 |
| MSP-RON Signaling Pathway                                   | 1.57          | 0.068 | 0       | CCL2,ACTA2,JAK2,NOS2                             |
| Communication between Innate and Adaptive Immune Cells      | 1.54          | 0.056 | 0       | CXCL8,IL1RN,FCER1G,IL1B,IL6                      |
| Androgen Biosynthesis                                       | 1.54          | 0.143 | 0       | AKR1C3,HSD17B14                                  |
| Superpathway of Citrulline Metabolism                       | 1.54          | 0.143 | 0       | ASS1,NOS2                                        |
| Altered T Cell and B Cell Signaling in Rheumatoid Arthritis | 1.53          | 0.056 | 0       | CD79B,IL1RN,FCER1G,IL1B,IL6                      |
| Regulation of the Epithelial-Mesenchymal Transition Pathway | 1.52          | 0.042 | 0       | TGFBR2,FZD4,FGF2,ZEB2,TWIST1,HIF1A,JAK2,PDGFRB   |
| Phospholipases                                              | 1.5           | 0.065 | 0       | PLA2G16,PLCE1,RARRES3,PLD1                       |
| Factors Promoting Cardiogenesis in Vertebrates              | 1.49          | 0.054 | 0       | TGFBR2,BMP4,FZD4,TGFBR3,BMP2                     |
| Methylglyoxal Degradation III                               | 1.48          | 0.133 | 0       | AKR1C3,AKR1B1                                    |
| PCP pathway                                                 | 1.48          | 0.064 | 0       | FZD4,SDC2,PRICKLE1,HSPB1                         |
| tRNA Splicing                                               | 1.47          | 0.081 | 0       | PDE7B,PDE5A,PDE1A                                |
| Ethanol Degradation II                                      | 1.47          | 0.081 | 0       | ALDH3A2,ALDH1A2,ACSL1                            |
| FXR/RXR Activation                                          | 1.45          | 0.048 | 0       | ORM1,IL1RN,SAA1,IL1B,SERPINA1,SAA2               |
| Type II Diabetes Mellitus Signaling                         | 1.44          | 0.047 | 0       | SOCS1,NFKBIA,ACSL4,CEBPB,TNFRSF1B,ACSL1          |

| Ingenuity Canonical Pathways                            | -log(p-value) | Ratio | z-score | Molecules                                                     |
|---------------------------------------------------------|---------------|-------|---------|---------------------------------------------------------------|
| ILK Signaling                                           | 1.44          | 0.041 | 1.342   | VEGFA,ACTA2,BMP2,RHOU,HIF1A,PTGS2,NOS2,PGF                    |
| PXR/RXR Activation                                      | 1.44          | 0.062 | 0       | GSTM1,ALDH3A2,IL6,ABCC3                                       |
| G-Protein Coupled Receptor Signaling                    | 1.43          | 0.037 | 0       | FYN,RGS2,GPER1,NFKBIA,PDE7B,RGS16,PDE5A,MAP3K8,PDE1A,ADORA2A  |
| Chondroitin Sulfate Degradation (Metazoa)               | 1.43          | 0.125 | 0       | HYAL1,CD44                                                    |
| Spermine Biosynthesis                                   | 1.42          | 0.5   | 0       | SMS                                                           |
| Taurine Biosynthesis                                    | 1.42          | 0.5   | 0       | CDO1                                                          |
| Glycine Degradation (Creatine Biosynthesis)             | 1.42          | 0.5   | 0       | GAMT                                                          |
| Glycine Biosynthesis I                                  | 1.42          | 0.5   | 0       | SHMT1                                                         |
| Eicosanoid Signaling                                    | 1.4           | 0.06  | 0       | PLA2G16,AKR1C3,RARRES3,PTGS2                                  |
| TR/RXR Activation                                       | 1.39          | 0.051 | 0       | AKR1C3,COL6A3,BCL3,HIF1A,DIO2                                 |
| $\gamma$ -linolenate Biosynthesis II (Animals)          | 1.38          | 0.118 | 0       | ACSL4,ACSL1                                                   |
| Dermatan Sulfate Degradation (Metazoa)                  | 1.38          | 0.118 | 0       | HYAL1,CD44                                                    |
| Mitochondrial L-carnitine Shuttle Pathway               | 1.38          | 0.118 | 0       | ACSL4,ACSL1                                                   |
| MIF Regulation of Innate Immunity                       | 1.36          | 0.073 | 0       | NFKBIA,PTGS2,NOS2                                             |
| Wnt/ $\beta$ -catenin Signaling                         | 1.34          | 0.041 | 1.633   | TGFBR2,SFRP4,FZD4,APPL2,TGFBR3,RARB,CD44                      |
| Tec Kinase Signaling                                    | 1.33          | 0.041 | 1.89    | TNFRSF21,STAT4,FYN,ACTA2,RHOU,FCER1G,JAK2                     |
| Caveolar-mediated Endocytosis Signaling                 | 1.32          | 0.056 | 0       | FYN,ACTA2,ITGA11,ITGA10                                       |
| Role of MAPK Signaling in the Pathogenesis of Influenza | 1.3           | 0.056 | 0       | PLA2G16,CCL2,RARRES3,PTGS2                                    |
| Xenobiotic Metabolism Signaling                         | 1.29          | 0.035 | 0       | GSTM1,MGST2,ALDH3A2,ALDH1A2,IL1B,MAP3K8,IL6,NOS2,ABCC3,CITED2 |
| Leukocyte Extravasation Signaling                       | 1.29          | 0.038 | 1.633   | CLDN23,ICAM1,ACTA2,CD44,MMP13,MMP10,THY1,MMP1                 |
| Histamine Degradation                                   | 1.29          | 0.105 | 0       | ALDH3A2,ALDH1A2                                               |
| Ephrin Receptor Signaling                               | 1.29          | 0.04  | 1       | VEGFA,FYN,ANGPT1,SDC2,LIMK2,JAK2,PGF                          |
| Mouse Embryonic Stem Cell Pluripotency                  | 1.27          | 0.047 | -0.447  | BMP4,LIF,FZD4,JAK2,ID3                                        |
| Cardiomyocyte Differentiation via BMP Receptors         | 1.25          | 0.1   | 0       | BMP4,BMP2                                                     |
| The Visual Cycle                                        | 1.25          | 0.1   | 0       | DHRS3,AKR1C3                                                  |
| Thyronamine and Iodothyronamine Metabolism              | 1.25          | 0.333 | 0       | DIO2                                                          |
| Tetrahydrobiopterin Biosynthesis I                      | 1.25          | 0.333 | 0       | GCH1                                                          |

| Ingenuity Canonical Pathways                                | -log(p-value) | Ratio | z-score | Molecules                                     |
|-------------------------------------------------------------|---------------|-------|---------|-----------------------------------------------|
| Thyroid Hormone Metabolism I (via Deiodination)             | 1.25          | 0.333 | 0       | DIO2                                          |
| Tetrahydrobiopterin Biosynthesis II                         | 1.25          | 0.333 | 0       | GCH1                                          |
| Sertoli Cell-Sertoli Cell Junction Signaling                | 1.24          | 0.039 | 0       | CLDN23,TUBA1A,ACTA2,TGFBR3,MAP3K8,NOS2,TUBB2B |
| CD40 Signaling                                              | 1.2           | 0.051 | 0       | ICAM1,NFKBIA,TNFAIP3,PTGS2                    |
| Glutathione Redox Reactions I                               | 1.18          | 0.091 | 0       | GPX3,MGST2                                    |
| TNFR1 Signaling                                             | 1.17          | 0.061 | 0       | NFKBIA,TNFAIP3,BIRC3                          |
| Relaxin Signaling                                           | 1.15          | 0.04  | 0       | VEGFA,NFKBIA,PDE7B,PDE5A,PDE1A,NOS2           |
| Spermine and Spermidine Degradation I                       | 1.13          | 0.25  | 0       | SAT1                                          |
| Phenylethylamine Degradation I                              | 1.13          | 0.25  | 0       | ALDH3A2                                       |
| L-cysteine Degradation I                                    | 1.13          | 0.25  | 0       | CDO1                                          |
| Acetate Conversion to Acetyl-CoA                            | 1.13          | 0.25  | 0       | ACSL1                                         |
| NRF2-mediated Oxidative Stress Response                     | 1.1           | 0.036 | 0       | GSTM1,MGST2,ACTA2,DNAJB9,ABCC4,MAFF,FTH1      |
| Bupropion Degradation                                       | 1.08          | 0.08  | 0       | CYP4B1,CYP4X1                                 |
| Tryptophan Degradation X (Mammalian, via Tryptamine)        | 1.08          | 0.08  | 0       | ALDH3A2,ALDH1A2                               |
| HIPPO signaling                                             | 1.08          | 0.047 | 0       | WWC1,PPP1R3C,CD44,AMOT                        |
| Unfolded protein response                                   | 1.07          | 0.056 | 0       | CD82,CEBPB,DNAJB9                             |
| Role of NANOG in Mammalian Embryonic Stem Cell Pluripotency | 1.06          | 0.041 | 0       | BMP4,LIF,FZD4,BMP2,JAK2                       |
| Phospholipase C Signaling                                   | 1.05          | 0.034 | 0       | TGM2,FYN,PLCE1,CD79B,AHNAK,RHOU,FCER1G,PLD1   |
| Acetone Degradation I (to Methylglyoxal)                    | 1.05          | 0.077 | 0       | CYP4B1,CYP4X1                                 |
| Trehalose Degradation II (Trehalase)                        | 1.03          | 0.2   | 0       | HK2                                           |
| Galactose Degradation I (Leloir Pathway)                    | 1.03          | 0.2   | 0       | GALM                                          |
| dTMP De Novo Biosynthesis                                   | 1.03          | 0.2   | 0       | SHMT1                                         |
| Folate Polyglutamylation                                    | 1.03          | 0.2   | 0       | SHMT1                                         |
| Crosstalk between Dendritic Cells and Natural Killer Cells  | 1.03          | 0.045 | 0       | ACTA2,FSCN1,IL6,TNFRSF1B                      |
| Sperm Motility                                              | 1.03          | 0.04  | -2      | PLA2G16,SLC16A10,PLCE1,RARRES3,PDE1A          |
| PI3K Signaling in B Lymphocytes                             | 0.995         | 0.039 | 0       | FYN,PLCE1,ATF3,NFKBIA,CD79B                   |
| Glutathione-mediated Detoxification                         | 0.972         | 0.069 | 0       | GSTM1,MGST2                                   |
| Induction of Apoptosis by HIV1                              | 0.964         | 0.05  | 0       | NFKBIA,TNFRSF1B,BIRC3                         |

| Ingenuity Canonical Pathways                         | -log(p-value) | Ratio | z-score | Molecules                             |
|------------------------------------------------------|---------------|-------|---------|---------------------------------------|
| Arginine Biosynthesis IV                             | 0.959         | 0.167 | 0       | ASS1                                  |
| Urea Cycle                                           | 0.959         | 0.167 | 0       | ASS1                                  |
| NAD Biosynthesis III                                 | 0.959         | 0.167 | 0       | NAMPT                                 |
| ERK5 Signaling                                       | 0.917         | 0.048 | 0       | LIF,MAP3K8,NGF                        |
| Fatty Acid $\beta$ -oxidation I                      | 0.901         | 0.063 | 0       | ACSL4,ACSL1                           |
| Superpathway of Serine and Glycine Biosynthesis I    | 0.896         | 0.143 | 0       | SHMT1                                 |
| Hypoxia Signaling in the Cardiovascular System       | 0.887         | 0.046 | 0       | VEGFA,NFKBIA,HIF1A                    |
| Cholecystokinin/Gastrin-mediated Signaling           | 0.885         | 0.04  | 0       | IL1RN,RHOU,IL1B,PTGS2                 |
| RANK Signaling in Osteoclasts                        | 0.885         | 0.04  | 0       | NFKBIA,MAP3K8,GSN,BIRC3               |
| MIF-mediated Glucocorticoid Regulation               | 0.879         | 0.061 | 0       | NFKBIA,PTGS2                          |
| VEGF Signaling                                       | 0.863         | 0.039 | 1       | VEGFA,ACTA2,HIF1A,PGF                 |
| TWEAK Signaling                                      | 0.858         | 0.059 | 0       | NFKBIA,BIRC3                          |
| Remodeling of Epithelial Adherens Junctions          | 0.845         | 0.044 | 0       | TUBA1A,ACTA2,TUBB2B                   |
| Salvage Pathways of Pyrimidine Deoxyribonucleotides  | 0.842         | 0.125 | 0       | TYMP                                  |
| Ovarian Cancer Signaling                             | 0.838         | 0.035 | 0       | VEGFA,FZD4,CD44,PTGS2,PGF             |
| B Cell Development                                   | 0.838         | 0.057 | 0       | IL7R,CD79B                            |
| Dopamine Degradation                                 | 0.838         | 0.057 | 0       | ALDH3A2,ALDH1A2                       |
| Stearate Biosynthesis I (Animals)                    | 0.838         | 0.057 | 0       | ACSL4,ACSL1                           |
| IGF-1 Signaling                                      | 0.831         | 0.038 | 0       | SOCS1,CTGF,NOV,JAK2                   |
| Epithelial Adherens Junction Signaling               | 0.821         | 0.034 | 0       | TGFBR2,TUBA1A,ACTA2,TGFBR3,TUBB2B     |
| Glioma Invasiveness Signaling                        | 0.819         | 0.043 | 0       | CD44,RHOU,PLAUR                       |
| Endothelin-1 Signaling                               | 0.816         | 0.032 | 0       | PLA2G16,PLCE1,RARRES3,PTGS2,NOS2,PLD1 |
| Role of JAK1 and JAK3 in $\gamma$ Cytokine Signaling | 0.806         | 0.042 | 0       | IL7R,SOCS1,JAK2                       |
| Chemokine Signaling                                  | 0.806         | 0.042 | 0       | CCL2,LIMK2,CCL7                       |
| Complement System                                    | 0.799         | 0.054 | 0       | C5AR1,CFB                             |
| Prostanoid Biosynthesis                              | 0.795         | 0.111 | 0       | PTGS2                                 |
| Sucrose Degradation V (Mammalian)                    | 0.795         | 0.111 | 0       | GALM                                  |
| Pregnenolone Biosynthesis                            | 0.795         | 0.111 | 0       | CYP26B1                               |
| Folate Transformations I                             | 0.795         | 0.111 | 0       | SHMT1                                 |

| Ingenuity Canonical Pathways                                         | -log(p-value) | Ratio | z-score | Molecules                                                        |
|----------------------------------------------------------------------|---------------|-------|---------|------------------------------------------------------------------|
| Basal Cell Carcinoma Signaling                                       | 0.793         | 0.042 | 0       | BMP4,FZD4,BMP2                                                   |
| Paxillin Signaling                                                   | 0.761         | 0.035 | 0       | ACTA2,ITGA11,ITGA10,PTPN12                                       |
| Nitric Oxide Signaling in the Cardiovascular System                  | 0.761         | 0.035 | 1       | VEGFA,PDE5A,PDE1A,PGF                                            |
| Glycine Betaine Degradation                                          | 0.753         | 0.1   | 0       | SHMT1                                                            |
| Role of PKR in Interferon Induction and Antiviral Response           | 0.746         | 0.05  | 0       | NFKBIA,IRF1                                                      |
| Thyroid Cancer Signaling                                             | 0.746         | 0.05  | 0       | CXCL1,NGF                                                        |
| Retinol Biosynthesis                                                 | 0.746         | 0.05  | 0       | DHRS3,AKR1C3                                                     |
| Noradrenaline and Adrenaline Degradation                             | 0.746         | 0.05  | 0       | ALDH3A2,ALDH1A2                                                  |
| IL-15 Signaling                                                      | 0.745         | 0.04  | 0       | CXCL8,JAK2,IL6                                                   |
| BMP signaling pathway                                                | 0.745         | 0.04  | 0       | BMP4,BMP2,GREM1                                                  |
| Clathrin-mediated Endocytosis Signaling                              | 0.744         | 0.031 | 0       | VEGFA,ORM1,ACTA2,FGF2,SERPINA1,PGF                               |
| HGF Signaling                                                        | 0.742         | 0.035 | 0       | ELF3,MAP3K8,PTGS2,IL6                                            |
| mTOR Signaling                                                       | 0.738         | 0.03  | 2       | VEGFA,DDIT4,RHO, HIF1A,PLD1,PGF                                  |
| Angiotensin Signaling                                                | 0.733         | 0.039 | 0       | TNIP1,NFKBIA,ANGPT1                                              |
| Molecular Mechanisms of Cancer                                       | 0.731         | 0.027 | 0       | TGFBR2,FYN,BMP4,FZD4,NFKBIA,BMP2,RHO, HIF1A,JAK2,BIRC3           |
| Erythropoietin Signaling                                             | 0.711         | 0.038 | 0       | SOCS1,NFKBIA,JAK2                                                |
| Regulation of IL-2 Expression in Activated and Anergic T Lymphocytes | 0.711         | 0.038 | 0       | TGFBR2,FYN,NFKBIA                                                |
| Gaq Signaling                                                        | 0.709         | 0.031 | 0       | RGS2,NFKBIA,RHO, RGS16,PLD1                                      |
| PTEN Signaling                                                       | 0.707         | 0.034 | 2       | TGFBR2,GHR,TGFBR3,PDGFRB                                         |
| Growth Hormone Signaling                                             | 0.689         | 0.037 | 0       | SOCS1,GHR,JAK2                                                   |
| Hematopoiesis from Multipotent Stem Cells                            | 0.682         | 0.083 | 0       | KITLG                                                            |
| Histidine Degradation VI                                             | 0.682         | 0.083 | 0       | CYP26B1                                                          |
| phagosome formation                                                  | 0.681         | 0.033 | 0       | PLCE1,RHO, FCER1G,FCAMR                                          |
| PI3K/AKT Signaling                                                   | 0.665         | 0.032 | 2       | NFKBIA,MAP3K8,JAK2,PTGS2                                         |
| Small Cell Lung Cancer Signaling                                     | 0.659         | 0.036 | 0       | NFKBIA,RARB,PTGS2                                                |
| Protein Kinase A Signaling                                           | 0.657         | 0.026 | -1.667  | TGFBR2,PLCE1,NFKBIA,PDE7B,PTPN2,PPP1R3C,PDE5A,PTGS2,PDE1A,PTPN12 |
| Gap Junction Signaling                                               | 0.652         | 0.03  | 0       | PLCE1,NOV,TUBA1A,ACTA2,TUBB2B                                    |
| Choline Biosynthesis III                                             | 0.651         | 0.077 | 0       | PLD1                                                             |
| Bile Acid Biosynthesis, Neutral Pathway                              | 0.651         | 0.077 | 0       | AKR1C3                                                           |
| Leukotriene Biosynthesis                                             | 0.623         | 0.071 | 0       | MGST2                                                            |



| Ingenuity Canonical Pathways                                            | -log(p-value) | Ratio | z-score | Molecules                            |
|-------------------------------------------------------------------------|---------------|-------|---------|--------------------------------------|
| Phenylalanine Degradation IV (Mammalian, via Side Chain)                | 0.623         | 0.071 | 0       | ALDH3A2                              |
| VEGF Family Ligand-Receptor Interactions                                | 0.62          | 0.034 | 0       | VEGFA,PGF,NRP1                       |
| RhoGDI Signaling                                                        | 0.619         | 0.029 | -1.342  | ACTA2,CD44,RHO,LIMK2,ARHGDI1B        |
| Cellular Effects of Sildenafil (Viagra)                                 | 0.618         | 0.031 | 0       | PLCE1,ACTA2,PDE5A,PDE1A              |
| Apoptosis Signaling                                                     | 0.611         | 0.034 | 0       | NFKBIA,TNFRSF1B,BIRC3                |
| Integrin Signaling                                                      | 0.608         | 0.027 | -0.816  | FYN,ACTA2,ITGA11,RHO,ITGA10,GSN      |
| PKC $\theta$ Signaling in T Lymphocytes                                 | 0.603         | 0.03  | 2       | FYN,NFKBIA,FCER1G,MAP3K8             |
| cAMP-mediated signaling                                                 | 0.597         | 0.027 | -1.633  | RGS2,GPER1,PDE7B,PDE5A,PDE1A,ADORA2A |
| Regulation of Actin-based Motility by Rho                               | 0.593         | 0.033 | 0       | ACTA2,RHO,GSN                        |
| Acute Myeloid Leukemia Signaling                                        | 0.593         | 0.033 | 0       | KITLG,IDH1,PIM2                      |
| IL-1 Signaling                                                          | 0.593         | 0.033 | 0       | NFKBIA,IRAK3,IRAK2                   |
| Cardiac $\beta$ -adrenergic Signaling                                   | 0.582         | 0.03  | -1      | PDE7B,PPP1R3C,PDE5A,PDE1A            |
| CD27 Signaling in Lymphocytes                                           | 0.578         | 0.039 | 0       | NFKBIA,MAP3K8                        |
| Fc $\gamma$ Receptor-mediated Phagocytosis in Macrophages and Monocytes | 0.576         | 0.032 | 0       | FYN,ACTA2,PLD1                       |
| Systemic Lupus Erythematosus Signaling                                  | 0.575         | 0.027 | 0       | CD79B,IL1RN,FCER1G,IL1B,IL6,PIM2     |
| Extrinsic Prothrombin Activation Pathway                                | 0.573         | 0.063 | 0       | F3                                   |
| Ubiquinol-10 Biosynthesis (Eukaryotic)                                  | 0.573         | 0.063 | 0       | CYP26B1                              |
| Nicotine Degradation III                                                | 0.555         | 0.037 | 0       | CYP4B1,CYP4X1                        |
| CTLA4 Signaling in Cytotoxic T Lymphocytes                              | 0.527         | 0.03  | 0       | FYN,FCER1G,JAK2                      |
| Cardiac Hypertrophy Signaling                                           | 0.524         | 0.026 | 0       | TGFBR2,PLCE1,RHO,MAP3K8,IL6,HSPB1    |
| Wnt/Ca <sup>+</sup> pathway                                             | 0.523         | 0.035 | 0       | PLCE1,FZD4                           |
| phagosome maturation                                                    | 0.522         | 0.028 | 0       | ATP6V0E2,CTSK,TUBA1A,TUBB2B          |
| Synaptic Long Term Depression                                           | 0.51          | 0.027 | -1      | PLA2G16,PLCE1,RARRES3,NOS2           |
| Role of NFAT in Cardiac Hypertrophy                                     | 0.508         | 0.026 | 0.447   | TGFBR2,PLCE1,LIF,IL6,IL11            |
| Retinoic acid Mediated Apoptosis Signaling                              | 0.484         | 0.033 | 0       | RARB,IRF1                            |

| <b>Ingenuity Canonical Pathways</b>                          | <b>-log(p-value)</b> | <b>Ratio</b> | <b>z-score</b> | <b>Molecules</b>              |
|--------------------------------------------------------------|----------------------|--------------|----------------|-------------------------------|
| Activation of IRF by Cytosolic Pattern Recognition Receptors | 0.474                | 0.032        | 0              | NFKBIA,IL6                    |
| Melatonin Degradation I                                      | 0.474                | 0.032        | 0              | CYP4B1,CYP4X1                 |
| Nicotine Degradation II                                      | 0.465                | 0.032        | 0              | CYP4B1,CYP4X1                 |
| Polyamine Regulation in Colon Cancer                         | 0.459                | 0.046        | 0              | SAT1                          |
| Pyridoxal 5'-phosphate Salvage Pathway                       | 0.457                | 0.031        | 0              | MAP3K8,LIMK2                  |
| Gas Signaling                                                | 0.456                | 0.028        | 0              | RGS2,GPER1,ADORA2A            |
| Amyotrophic Lateral Sclerosis Signaling                      | 0.444                | 0.027        | 0              | VEGFA,BIRC3,PGF               |
| Corticotropin Releasing Hormone Signaling                    | 0.444                | 0.027        | 0              | VEGFA,PTGS2,NOS2              |
| Glioblastoma Multiforme Signaling                            | 0.437                | 0.025        | -1             | PLCE1,FZD4,RHO,PDGFRB         |
| Lymphotoxin $\beta$ Receptor Signaling                       | 0.432                | 0.03         | 0              | NFKBIA,CXCL1                  |
| Superpathway of Melatonin Degradation                        | 0.432                | 0.03         | 0              | CYP4B1,CYP4X1                 |
| Tumoricidal Function of Hepatic Natural Killer Cells         | 0.429                | 0.042        | 0              | ICAM1                         |
| Rac Signaling                                                | 0.407                | 0.026        | 0              | CD44,LIMK2,PLD1               |
| Aldosterone Signaling in Epithelial Cells                    | 0.402                | 0.024        | 0              | CRYAB,PLCE1,DNAJB9,HSPB1      |
| Lipid Antigen Presentation by CD1                            | 0.402                | 0.039        | 0              | FCER1G                        |
| Antiproliferative Role of TOB in T Cell Signaling            | 0.402                | 0.039        | 0              | TGFBR2                        |
| Tight Junction Signaling                                     | 0.397                | 0.024        | 0              | TGFBR2,CLDN23,ACTA2,TNFRSF1B  |
| D-myo-inositol (1,4,5)-Trisphosphate Biosynthesis            | 0.389                | 0.037        | 0              | PLCE1                         |
| Sphingosine-1-phosphate Signaling                            | 0.38                 | 0.025        | 0              | PLCE1,RHO,PDGFRB              |
| RhoA Signaling                                               | 0.38                 | 0.025        | 0              | ACTA2,LIMK2,PLD1              |
| Gustation Pathway                                            | 0.38                 | 0.025        | 0              | PDE7B,PDE5A,PDE1A             |
| Serotonin Degradation                                        | 0.379                | 0.027        | 0              | ALDH3A2,ALDH1A2               |
| Intrinsic Prothrombin Activation Pathway                     | 0.366                | 0.035        | 0              | COL3A1                        |
| Dopamine Receptor Signaling                                  | 0.359                | 0.026        | 0              | GCH1,PPP1R3C                  |
| Superpathway of Inositol Phosphate Compounds                 | 0.357                | 0.022        | 0              | FYN,PLCE1,PTPN2,PTPN12,PDGFRB |
| Actin Cytoskeleton Signaling                                 | 0.35                 | 0.022        | 0              | ACTA2,FGF2,LIMK2,LBP,GSN      |

| Ingenuity Canonical Pathways                               | -log(p-value) | Ratio | z-score | Molecules                |
|------------------------------------------------------------|---------------|-------|---------|--------------------------|
| 4-1BB Signaling in T Lymphocytes                           | 0.344         | 0.032 | 0       | NFKBIA                   |
| Superpathway of Methionine Degradation                     | 0.344         | 0.032 | 0       | CDO1                     |
| 14-3-3-mediated Signaling                                  | 0.339         | 0.023 | 0       | PLCE1,TUBA1A,TUBB2B      |
| CD28 Signaling in T Helper Cells                           | 0.335         | 0.023 | 0       | FYN,NFKBIA,FCER1G        |
| p70S6K Signaling                                           | 0.335         | 0.023 | 0       | PLCE1,CD79B,PLD1         |
| Cytotoxic T Lymphocyte-mediated Apoptosis of Target Cells  | 0.334         | 0.031 | 0       | FCER1G                   |
| G Protein Signaling Mediated by Tubby                      | 0.334         | 0.031 | 0       | JAK2                     |
| Pyrimidine Ribonucleotides Interconversion                 | 0.334         | 0.031 | 0       | ENTPD7                   |
| Renal Cell Carcinoma Signaling                             | 0.334         | 0.025 | 0       | VEGFA,HIF1A              |
| Circadian Rhythm Signaling                                 | 0.325         | 0.03  | 0       | BHLHE41                  |
| Role of NFAT in Regulation of the Immune Response          | 0.321         | 0.022 | 0       | FYN,NFKBIA,CD79B,FCER1G  |
| B Cell Receptor Signaling                                  | 0.321         | 0.022 | 0       | EBF1,NFKBIA,CD79B,MAP3K8 |
| 3-phosphoinositide Biosynthesis                            | 0.317         | 0.022 | 0       | FYN,PTPN2,PTPN12,PDGFRB  |
| PEDF Signaling                                             | 0.317         | 0.024 | 0       | NFKBIA,NGF               |
| Pyrimidine Ribonucleotides De Novo Biosynthesis            | 0.316         | 0.029 | 0       | ENTPD7                   |
| Leptin Signaling in Obesity                                | 0.311         | 0.024 | 0       | PLCE1,JAK2               |
| LPS-stimulated MAPK Signaling                              | 0.306         | 0.023 | 0       | NFKBIA,LBP               |
| Insulin Receptor Signaling                                 | 0.291         | 0.021 | 0       | FYN,PPP1R3C,JAK2         |
| OX40 Signaling Pathway                                     | 0.29          | 0.023 | 0       | NFKBIA,FCER1G            |
| IL-4 Signaling                                             | 0.29          | 0.023 | 0       | SOCS1,JAK2               |
| PDGF Signaling                                             | 0.285         | 0.022 | 0       | JAK2,PDGFRB              |
| April Mediated Signaling                                   | 0.282         | 0.026 | 0       | NFKBIA                   |
| Notch Signaling                                            | 0.282         | 0.026 | 0       | DTX2                     |
| ERK/MAPK Signaling                                         | 0.272         | 0.02  | 1       | FYN,ELF3,PPP1R3C,HSPB1   |
| Salvage Pathways of Pyrimidine Ribonucleotides             | 0.27          | 0.022 | 0       | MAP3K8,LIMK2             |
| B Cell Activating Factor Signaling                         | 0.267         | 0.025 | 0       | NFKBIA                   |
| Neuroprotective Role of THOP1 in Alzheimer's Disease       | 0.267         | 0.025 | 0       | MME                      |
| Transcriptional Regulatory Network in Embryonic Stem Cells | 0.267         | 0.025 | 0       | MEIS1                    |

| <b>Ingenuity Canonical Pathways</b>                                | <b>-log(p-value)</b> | <b>Ratio</b> | <b>z-score</b> | <b>Molecules</b>            |
|--------------------------------------------------------------------|----------------------|--------------|----------------|-----------------------------|
| Thyroid Hormone Metabolism II (via Conjugation and/or Degradation) | 0.267                | 0.025        | 0              | DIO2                        |
| Prostate Cancer Signaling                                          | 0.266                | 0.021        | 0              | NFKBIA,NKX3-1               |
| D-myo-inositol-5-phosphate Metabolism                              | 0.261                | 0.02         | 0              | PLCE1,PTPN2,PTPN12          |
| Mechanisms of Viral Exit from Host Cells                           | 0.26                 | 0.024        | 0              | ACTA2                       |
| Breast Cancer Regulation by Stathmin1                              | 0.26                 | 0.02         | 0              | TUBA1A,PPP1R3C,LIMK2,TUBB2B |
| Role of RIG1-like Receptors in Antiviral Innate Immunity           | 0.247                | 0.023        | 0              | NFKBIA                      |
| Serotonin Receptor Signaling                                       | 0.247                | 0.023        | 0              | GCH1                        |
| CDK5 Signaling                                                     | 0.244                | 0.02         | 0              | PPP1R3C,NGF                 |
| FAK Signaling                                                      | 0.244                | 0.02         | 0              | FYN,ACTA2                   |
| Triacylglycerol Biosynthesis                                       | 0.24                 | 0.023        | 0              | PLPP1                       |
| eNOS Signaling                                                     | 0.24                 | 0.019        | 0              | VEGFA,AQP9,PGF              |
| PAK Signaling                                                      | 0.236                | 0.02         | 0              | LIMK2,PDGFRB                |
| IL-9 Signaling                                                     | 0.234                | 0.022        | 0              | BCL3                        |
| Triacylglycerol Degradation                                        | 0.234                | 0.022        | 0              | PNPLA7                      |
| Virus Entry via Endocytic Pathways                                 | 0.232                | 0.02         | 0              | FYN,ACTA2                   |
| Autoimmune Thyroid Disease Signaling                               | 0.223                | 0.021        | 0              | FCER1G                      |
| Primary Immunodeficiency Signaling                                 | 0.217                | 0.021        | 0              | IL7R                        |
| Cancer Drug Resistance By Drug Efflux                              | 0.212                | 0.02         | 0              | PTGS2                       |
| Docosahexaenoic Acid (DHA) Signaling                               | 0.133                | 0.019        | 0              | IL1B                        |
