# Supplementary material
Source: PubMed Central journal article supplement (PMC5290940)
Supplement: 10.1074_M116.756601_jbc.M116.756601-2.pdf [file 10.1074_M116.756601_jbc.M116.756601-2.pdf]

**Supplementary Table 2: List of Regulators identified by Ingenuity Pathway Analysis (IPA).** IPA of the genes shown to be significantly (FDR corrected P value < 0.01) up-regulated or down-regulated >2-fold at 24 h vs basal was performed. To ensure gene annotations were current, Illumina probe IDs were used to interrogate the Ensembl BioMart database ([www.ensembl.org/biomart/martview](http://www.ensembl.org/biomart/martview)), and the Ensembl gene lists used in pathway and functional analyses (Ingenuity Systems): the Regulators identified are presented. The Consistency Score is an heuristic measure used to rank networks within the same global analysis setting, with higher values indicating greater interconnectivity with the highlighted Regulator. Node Total refers to the number of genes identified by IPA for a given Regulator, whilst Target Total refers to the actual number of genes identified from the differential expression test which are listed as Target Molecules (listed by gene name). Diseases and Functions lists the likely involvement for each identified Regulator, where a 100% Relationship indicates the literature strongly supports such an association and 0% reflects a possible indirect association.

| Regulators | Consistency Score | Node Total | Target Total | Target Molecules                                                            | Diseases & Functions         | Known Regulator-Disease/Function Relationship |
|------------|-------------------|------------|--------------|-----------------------------------------------------------------------------|------------------------------|-----------------------------------------------|
| ERK1/2     | 3.474             | 16         | 14           | CCL2,CCL8,CD44,CXCL8,F3,FGF2,ICAM1,IL1B,IL6,NOS2,PTGS2,SERPINE1,TREM1,VEGFA | cell movement of blood cells | 100% (1/1)                                    |
| ERK1/2     | 3.474             | 16         | 14           | CCL2,CCL8,CD44,CXCL8,F3,FGF2,ICAM1,IL1B,IL6,NOS2,PTGS2,SERPINE1,TREM1,VEGFA | leukocyte migration          | 100% (1/1)                                    |
| PTGS2      | 3.333             | 11         | 9            | CCL2,CXCL5,CXCL8,ICAM1,IL1B,IL6,NOS2,TGM2,VEGFA                             | leukocyte migration          | 100% (1/1)                                    |
| IL18       | 3.328             | 15         | 13           | CCL2,CD44,CXCL8,ICAM1,IL1B,IL6,MMP1,MMP13,NFKBIZ,NOS2,PTGS2,TGFB,VEGFA      | activation of cells          | 100% (1/1)                                    |
| IL1B       | 3.317             | 13         | 11           | CCL2,CCL7,CXCL1,CXCL2,CXCL5,CXCL6,CXCL8,LBP,NGF,SAA1,SERPINE1               | chemotaxis of myeloid cells  | 100% (1/1)                                    |
| MYD88      | 3.317             | 13         | 11           | CCL2,CD44,CXCL1,CXCL2,CXCL6,CXCL8,ICAM1,IL1B,IL6,NOS2,SAA1                  | migration of granulocytes    | 100% (1/1)                                    |
| TLR7       | 3.317             | 13         | 11           | CCL2,CCL20,CD38,CD44,CXCL1,CXCL2,CXCL8,FGF2,IL1B,IL6,SOCS1                  | chemotaxis                   | 0% (0/1)                                      |
| TLR7       | 3.317             | 13         | 11           | CCL2,CCL20,CD38,CD44,CXCL1,CXCL2,CXCL8,FGF2,IL1B,IL6,SOCS1                  | homing of cells              | 0% (0/1)                                      |
| IL1B       | 3.182             | 10         | 8            | CCL2,CCL7,CXCL1,CXCL2,CXCL5,CXCL6,CXCL8,LBP                                 | chemotaxis of granulocytes   | 100% (1/1)                                    |
| IL1B       | 3.182             | 10         | 8            | CCL2,CCL7,CXCL1,CXCL2,CXCL5,CXCL6,CXCL8,LBP                                 | chemotaxis of neutrophils    | 100% (1/1)                                    |
| HIF1A      | 3.162             | 12         | 10           | CD44,CXCL2,CXCL8,FYN,IL1B,IL6,NOS2,PTGS2,SERPINE1,VEGFA                     | cell movement of phagocytes  | 100% (1/1)                                    |
| MYD88      | 3.162             | 12         | 10           | CD44,CXCL1,CXCL2,CXCL6,CXCL8,ICAM1,IL1B,IL6,NOS2,SAA1                       | migration of neutrophils     | 100% (1/1)                                    |
| TICAM1     | 3.162             | 12         | 10           | CCL2,CD38,CXCL2,CXCL6,CXCL8,IL1B,IL6,PTGS2,SERPINE1,SOCS1                   | chemotaxis                   | 0% (0/1)                                      |
| PTGS2      | 3.024             | 9          | 7            | CCL2,CXCL8,ICAM1,IL1B,IL6,NOS2,VEGFA                                        | activation of blood cells    | 100% (1/1)                                    |

| Regulators     | Consistency Score | Node Total | Target Total | Target Molecules                                                    | Diseases & Functions              | Known Regulator-Disease/Function Relationship |
|----------------|-------------------|------------|--------------|---------------------------------------------------------------------|-----------------------------------|-----------------------------------------------|
| PTGS2          | 3.024             | 9          | 7            | CCL2,CXCL8,ICAM1,IL1B,IL6,NOS2,VEGFA                                | activation of leukocytes          | 100% (1/1)                                    |
| PTGS2          | 3.024             | 9          | 7            | CCL2,CXCL8,IL1B,IL6,MMP1,NOS2,VEGFA                                 | invasion of cells                 | 100% (1/1)                                    |
| AGER           | 3                 | 11         | 9            | CCL2,F3,ICAM1,IL1B,IL6,PTGS2,S100A9,SERPINE1,VEGFA                  | cell movement                     | 100% (1/1)                                    |
| AGER           | 3                 | 11         | 9            | CCL2,F3,ICAM1,IL1B,IL6,PTGS2,S100A9,SERPINE1,VEGFA                  | leukocyte migration               | 100% (1/1)                                    |
| PTGS2          | 3                 | 11         | 9            | CCL2,CXCL5,CXCL8,ICAM1,IL1B,IL6,NOS2,TGM2,VEGFA                     | cell movement of myeloid cells    | 100% (1/1)                                    |
| PTGS2          | 3                 | 11         | 9            | CCL2,CXCL5,CXCL8,IL1B,IL6,MMP1,NOS2,TGM2,VEGFA                      | cell movement of tumor cell lines | 100% (1/1)                                    |
| PTGS2          | 3                 | 11         | 9            | CCL2,CXCL5,CXCL8,IL1B,IL6,MMP1,NOS2,TGM2,VEGFA                      | migration of tumor cell lines     | 100% (1/1)                                    |
| TLR4           | 3                 | 11         | 9            | CCL2,CD44,CXCL2,CXCL6,CXCL8,ICAM1,IL1B,IL6,NOS2                     | migration of granulocytes         | 0% (0/1)                                      |
| TNFRSF1A       | 3                 | 11         | 9            | CCL2,CD44,CXCL1,CXCL2,CXCL8,ICAM1,IL1B,IL6,SAA1                     | migration of granulocytes         | 100% (1/1)                                    |
| IL18           | 2.887             | 14         | 12           | CCL2,CCL20,CD44,CXCL8,ICAM1,IL1B,IL6,NFKBIZ,NOS2,PTGS2,TGFBR2,VEGFA | cell movement of leukocytes       | 100% (1/1)                                    |
| IL1B           | 2.858             | 8          | 6            | CCL2,FGF2,LIF,NGF,PLD1,VEGFA                                        | activation of protein             | 100% (1/1)                                    |
| PGF            | 2.858             | 8          | 6            | CCL2,CCL20,CXCL8,IL1B,IL6,SERPINE1                                  | chemotaxis                        | 100% (1/1)                                    |
| PTGS2          | 2.858             | 8          | 6            | CCL2,CXCL8,IL1B,IL6,NOS2,VEGFA                                      | activation of phagocytes          | 100% (1/1)                                    |
| PTGS2          | 2.858             | 8          | 6            | CCL2,CXCL8,IL6,MMP1,NOS2,VEGFA                                      | invasion of tumor cell lines      | 100% (1/1)                                    |
| ERK1/2         | 2.846             | 12         | 10           | CCL2,CD44,CXCL8,F3,FGF2,ICAM1,IL1B,IL6,SERPINE1,VEGFA               | recruitment of cells              | 0% (0/1)                                      |
| Jnk            | 2.846             | 12         | 10           | CCL2,CXCL6,CXCL8,ICAM1,IL1B,IL6,NOS2,PTGS2,SERPINE1,TGM2            | leukocyte migration               | 100% (1/1)                                    |
| NFkB (complex) | 2.846             | 12         | 10           | CCL2,CD44,CXCL1,CXCL2,CXCL6,CXCL8,ICAM1,IL1B,IL6,NOS2               | migration of granulocytes         | 0% (0/1)                                      |
| P38 MAPK       | 2.846             | 12         | 10           | CCL2,CD82,CEBPB,CXCL8,IL1B,IL6,NGF,NOS2,PTGS2,VEGFA                 | synthesis of lipid                | 100% (1/1)                                    |
| TLR4           | 2.846             | 12         | 10           | CCL2,CCL20,CD44,CXCL2,CXCL8,ICAM1,IL1B,IL6,NFKBIA,NOD2              | recruitment of blood cells        | 100% (1/1)                                    |

| Regulators | Consistency Score | Node Total | Target Total | Target Molecules                                          | Diseases & Functions                      | Known Regulator-Disease/Function Relationship |
|------------|-------------------|------------|--------------|-----------------------------------------------------------|-------------------------------------------|-----------------------------------------------|
| TLR4       | 2.846             | 12         | 10           | CCL2,CCL20,CD44,CXCL2,CXCL8,ICAM1,IL1B,IL6,NFKBIA,NOD2    | recruitment of cells                      | 100% (1/1)                                    |
| TLR4       | 2.846             | 12         | 10           | CCL2,CCL20,CD44,CXCL2,CXCL8,ICAM1,IL1B,IL6,NFKBIA,NOD2    | recruitment of leukocytes                 | 100% (1/1)                                    |
| TNFRSF1A   | 2.846             | 12         | 10           | CCL2,CD44,CXCL1,CXCL2,CXCL8,ICAM1,IL1B,IL6,LBP,SAA1       | cell movement of granulocytes             | 100% (1/1)                                    |
| TNFRSF1A   | 2.846             | 12         | 10           | CCL2,CD44,CXCL1,CXCL2,CXCL8,ICAM1,IL1B,IL6,LBP,SAA1       | cell movement of neutrophils              | 100% (1/1)                                    |
| TNFRSF1A   | 2.846             | 12         | 10           | CCL2,CCL20,CD44,CXCL1,CXCL2,CXCL8,ICAM1,IL1B,IL6,SERPINE1 | recruitment of leukocytes                 | 100% (1/1)                                    |
| CCL5       | 2.828             | 10         | 8            | C5AR1,CCL2,CD44,CXCL2,CXCL8,IL1B,IL6,PLAUR                | cell movement of leukocytes               | 100% (1/1)                                    |
| CCL5       | 2.828             | 10         | 8            | C5AR1,CCL2,CD44,CXCL2,CXCL8,IL1B,IL6,PLAUR                | chemotaxis                                | 100% (1/1)                                    |
| ECSIT      | 2.828             | 10         | 8            | CD44,CXCL8,IER3,IL1B,IL6,NFKBIA,PLAUR,PTGS2               | invasion of cells                         | 0% (0/1)                                      |
| IL17A      | 2.828             | 10         | 8            | CCL2,CXCL1,CXCL2,CXCL5,CXCL6,CXCL8,IL1B,S100A9            | chemotaxis of neutrophils                 | 0% (0/1)                                      |
| IL1R1      | 2.828             | 10         | 8            | CXCL8,ICAM1,IL1B,IL6,LBP,NOS2,PTGS2,SAA1                  | activation of leukocytes                  | 0% (0/1)                                      |
| MIF        | 2.828             | 10         | 8            | CD44,CXCL2,CXCL8,HIF1A,ICAM1,IL1B,IL6,NOS2                | cell movement of leukocytes               | 100% (1/1)                                    |
| MIF        | 2.828             | 10         | 8            | ACTA2,CD44,CXCL8,HIF1A,IL1B,IL6,MMP1,NOS2                 | invasion of cells                         | 100% (1/1)                                    |
| PRKCD      | 2.828             | 10         | 8            | CCL20,CXCL8,IL1B,IL6,LIF,SERPINE1,SOCS1,VEGFA             | chemotaxis                                | 100% (1/1)                                    |
| PTGS2      | 2.828             | 10         | 8            | CCL2,CXCL5,CXCL8,IL1B,IL6,NOS2,TGM2,VEGFA                 | cell movement of breast cancer cell lines | 0% (0/1)                                      |
| PTGS2      | 2.828             | 10         | 8            | CCL2,CXCL5,CXCL8,IL1B,IL6,NOS2,TGM2,VEGFA                 | migration of breast cancer cell lines     | 0% (0/1)                                      |
| TLR4       | 2.828             | 10         | 8            | CCL2,CD44,CXCL2,CXCL8,ICAM1,IL1B,NFKBIA,NOD2              | recruitment of phagocytes                 | 100% (1/1)                                    |
| TNFRSF1A   | 2.828             | 10         | 8            | CCL2,CD44,CXCL1,CXCL2,CXCL8,ICAM1,IL1B,SERPINE1           | recruitment of phagocytes                 | 100% (1/1)                                    |
| TNFSF12    | 2.828             | 10         | 8            | CCL2,CXCL2,CXCL6,CXCL8,ICAM1,IL1B,IL6,S100A9              | migration of granulocytes                 | 0% (0/1)                                      |

| Regulators                            | Consistency Score | Node Total | Target Total | Target Molecules                                                                        | Diseases & Functions              | Known Regulator-Disease/Function Relationship |
|---------------------------------------|-------------------|------------|--------------|-----------------------------------------------------------------------------------------|-----------------------------------|-----------------------------------------------|
| miR-155-5p<br>(miRNAs w/seed UAAUGCU) | 2.828             | 10         | 8            | CCL20,CXCL1,CXCL2,CXCL8,IL1B,IL6,SERPINE1,SOCS1                                         | chemotaxis                        | 0% (0/1)                                      |
| JUN                                   | 2.75              | 18         | 16           | CCL2,CCL8,CD44,CXCL5,CXCL8,IL1B,IL6,LIF,MMP1,NFKBIA,NGF,NOS2,PLAUR,PTGS2,SERPINE1,VEGFA | cell movement of tumor cell lines | 100% (1/1)                                    |
| COL18A1                               | 2.714             | 13         | 11           | CCL2,F3,FGF2,HIF1A,IL6,MMP1,NOS2,PTGS2,SERPINE1,THBS1,VEGFA                             | neoplasia of cells                | 100% (1/1)                                    |
| EGFR                                  | 2.714             | 13         | 11           | CXCL8,F3,ICAM1,IL1B,IL6,NOS2,PLAUR,PTGS2,SERPINE1,TGM2,VEGFA                            | leukocyte migration               | 100% (1/1)                                    |
| PTGS2                                 | 2.683             | 7          | 5            | CCL2,CXCL8,IL1B,IL6,NOS2                                                                | activation of myeloid cells       | 100% (1/1)                                    |
| ZC3H12A                               | 2.683             | 7          | 5            | CCL2,IL1B,IL6,NOS2,TNFRSF1B                                                             | leukocyte migration               | 100% (1/1)                                    |
| RELA                                  | 2.673             | 16         | 14           | CCL2,CCL20,CD44,CXCL1,CXCL2,CXCL8,HIF1A,ICAM1,IL1B,IL6,NOS2,PTGS2,TGM2,VEGFA            | adhesion of immune cells          | 100% (1/1)                                    |
| CD40LG                                | 2.667             | 11         | 9            | CCL2,CXCL8,IL1B,IL6,NAMPT,NFKBIA,NOS2,PTGS2,VEGFA                                       | invasion of cells                 | 100% (1/1)                                    |
| CSF2                                  | 2.667             | 11         | 9            | CCL2,CD38,CXCL8,ICAM1,IL1B,IL6,NOS2,TGM2,TNFRSF1B                                       | cell movement of leukocytes       | 100% (1/1)                                    |
| IL6                                   | 2.667             | 11         | 9            | CCL2,CCL20,CXCL2,CXCL6,ICAM1,NOS2,PTGS2,SAA1,VEGFA                                      | migration of phagocytes           | 100% (1/1)                                    |
| CAMP                                  | 2.646             | 9          | 7            | CCL2,CCL20,CCL7,CXCL1,CXCL8,IL1B,IL6                                                    | chemotaxis                        | 100% (1/1)                                    |
| CCL5                                  | 2.646             | 9          | 7            | CCL2,CD44,CXCL2,CXCL8,IL1B,IL6,PLAUR                                                    | adhesion of blood cells           | 100% (1/1)                                    |
| EGR1                                  | 2.646             | 9          | 7            | CCL2,CD44,CXCL2,CXCL8,ICAM1,IL1B,VEGFA                                                  | accumulation of blood cells       | 100% (1/1)                                    |
| EGR1                                  | 2.646             | 9          | 7            | CCL2,CD44,CXCL2,CXCL8,ICAM1,IL1B,VEGFA                                                  | accumulation of leukocytes        | 100% (1/1)                                    |
| EGR1                                  | 2.646             | 9          | 7            | CCL2,CD44,CXCL2,CXCL6,CXCL8,ICAM1,IL1B                                                  | cell movement of neutrophils      | 0% (0/1)                                      |
| EGR1                                  | 2.646             | 9          | 7            | CCL2,CD44,CXCL2,CXCL6,CXCL8,ICAM1,IL1B                                                  | migration of granulocytes         | 0% (0/1)                                      |
| ERK                                   | 2.646             | 9          | 7            | CCL2,FGF2,ICAM1,IL1B,IL6,LIF,PTGS2                                                      | formation of osteoclasts          | 0% (0/1)                                      |
| IL1B                                  | 2.646             | 9          | 7            | CCL2,FGF2,ICAM1,IL11,IL6,LIF,PTGS2                                                      | formation of osteoclasts          | 100% (1/1)                                    |

| Regulators                        | Consistency Score | Node Total | Target Total | Target Molecules                                                   | Diseases & Functions                  | Known Regulator-Disease/Function Relationship |
|-----------------------------------|-------------------|------------|--------------|--------------------------------------------------------------------|---------------------------------------|-----------------------------------------------|
| Immunoglobulin                    | 2.646             | 9          | 7            | CCL2,CCL7,CCL8,CXCL2,IL1B,NFKBIA,NOS2                              | cell movement of myeloid cells        | 100% (1/1)                                    |
| Immunoglobulin                    | 2.646             | 9          | 7            | CCL2,CCL7,CCL8,CXCL2,IL1B,NFKBIA,NOS2                              | cell movement of phagocytes           | 100% (1/1)                                    |
| LCN2                              | 2.646             | 9          | 7            | CCL20,CXCL2,CXCL6,IL1B,IL1RN,IL6,NOS2                              | inflammatory response                 | 100% (1/1)                                    |
| MAP2K3                            | 2.646             | 9          | 7            | CCL8,ICAM1,IL1B,IL6,NOS2,SERPINE1,VEGFA                            | leukocyte migration                   | 100% (1/1)                                    |
| NLRP12                            | 2.646             | 9          | 7            | CXCL2,CXCL6,CXCL8,ICAM1,IL1B,IL6,NOS2                              | migration of neutrophils              | 100% (1/1)                                    |
| NOD2                              | 2.646             | 9          | 7            | CCL2,CXCL8,ICAM1,IL1B,IL6,NFKBIA,NOS2                              | activation of leukocytes              | 100% (1/1)                                    |
| NOD2                              | 2.646             | 9          | 7            | CCL2,CXCL2,CXCL8,ICAM1,IL1B,IL6,NOS2                               | migration of granulocytes             | 0% (0/1)                                      |
| PI3K (complex)                    | 2.646             | 9          | 7            | CEBPB,CXCL8,HIF1A,IL6,NOS2,PTGS2,VEGFA                             | invasion of tumor cell lines          | 100% (1/1)                                    |
| STAT1                             | 2.646             | 9          | 7            | CCL2,CCL20,CXCL2,HIF1A,ICAM1,IL6,NOS2                              | migration of phagocytes               | 0% (0/1)                                      |
| STK11                             | 2.646             | 9          | 7            | CCL2,HIF1A,IL6,NOS2,PTGS2,SERPINE1,VEGFA                           | leukocyte migration                   | 0% (0/1)                                      |
| TAB1                              | 2.646             | 9          | 7            | CCL20,CFB,CXCL8,IL1B,IL6,PTGS2,SAA1                                | cell movement of leukocytes           | 0% (0/1)                                      |
| TLR2                              | 2.646             | 9          | 7            | CCL2,CXCL2,CXCL8,IL1B,IL6,PTGS2,SOCS1                              | chemotaxis                            | 100% (1/1)                                    |
| TLR2                              | 2.646             | 9          | 7            | CCL2,CXCL2,CXCL8,ICAM1,IL1B,IL6,NOS2                               | migration of granulocytes             | 0% (0/1)                                      |
| TLR9                              | 2.646             | 9          | 7            | CD38,CXCL8,IL1B,IL6,PTGS2,SERPINE1,SOCS1                           | chemotaxis                            | 100% (1/1)                                    |
| miR-155-5p (miRNAs w/seed UAAUGC) | 2.646             | 9          | 7            | CCL20,CXCL1,CXCL2,CXCL8,IL1B,IL6,SERPINE1                          | inflammatory response                 | 0% (0/1)                                      |
| HIF1A                             | 2.598             | 14         | 12           | CXCL2,CXCL8,FYN,GPER1,HSPB1,IL1B,IL6,NOS2,PIM2,PTGS2,SLC40A1,VEGFA | cellular homeostasis                  | 100% (1/1)                                    |
| IL1A                              | 2.53              | 12         | 10           | CCL2,CD44,CXCL5,CXCL8,FGF2,IL1B,IL32,IL6,NOS2,SERPINE1             | migration of breast cancer cell lines | 0% (0/1)                                      |

| Regulators    | Consistency Score | Node Total | Target Total | Target Molecules                                | Diseases & Functions                          | Known Regulator-Disease/Function Relationship |
|---------------|-------------------|------------|--------------|-------------------------------------------------|-----------------------------------------------|-----------------------------------------------|
| BCL3          | 2.5               | 6          | 4            | CXCL8,ICAM1,IL1B,IRF1                           | activation of leukocytes                      | 100% (1/1)                                    |
| C5AR1         | 2.5               | 6          | 4            | CXCL2,FCER1G,IL1B,IL6                           | inflammatory response                         | 100% (1/1)                                    |
| PRDM1         | 2.5               | 6          | 4            | CXCL2,CXCL6,IL1B,IL6                            | cell movement of leukocytes                   | 100% (1/1)                                    |
| PRDM1         | 2.5               | 6          | 4            | CXCL2,CXCL6,IL1B,IL6                            | inflammatory response                         | 100% (1/1)                                    |
| PTGS2         | 2.5               | 6          | 4            | ICAM1,IL1B,NOS2,VEGFA                           | vascularization                               | 100% (1/1)                                    |
| PTGS2         | 2.5               | 6          | 4            | ICAM1,IL1B,NOS2,VEGFA                           | vascularization of absolute anatomical region | 100% (1/1)                                    |
| ERK1/2        | 2.475             | 10         | 8            | CD44,F3,FGF2,ICAM1,IL1B,IL6,SERPINE1,VEGFA      | binding of tumor cell lines                   | 100% (1/1)                                    |
| JUN           | 2.475             | 10         | 8            | IL1B,IL24,IL6,LIF,NFKBIA,NGF,PLAUR,PTGS2        | differentiation of tumor cell lines           | 100% (1/1)                                    |
| Mek           | 2.475             | 10         | 8            | CXCL8,HIF1A,IL1B,IL6,NGF,PTGS2,SERPINE1,TNFAIP3 | leukocyte migration                           | 100% (1/1)                                    |
| PDGF BB       | 2.475             | 10         | 8            | CCL2,CCL8,CD44,CXCL8,IL1B,IL6,PTGS2,VEGFA       | migration of phagocytes                       | 0% (0/1)                                      |
| RET           | 2.475             | 10         | 8            | CCL2,CCL20,CXCL8,IL1B,IL6,MMP1,PLAUR,S100A9     | migration of tumor cell lines                 | 0% (0/1)                                      |
| TLR3          | 2.475             | 10         | 8            | CCL20,CD38,CXCL2,CXCL8,IL1B,IL6,PTGS2,SERPINE1  | chemotaxis                                    | 0% (0/1)                                      |
| Alpha catenin | 2.449             | 8          | 6            | CXCL2,IL1B,IL6,PTGS2,S100A9,TGM2                | adhesion of immune cells                      | 0% (0/1)                                      |
| Alpha catenin | 2.449             | 8          | 6            | CXCL2,CXCL6,IL1B,IL6,S100A9,SA1                 | migration of neutrophils                      | 0% (0/1)                                      |
| CCL5          | 2.449             | 8          | 6            | C5AR1,CCL2,CD44,CXCL2,CXCL8,IL1B                | accumulation of myeloid cells                 | 100% (1/1)                                    |
| CCL5          | 2.449             | 8          | 6            | C5AR1,CCL2,CD44,CXCL2,CXCL8,IL1B                | accumulation of phagocytes                    | 100% (1/1)                                    |
| CCL5          | 2.449             | 8          | 6            | CCL2,CD44,CXCL2,CXCL8,IL1B,PLAUR                | adhesion of endothelial cells                 | 0% (0/1)                                      |
| CD14          | 2.449             | 8          | 6            | CCL2,CXCL2,ICAM1,IL1B,IL6,PTGS2                 | adhesion of immune cells                      | 100% (1/1)                                    |

| Regulators | Consistency Score | Node Total | Target Total | Target Molecules                  | Diseases & Functions          | Known Regulator-Disease/Function Relationship |
|------------|-------------------|------------|--------------|-----------------------------------|-------------------------------|-----------------------------------------------|
| CD14       | 2.449             | 8          | 6            | CCL2,CXCL2,IL1B,IL6,PTGS2,SOCS1   | chemotaxis                    | 0% (0/1)                                      |
| CITED2     | 2.449             | 8          | 6            | CXCL1,CXCL8,HIF1A,IL6,MMP1,VEGFA  | cell movement                 | 100% (1/1)                                    |
| DUSP1      | 2.449             | 8          | 6            | CXCL2,CXCL8,IL1B,IL6,NOS2,S100A9  | migration of neutrophils      | 0% (0/1)                                      |
| EGF        | 2.449             | 8          | 6            | CD44,CEBPB,CXCL8,NGF,PTGS2,VEGFA  | activation of phagocytes      | 0% (0/1)                                      |
| EGR1       | 2.449             | 8          | 6            | CCL2,CD44,CXCL2,CXCL8,IL1B,VEGFA  | accumulation of myeloid cells | 100% (1/1)                                    |
| EGR1       | 2.449             | 8          | 6            | CCL2,CD44,CXCL2,CXCL8,IL1B,VEGFA  | accumulation of phagocytes    | 100% (1/1)                                    |
| ERK1/2     | 2.449             | 8          | 6            | CCL2,CD44,CXCL8,FGF2,IL1B,VEGFA   | accumulation of phagocytes    | 0% (0/1)                                      |
| ERK1/2     | 2.449             | 8          | 6            | CCL2,CD44,CXCL8,ICAM1,IL1B,VEGFA  | adhesion of endothelial cells | 0% (0/1)                                      |
| F7         | 2.449             | 8          | 6            | CXCL2,CXCL8,IL1B,LIF,PLAUR,VEGFA  | adhesion of immune cells      | 0% (0/1)                                      |
| F7         | 2.449             | 8          | 6            | CXCL2,CXCL8,IL1B,LIF,PLAUR,VEGFA  | chemotaxis                    | 100% (1/1)                                    |
| F7         | 2.449             | 8          | 6            | CXCL2,CXCL8,F3,IL1B,PLAUR,VEGFA   | leukocyte migration           | 100% (1/1)                                    |
| FBXO32     | 2.449             | 8          | 6            | CCL20,CXCL2,CXCL6,IL1B,IL6,PTGS2  | cell movement of leukocytes   | 0% (0/1)                                      |
| FBXO32     | 2.449             | 8          | 6            | CCL20,CXCL2,CXCL6,IL1B,IL6,PTGS2  | chemotaxis                    | 0% (0/1)                                      |
| FBXO32     | 2.449             | 8          | 6            | CCL20,CXCL2,CXCL6,IL1B,IL6,PTGS2  | inflammatory response         | 0% (0/1)                                      |
| IL15       | 2.449             | 8          | 6            | CCL2,CD44,CXCL2,IL6,NOS2,TGFBR2   | cell movement of leukocytes   | 100% (1/1)                                    |
| IL1B       | 2.449             | 8          | 6            | CCL2,FGF2,HIF1A,NGF,PTGS2,VEGFA   | flow of blood                 | 100% (1/1)                                    |
| IL1B       | 2.449             | 8          | 6            | FGF2,ICAM1,NGF,PTGS2,PTX3,VEGFA   | permeability of vasculature   | 0% (0/1)                                      |
| IL1        | 2.449             | 8          | 6            | CCL2,CXCL8,IL6,MMP1,MMP13,PTGS2   | activation of cells           | 100% (1/1)                                    |
| KLK5       | 2.449             | 8          | 6            | CCL20,CXCL2,ICAM1,IL1B,IL6,S100A9 | adhesion of immune cells      | 0% (0/1)                                      |
| KLK5       | 2.449             | 8          | 6            | CCL20,CXCL2,ICAM1,IL1B,IL6,S100A9 | cell movement of leukocytes   | 100% (1/1)                                    |

| Regulators | Consistency Score | Node Total | Target Total | Target Molecules                                                 | Diseases & Functions                      | Known Regulator-Disease/Function Relationship |
|------------|-------------------|------------|--------------|------------------------------------------------------------------|-------------------------------------------|-----------------------------------------------|
| P38 MAPK   | 2.449             | 8          | 6            | CEBPB,CXCL8,IL1B,NGF,NOS2,PTGS2                                  | concentration of fatty acid               | 100% (1/1)                                    |
| PTGS2      | 2.449             | 8          | 6            | CCL2,CXCL8,ICAM1,IL1B,NOS2,VEGFA                                 | cell movement of antigen presenting cells | 100% (1/1)                                    |
| TBK1       | 2.449             | 8          | 6            | CXCL8,ICAM1,IL6,NFKBIZ,PTGS2,VEGFA                               | activation of leukocytes                  | 0% (0/1)                                      |
| TBK1       | 2.449             | 8          | 6            | CXCL2,CXCL8,ICAM1,IL6,PTGS2,VEGFA                                | adhesion of immune cells                  | 0% (0/1)                                      |
| TBK1       | 2.449             | 8          | 6            | CXCL2,CXCL8,ICAM1,IL6,PTGS2,VEGFA                                | migration of phagocytes                   | 0% (0/1)                                      |
| TRAF6      | 2.449             | 8          | 6            | CCL2,CXCL2,CXCL8,ICAM1,IL1B,IL6                                  | adhesion of immune cells                  | 0% (0/1)                                      |
| TRAF6      | 2.449             | 8          | 6            | CCL2,CXCL2,CXCL8,ICAM1,IL1B,IL6                                  | migration of granulocytes                 | 0% (0/1)                                      |
| mir-146    | 2.449             | 8          | 6            | CCL2,CCL7,CXCL8,IL1B,IL6,SOCS1                                   | chemotaxis                                | 0% (0/1)                                      |
| IL17A      | 2.333             | 11         | 9            | CEBPB,CXCL1,CXCL5,ICAM1,IL1B,IL1RN,IL6,NOS2,PTGS2                | development of lymphatic system           | 100% (1/1)                                    |
| APP        | 2.309             | 14         | 12           | CCL20,CTGF,CXCL2,FGF2,IL1B,IL6,MME,NOS2,NRP1,PLAT,PTGS2,SERPINE1 | migration of tumor cell lines             | 100% (1/1)                                    |
| BCL3       | 2.309             | 5          | 3            | ICAM1,IL1B,IRF1                                                  | proliferation of lymphocytes              | 100% (1/1)                                    |
| BCL3       | 2.309             | 5          | 3            | ICAM1,IL1B,IRF1                                                  | proliferation of mononuclear leukocytes   | 100% (1/1)                                    |
| C5AR1      | 2.309             | 5          | 3            | FCER1G,IL1B,IL6                                                  | differentiation of lymphatic system cells | 100% (1/1)                                    |
| C5AR1      | 2.309             | 5          | 3            | FCER1G,IL1B,IL6                                                  | fatty acid metabolism                     | 100% (1/1)                                    |
| C5AR1      | 2.309             | 5          | 3            | FCER1G,IL1B,IL6                                                  | metabolism of eicosanoid                  | 100% (1/1)                                    |
| C5AR1      | 2.309             | 5          | 3            | FCER1G,IL1B,IL6                                                  | synthesis of eicosanoid                   | 100% (1/1)                                    |



| Regulators | Consistency Score | Node Total | Target Total | Target Molecules                            | Diseases & Functions           | Known Regulator-Disease/Function Relationship |
|------------|-------------------|------------|--------------|---------------------------------------------|--------------------------------|-----------------------------------------------|
| C5AR1      | 2.309             | 5          | 3            | FCER1G,IL1B,IL6                             | synthesis of fatty acid        | 100% (1/1)                                    |
| IL1RN      | 2.309             | 5          | 3            | CD44,IL1B,IRF1                              | accumulation of myeloid cells  | 100% (1/1)                                    |
| IL1RN      | 2.309             | 5          | 3            | CD44,IL1B,IRF1                              | accumulation of phagocytes     | 100% (1/1)                                    |
| NAMPT      | 2.309             | 5          | 3            | CXCL8,IL6,MMP1                              | invasion of tumor cell lines   | 100% (1/1)                                    |
| NOD2       | 2.309             | 5          | 3            | ICAM1,IL1B,IL6                              | cell-mediated response         | 100% (1/1)                                    |
| PGF        | 2.309             | 5          | 3            | CCL2,CCL20,CXCL8                            | chemotaxis of tumor cell lines | 100% (1/1)                                    |
| PGF        | 2.309             | 5          | 3            | CCL2,CCL20,CXCL8                            | homing of tumor cell lines     | 100% (1/1)                                    |
| C5         | 2.268             | 9          | 7            | CXCL2,CXCL8,F3,IL1B,IL6,MMP1,SERPINE1       | cell movement                  | 100% (1/1)                                    |
| CHUK       | 2.268             | 9          | 7            | CXCL2,CXCL6,CXCL8,IL6,NGF,PTGS2,VEGFA       | chemotaxis                     | 100% (1/1)                                    |
| EGFR       | 2.268             | 9          | 7            | CEBPB,CXCL8,ICAM1,IL1B,IL6,TGM2,VEGFA       | cell viability of blood cells  | 0% (0/1)                                      |
| EZH2       | 2.268             | 9          | 7            | CXCL1,CXCL2,CXCL8,IL6,PTGS2,SAA1,VEGFA      | migration of phagocytes        | 0% (0/1)                                      |
| FOS        | 2.268             | 9          | 7            | CCL2,CD44,CXCL8,F3,ICAM1,SERPINE1,VEGFA     | recruitment of blood cells     | 100% (1/1)                                    |
| IL17A      | 2.268             | 9          | 7            | CXCL1,CXCL5,ICAM1,IL1B,IL6,NOS2,PTGS2       | Lymphocyte homeostasis         | 100% (1/1)                                    |
| IL17A      | 2.268             | 9          | 7            | CXCL1,CXCL5,ICAM1,IL1B,IL6,NOS2,PTGS2       | T cell homeostasis             | 100% (1/1)                                    |
| INSIG1     | 2.268             | 9          | 7            | ACSL4,CXCL2,CXCL6,IL6,NFKBIZ,PLD1,S100A9    | cell movement                  | 0% (0/1)                                      |
| PLG        | 2.268             | 9          | 7            | CCL2,F3,FYN,IL1B,IL6,PTGS2,SERPINE1         | migration of tumor cell lines  | 100% (1/1)                                    |
| PRKCA      | 2.268             | 9          | 7            | CCL2,CXCL2,NOS2,PTGS2,S100A9,SERPINE1,VEGFA | migration of phagocytes        | 0% (0/1)                                      |
| TGFA       | 2.268             | 9          | 7            | CCL20,CXCL2,CXCL8,IL6,PTGS2,SERPINE1,VEGFA  | migration of phagocytes        | 0% (0/1)                                      |
| TNF        | 2.268             | 9          | 7            | CCL2,IL1B,LIF,NGF,SOCS1,TYMP,VEGFA          | activation of protein          | 0% (0/1)                                      |

| Regulators | Consistency Score | Node Total | Target Total | Target Molecules            | Diseases & Functions           | Known Regulator-Disease/Function Relationship |
|------------|-------------------|------------|--------------|-----------------------------|--------------------------------|-----------------------------------------------|
| BIRC3      | 2.236             | 7          | 5            | CCL2,CXCL1,CXCL8,IL1B,IL6   | adhesion of immune cells       | 0% (0/1)                                      |
| BIRC3      | 2.236             | 7          | 5            | CCL2,CXCL1,CXCL8,IL1B,IL6   | cellular homeostasis           | 0% (0/1)                                      |
| BIRC3      | 2.236             | 7          | 5            | CCL2,CXCL1,CXCL8,IL1B,IL6   | chemotaxis                     | 0% (0/1)                                      |
| BIRC3      | 2.236             | 7          | 5            | CCL2,CXCL1,CXCL8,IL1B,IL6   | inflammatory response          | 100% (1/1)                                    |
| BIRC3      | 2.236             | 7          | 5            | CCL2,CXCL1,CXCL8,IL1B,IL6   | migration of granulocytes      | 0% (0/1)                                      |
| C3         | 2.236             | 7          | 5            | CXCL2,IL1B,IL6,NOS2,VEGFA   | leukocyte migration            | 100% (1/1)                                    |
| CHUK       | 2.236             | 7          | 5            | CXCL2,CXCL6,CXCL8,IL6,NGF   | chemotaxis of leukocytes       | 100% (1/1)                                    |
| Cg         | 2.236             | 7          | 5            | ICAM1,PLAT,PTGS2,PTX3,VEGFA | permeability of vasculature    | 100% (1/1)                                    |
| FCGR2A     | 2.236             | 7          | 5            | CCL2,CXCL2,IL1B,IL6,VEGFA   | adhesion of immune cells       | 100% (1/1)                                    |
| FCGR2A     | 2.236             | 7          | 5            | CCL2,CXCL2,IL1B,IL6,VEGFA   | chemotaxis                     | 100% (1/1)                                    |
| FCGR2A     | 2.236             | 7          | 5            | CCL2,CXCL2,IL1B,IL6,VEGFA   | leukocyte migration            | 100% (1/1)                                    |
| Fcer1      | 2.236             | 7          | 5            | CCL2,CXCL8,FYN,IL1B,IL6     | adhesion of immune cells       | 100% (1/1)                                    |
| Fcer1      | 2.236             | 7          | 5            | CCL2,CXCL8,FYN,IL1B,IL6     | cellular homeostasis           | 100% (1/1)                                    |
| Fcer1      | 2.236             | 7          | 5            | CCL2,CXCL8,FYN,IL1B,IL6     | invasion of cells              | 0% (0/1)                                      |
| Fcer1      | 2.236             | 7          | 5            | CCL2,CXCL8,FYN,IL1B,IL6     | migration of tumor cell lines  | 0% (0/1)                                      |
| IKBKB      | 2.236             | 7          | 5            | CCL2,CXCL2,CXCL6,CXCL8,IL1B | chemotaxis of neutrophils      | 100% (1/1)                                    |
| IKBKB      | 2.236             | 7          | 5            | CCL2,IL1B,NGF,PTGS2,VEGFA   | flow of blood                  | 0% (0/1)                                      |
| IKBKB      | 2.236             | 7          | 5            | ICAM1,NGF,PTGS2,PTX3,VEGFA  | permeability of vasculature    | 0% (0/1)                                      |
| IL22       | 2.236             | 7          | 5            | CXCL2,IL1B,LBP,NOS2,SAA1    | cell movement of myeloid cells | 100% (1/1)                                    |

| Regulators  | Consistency Score | Node Total | Target Total | Target Molecules             | Diseases & Functions         | Known Regulator-Disease/Function Relationship |
|-------------|-------------------|------------|--------------|------------------------------|------------------------------|-----------------------------------------------|
| IL22        | 2.236             | 7          | 5            | CXCL2,IL1B,LBP,NOS2,SAA1     | cell movement of phagocytes  | 0% (0/1)                                      |
| IRAK2       | 2.236             | 7          | 5            | CXCL2,CXCL8,IL1B,IL6,NOS2    | inflammatory response        | 0% (0/1)                                      |
| IRAK2       | 2.236             | 7          | 5            | CXCL2,CXCL8,IL1B,IL6,NOS2    | migration of neutrophils     | 0% (0/1)                                      |
| Jnk         | 2.236             | 7          | 5            | CXCL8,ICAM1,IL1B,IL6,TGM2    | cell viability of leukocytes | 100% (1/1)                                    |
| KLF2        | 2.236             | 7          | 5            | CXCL2,F3,HIF1A,IL6,PTGS2     | leukocyte migration          | 100% (1/1)                                    |
| KLF2        | 2.236             | 7          | 5            | CXCL2,F3,HIF1A,IL6,PTGS2     | neoplasia of cells           | 0% (0/1)                                      |
| KRT17       | 2.236             | 7          | 5            | CXCL2,CXCL6,IL1B,IL6,MMP13   | cell movement                | 0% (0/1)                                      |
| Lymphotoxin | 2.236             | 7          | 5            | CCL2,ICAM1,IL1B,IL6,MMP1     | activation of cells          | 100% (1/1)                                    |
| Lymphotoxin | 2.236             | 7          | 5            | CCL2,ICAM1,IL1B,IL6,MMP1     | cell movement                | 100% (1/1)                                    |
| NR1H3       | 2.236             | 7          | 5            | IL1B,IL6,NFKBIA,NOS2,PTGS2   | invasion of cells            | 0% (0/1)                                      |
| PARP1       | 2.236             | 7          | 5            | IL1B,IL6,NOS2,PTGS2,SOCS1    | metabolism of eicosanoid     | 0% (0/1)                                      |
| PARP1       | 2.236             | 7          | 5            | IL1B,IL6,NOS2,PTGS2,SOCS1    | synthesis of eicosanoid      | 0% (0/1)                                      |
| PF4         | 2.236             | 7          | 5            | ACTA2,CCL2,CXCL8,IL1B,IL6    | invasion of cells            | 0% (0/1)                                      |
| PLA2G4A     | 2.236             | 7          | 5            | CXCL8,IL1B,IL6,NOS2,PTGS2    | activation of myeloid cells  | 0% (0/1)                                      |
| PLA2G4A     | 2.236             | 7          | 5            | CXCL8,IL1B,IL6,NOS2,PTGS2    | activation of phagocytes     | 0% (0/1)                                      |
| PLA2G4A     | 2.236             | 7          | 5            | CXCL8,IL1B,IL6,NOS2,PTGS2    | cell movement of leukocytes  | 100% (1/1)                                    |
| PLA2G4A     | 2.236             | 7          | 5            | CXCL8,IL1B,IL6,NOS2,PTGS2    | inflammatory response        | 0% (0/1)                                      |
| PLA2G4A     | 2.236             | 7          | 5            | CXCL8,IL1B,IL6,NOS2,PTGS2    | invasion of cells            | 0% (0/1)                                      |
| PPRC1       | 2.236             | 7          | 5            | CXCL8,ESM1,LAMB3,NAMPT,PTGS2 | invasion of tumor cell lines | 0% (0/1)                                      |
| PRKCE       | 2.236             | 7          | 5            | CEBPB,IL6,NOS2,PTGS2,VEGFA   | activation of phagocytes     | 100% (1/1)                                    |
| PRKCE       | 2.236             | 7          | 5            | CEBPB,IL6,NOS2,PTGS2,VEGFA   | invasion of tumor cell lines | 100% (1/1)                                    |

| Regulators | Consistency Score | Node Total | Target Total | Target Molecules           | Diseases & Functions     | Known Regulator-Disease/Function Relationship |
|------------|-------------------|------------|--------------|----------------------------|--------------------------|-----------------------------------------------|
| PRKCE      | 2.236             | 7          | 5            | CEBPB,IL6,NOS2,PTGS2,VEGFA | metabolism of eicosanoid | 0% (0/1)                                      |
