# Supplementary material
Source: PubMed Central journal article supplement (PMC5290940)
Supplement: 10.1074_M116.756601_jbc.M116.756601-3.pdf [file 10.1074_M116.756601_jbc.M116.756601-3.pdf]

**Supplementary Table 3: List of Upstream Regulators identified by Ingenuity Pathway Analysis (IPA).** IPA of the genes shown to be significantly (FDR corrected P value < 0.01) up-regulated or down-regulated >2-fold at 24 h vs basal was performed. To ensure gene annotations were current, Illumina probe IDs were used to interrogate the Ensembl BioMart database ([www.ensembl.org/biomart/martview](http://www.ensembl.org/biomart/martview)), and the Ensembl gene lists used in pathway and functional analyses (Ingenuity Systems): the identified Upstream Regulators are presented. The Molecule Type for each Regulator is provided with a prediction of its activation status (np = no prediction possible). A positive z score indicates the Regulator is activated, with higher scores indicating a more activated status; conversely, a negative score indicates the Regulator is inhibited. The p value provided is an indication of the significance of overlap between the identified Regulator and the target genes found to be regulated from the microarray dataset. Target Molecules (listed by gene name) are those within the Mechanistic Network for the identified Regulator; the total number of genes for the Network are highlighted with the number of genes identified from the microarray dataset in parentheses.

| Upstream Regulator | Molecule Type | Predicted Activation State | Activation z-score | p-value of overlap | Target Molecules                                                                                                                                                                                                                                                                                                                                                                                                                                                                                                                                         | Mechanistic Network |
|--------------------|---------------|----------------------------|--------------------|--------------------|----------------------------------------------------------------------------------------------------------------------------------------------------------------------------------------------------------------------------------------------------------------------------------------------------------------------------------------------------------------------------------------------------------------------------------------------------------------------------------------------------------------------------------------------------------|---------------------|
| TNF                | cytokine      | Activated                  | 7.561              | 3.9E-48            | ABCC3,ACSL1,ACTA2,ADORA2A,ARHGDI3,ASS1,ATF3,BAMBI,BCL3,BIRC3,BMP2,BTG3,CCL2,CCL20,CD44,CDO1,CEBPB,CFB,CH25H,CITED2,COL3A1,CRYAB,CTSK,CXCL1,CXCL2,CXCL5,CXCL6,CXCL8,CYP26B1,ELF3,F3,FTH1,G0S2,GCH1,HK2,ICAM1,IER3,IL11,IL1B,IL1RN,IL32,IL6,IL7R,IRAK3,IRF1,LAMB3,LBP,LIF,MAFF,MGST2,MMP1,MMP10,MMP13,NFKBIA,NFKBIZ,NGF,NOD2,NOS2,NOV,OLFML2B,PI3,PLA2G16,PLAUR,PLOD2,PLPP1,PPP1R3C,PRDM1,PRSS23,PTGS2,PTPN12,PTX3,RARRES3,RGS16,RGS2,S100A9,SAA1,SAT1,SDC2,SEMA3C,SEPP1,SERPINE1,SOCS1,TAGLN,TGFBR2,TGM2,TNFAIP3,TNFRSF1B,TNIP1,TYMP,VEGFA,WISP2,WLS,WTAP | 153 (16)            |
| IL1A               | cytokine      | Activated                  | 6.043              | 4.6E-43            | ADORA2A,ALDH3A2,BIRC3,CCL2,CCL20,CCL8,CD44,CTSK,CXCL1,CXCL2,CXCL5,CXCL6,CXCL8,FGF2,FTH1,GCH1,HSD11B1,ICAM1,IL11,IL1B,IL1RN,IL32,IL6,KITLG,MMP1,MMP10,MMP13,MT2A,NFKBIA,NFKBIZ,NGF,NOS2,PDZK1IP1,PI3,PTGS2,PTX3,S100A9,SAA1,SERPINA1,SERPINE1,TNFAIP3,ZC3H12A                                                                                                                                                                                                                                                                                             | 132 (15)            |
| IL1B               | cytokine      | Activated                  | 6.319              | 4.2E-33            | ABCC3,ACAN,AKR1B1,ASS1,ATF3,BIRC3,CCL2,CCL20,CCL7,CEBPB,CXCL1,CXCL2,CXCL5,CXCL6,CXCL8,DDIT4,ELF3,ENPP1,FGF2,GCH1,HIF1A,HSD11B1,ICAM1,IL11,IL1B,IL1RN,IL24,IL32,IL6,IRF1,LBP,LIF,MAP3K8,MMP1,MMP13,MT2A,NFKBIA,NFKBIZ,NGF,NOS2,NRP1,ORM1,PLD1,PLXDC2,PTGS2,PTX3,RARB,RGS16,SAA1,SERPINE1,TNFAIP3,TNFAIP6,UAP1,VEGFA,ZC3H12A                                                                                                                                                                                                                               | 142 (16)            |

| Upstream Regulator | Molecule Type           | Predicted Activation State | Activation z-score | p-value of overlap | Target Molecules                                                                                                                                                                                                                                                                                                                                                           | Mechanistic Network |
|--------------------|-------------------------|----------------------------|--------------------|--------------------|----------------------------------------------------------------------------------------------------------------------------------------------------------------------------------------------------------------------------------------------------------------------------------------------------------------------------------------------------------------------------|---------------------|
| TGFB1              | growth factor           |                            | 0.523              | 2.7E-29            | ACAN,ACTA2,AQP9,BCL3,CCL2,CD44,CITED2,COL12A1,COL3A1,COL6A3,COL7A1,CTGF,CXCL2,CXCL8,DLX5,ENPP1,F3,FGF2,FSCN1,FYN,GLDN,GPER1,HSPB1,ICAM1,IL11,IL1B,IL6,IRAK2,IRF1,LIF,MMP1,MMP10,MMP13,NET1,NFKBIA,NGF,NOS2,NRP1,PLAUR,PLOD2,PRDM1,PTGS2,PTX3,S100A4,SERPINA1,SERPINE1,SLC39A8,SLC7A5,SMTN,TAGLN,TGFBR2,TGFBR3,TGIF1,TGM2,THBS1,TUBA1A,TWIST1,TYMP,VEGFA,ZEB2               | 162 (19)            |
| RELA               | transcription regulator | Activated                  | 3.887              | 6.3E-27            | ARHGDIB,BIRC3,BMP2,CCL2,CCL20,CD44,CEBPB,CFB,CITED2,CXCL1,CXCL2,CXCL5,CXCL6,CXCL8,ELF3,FSCN1,GCH1,HIF1A,ICAM1,IL1B,IL1RN,IL6,IRF1,MMP1,NAMPT,NFKBIA,NOS2,PI3,PLD1,PRDM1,PTGS2,PTX3,SAA1,SAA2,TGM2,TNFAIP3,TREM1,TWIST1,VEGFA                                                                                                                                               | 157 (18)            |
| NFkB (complex)     | complex                 | Activated                  | 4.782              | 1.2E-25            | BAMBI,BIRC3,BMP2,CCL2,CCL20,CCL8,CD44,CEBPB,CTGF,CXCL1,CXCL2,CXCL6,CXCL8,ELF3,F3,FTH1,G0S2,GAS6,HIF1A,HSPB1,ICAM1,IER3,IL1B,IL24,IL6,IRF1,LIF,MMP1,MMP13,NAMPT,NFKBIA,NFKBIZ,NOS2,PID1,PLD1,PTGS2,SLC11A2,SLC7A5,SOCS1,TGM2,TNFAIP3,TNIP1,TWIST1,VEGFA,WTAP                                                                                                                | 180 (18)            |
| IFNG               | cytokine                | Activated                  | 3.178              | 2.9E-25            | ACTA2,ADORA2A,AQP9,ASS1,ATF3,AUTS2,BCL3,C5AR1,CCL2,CCL20,CD44,CEBPB,CH25H,CTGF,CTSK,CXCL1,CXCL2,CXCL6,CXCL8,FCER1G,FGF2,FTH1,GCH1,GLDN,GPER1,ICAM1,IFIT1,IL11,IL1B,IL1RN,IL32,IL6,IL7R,IRF1,JAK2,KCNMA1,LIF,MAP3K8,MMP1,MMP13,NFKBIA,NFKBIZ,NGF,NOS2,PLA2G16,PRDM1,PTGS2,PTX3,RARRES3,SLC29A1,SLC7A11,SLC7A5,SMTN,SOCS1,TGFBR2,TGFBR3,THBS1,THY1,TNFRSF1B,TREM1,TYMP,VEGFA | 154 (17)            |
| MYD88              | other                   | Activated                  | 4.974              | 6.9E-25            | ACSL1,AK3,ALDH1A2,BAMBI,BCL3,CCL2,CD38,CD44,CH25H,CTSK,CXCL1,CXCL2,CXCL6,CXCL8,FBXO32,ICAM1,IL1B,IL1RN,IL32,IL6,IRF1,MAFF,MMP10,NFKBIA,NFKBIZ,NOD2,NOS2,PILRA,PTGS2,SAA1,SERPINE1,SLC7A2,SLCO3A1,SOCS1,TNFAIP3,ZC3H12A                                                                                                                                                     | 161 (16)            |
| IKBKB              | kinase                  | Activated                  | 2.849              | 1E-22              | ATF3,BMP2,CCL2,CD44,CEBPB,CH25H,CTSK,CXCL2,CXCL6,CXCL8,FS CN1,FYN,GCH1,HK2,ICAM1,IL11,IL1B,IL1RN,IL6,MYO1D,NFKBIA,NGF,NOS2,PTGS2,PTX3,RGS16,S100A4,SEMA3C,SOCS1,TGFBR2,TNFRSF1B,TWIST1,UACA,VEGFA                                                                                                                                                                          | 136 (18)            |

| Upstream Regulator | Molecule Type           | Predicted Activation State | Activation z-score | p-value of overlap | Target Molecules                                                                                                                                                                                                                                                                                                                                                                                                                                              | Mechanistic Network |
|--------------------|-------------------------|----------------------------|--------------------|--------------------|---------------------------------------------------------------------------------------------------------------------------------------------------------------------------------------------------------------------------------------------------------------------------------------------------------------------------------------------------------------------------------------------------------------------------------------------------------------|---------------------|
| TP53               | transcription regulator |                            | -0.493             | 1.7E-22            | ACTA2,AKR1B1,ALDH1A2,ASS1,ATF3,BCL3,BIRC3,CITED2,CNN3, COL3A1,CRYAB,CTGF,CXCL1,CXCL8,DDIT4,DSTN,FGF2,FHL1,FYN, GAS6,GLIPR1,GPX3,GSN,HIF1A,HK2,HSPB1,HYAL1,ID3,IDH1,IER3,IL1B, IL6,KCNMA1,KIAA0101,KITLG,LIF,LIMA1,LIMK2,LPP,MAP3K8,MGST2, MMP13,MYOF,AMPT,NDRG2,NFKBIA,NOS2,NRP1,PDGFRB,PGM3, PLA2G16,PLAUR,PLOD2,PQLC3,PRDM1,PRRX2,PTGS2,PTPN12,RRAD, S100A4,SAT1,SEMA3C,SERPINE1,SLC2A12,TGFBR2,TGM2,THBS1, THY1,TNFRSF1B,TPD52L1,TWIST1,VEGFA,ZC3H12A,ZEB2 | 166 (17)            |
| TREM1              | transmembrane receptor  | Activated                  | 3.099              | 7.6E-22            | ATF3,CCL20,CCL7,CEBPB,CFB,CXCL1,CXCL2,CXCL5,CXCL8,F3,GREM 1, IL1B,IL6,IRF1,LIF,MAFF,MAP3K8,MMP1,MMP10,MT1M,NFKBIA,NOD2, PIM2,PLD1,PTGS2,RGS16,RHOU,RRAD,SPINK1,THBS1,TMEM158,YRD                                                                                                                                                                                                                                                                              | 156 (15)            |
| P38 MAPK           | group                   | Activated                  | 2.844              | 4.8E-20            | ATF3,CCL2,CCL8,CD44,CD82,CEBPB,COL3A1,CTGF,CTSK,CXCL6, CXCL8,DIO2,FBXO32,ICAM1,IER3,IL1B,IL32,IL6,MMP1,MMP13,NGF, NOS2,PTGS2,PTPN12,RRAD,SDC2,SERPINE1,THBS1,TNIP1,TREM1, VEGFA                                                                                                                                                                                                                                                                               | 139 (19)            |
| TLR7               | transmembrane receptor  | Activated                  | 3.63               | 8.4E-20            | ATF3,CCL2,CCL20,CD38,CD44,CEBPB,CXCL1,CXCL2,CXCL8,FCMR, FGF2,ICAM1,IER3,IFIT1,IL1B,IL6,IRF1,KCNMA1,NFKBIA,PLAT,PTX3, SOCS1,TNFAIP3,ZC3H12A                                                                                                                                                                                                                                                                                                                    | 137 (14)            |
| TLR4               | transmembrane receptor  | Activated                  | 4.152              | 1.9E-19            | ATF3,BAMBI,CCL2,CCL20,CCL8,CD38,CD44,CFB,CITED2,CTSK,CXCL2, CXCL6,CXCL8,FBXO32,ICAM1,IL1B,IL6,IRAK3,IRF1,MMP1,NFKBIA, NFKBIZ,NOD2,NOS2,PLAT,PTGS2,RGCC,RGS16,SLC7A11,SLCO3A1,SO CS1, ST3GAL1,TNFAIP3,TREM1,ZC3H12A                                                                                                                                                                                                                                            | 140 (17)            |
| STAT3              | transcription regulator | Activated                  | 3.385              | 3.9E-19            | ACTA2,BCL3,C5AR1,CCL2,CCL20,CD9,CEBPB,COL3A1,CXCL2,CXCL6, CXCL8,FCER1G,FSCN1,GLIPR1,HIF1A,HIST2H2AA3/HIST2H2AA4,HK2, ICAM1,IFIT1,IL1B,IL1RN,IL6,IRF1,JAK2,LBP,NAMPT,NFKBIZ,NOS2, PRDM1,PTGS2,PTPN2,SAA1,SOCS1,TAGLN,TNFRSF1B,TWIST1,VEGFA                                                                                                                                                                                                                     | 126 (17)            |
| TICAM1             | other                   | Activated                  | 4.385              | 1.4E-18            | ACSL1,AK3,BCL3,CCL2,CD38,CFB,CH25H,CXCL2,CXCL6,CXCL8,ICAM1, IFIT1,IL1B,IL6,IRF1,MAFF,NFKBIA,NFKBIZ,PILRA,PTGS2,SERPINE1, SLC7A2,SOCS1,TNFAIP3                                                                                                                                                                                                                                                                                                                 | 158 (17)            |
| FAS                | transmembrane receptor  |                            | 0.238              | 1.8E-18            | BIRC3,CCL2,CD44,COL3A1,COL6A3,CTGF,CXCL1,CXCL2,CXCL8,ICAM1 , IER3,IL1B,IL6,IRF1,MME,MMP1,MMP13,NFKBIA,NOS2,PLD1,SERPINE1,                                                                                                                                                                                                                                                                                                                                     | 155 (18)            |
| PDGF BB            | complex                 | Activated                  | 3.825              | 4.1E-18            | ACTA2,ATF3,BCL3,CCL2,CCL8,CD44,CEBPB,CTGF,CXCL8,F3,GFPT2 ,IER3,IL1B,IL6,LIF,NAMPT,PTGS2,RGS2,TAGLN,TGM2,THBS1,TNFAIP3, VEGFA                                                                                                                                                                                                                                                                                                                                  | 151 (19)            |

| Upstream Regulator | Molecule Type           | Predicted Activation State | Activation z-score | p-value of overlap | Target Molecules                                                                                                                                                                                                                                  | Mechanistic Network |
|--------------------|-------------------------|----------------------------|--------------------|--------------------|---------------------------------------------------------------------------------------------------------------------------------------------------------------------------------------------------------------------------------------------------|---------------------|
| Cg                 | complex                 | Activated                  | 3.485              | 4.4E-18            | ACTA2,AKR1C3,BMP2,BTG3,CCL2,CEBPB,CNPY4,CXCL8,ESM1,FHL1,FYN,G0S2,HIF1A,HK2,HSD11B1,ICAM1,IER3,IL11,IL1B,LIF,MARCH3,MMP1,NOS2,NRP1,PLAT,PLAUR,PRLR,PTGS2,PTX3,RGS2,SFRP4,STEAP1,TGFBR3,TMEM158,TNFAIP6,VEGFA                                       | 139 (18)            |
| IL6                | cytokine                | Activated                  | 4.201              | 8.1E-18            | ABCC3,BCL3,BMP2,C5AR1,CCL2,CCL20,CD82,COL3A1,CTSK,CXCL2,CXCL6,ICAM1,IL1RN,IL6,IL7R,IRF1,LBP,MMP10,MMP13,NAMPT,NFKBIA,NOS2,ORM1,PTGS2,SAA1,SERPINA1,SLC39A14,SLC40A1,SOCS1,STAT4,TGM2,THBS1,TNFRSF1B,VEGFA                                         | 152 (15)            |
| Alpha catenin      | group                   | Inhibited                  | -3.55              | 9.3E-18            | BCL3,BIRC3,COL3A1,COL6A3,CXCL2,CXCL6,IL1B,IL6,IRF1,MMP13,NFKBIA,NFKBIZ,NOV,PTGS2,PTX3,S100A9,SAA1,STEAP2,TGM2,TNFAIP3,TNFAIP6,TWIST1,ZEB2                                                                                                         | 82 (7)              |
| JUN                | transcription regulator | Activated                  | 3.213              | 1.3E-17            | BIRC3,CCL2,CCL8,CD44,CXCL1,CXCL5,CXCL8,DIO2,FTH1,ICAM1,IL1B,IL24,IL6,IL7R,LIF,MMP1,MMP10,MMP13,MT2A,NFKBIA,NFKBIZ,NGF,NOS2,PLAUR,PTGS2,PTX3,SAA1,SERPINE1,VEGFA                                                                                   | 154 (17)            |
| TAB1               | enzyme                  | Inhibited                  | -2.883             | 1.4E-17            | BIRC3,CCL20,CFB,CH25H,CXCL8,GCH1,IFIT1,IL1B,IL6,MMP13,PTGS2,RGS2,SAA1                                                                                                                                                                             | 153 (18)            |
| IL4                | cytokine                | np                         | 1.549              | 1.6E-17            | ACSL1,ACTA2,ASS1,BCL3,CCL2,CCL20,CD38,CD44,CITED2,CRIP1,CTSK,CXCL6,CXCL8,GPM6B,HSD11B1,ICAM1,IER3,IL1B,IL1RN,IL24,IL6,IL7R,IRF1,KITLG,MMP1,MMP10,NFKBIA,NKX3-1,NOS2,PIM2,PLD1,PLOD2,PMP22,PRDM1,SLC29A1,SOCS1,STAT4,THY1                          | 152 (14)            |
| IL13               | cytokine                | np                         | -1.161             | 2.5E-17            | ACSL1,ALDH1A2,ATF3,CCL2,CCL20,CTGF,CTSK,CXCL1,CXCL2,CXCL5,CXCL6,CXCL8,G0S2,GAS6,GAS7,GPX3,GSN,HSD11B1,IL1B,IL1RN,IRAK3,KITLG,MMP13,NOS2,PID1,SERPINA1,SLC43A3,SOCS1,TGM2,THBS1,TNFRSF1B                                                           | 154 (15)            |
| ERBB2              | kinase                  | np                         | 1.919              | 3.1E-17            | ACSL4,BCL3,BIRC3,CCL20,CD82,CD9,CEBPB,COL6A3,COL7A1,CTGF,CXCL8,CYP4B1,ELF3,FSCN1,GAS6,GHR,GPX3,HIF1A,IL6,MMP1,MMP10,MMP13,NET1,NRP1,PLAUR,PTGS2,SERPINE1,SMTN,SRPX,STK17B,TA                                                                      | 163 (23)            |
| SMARCA4            | transcription regulator | np                         | 1.846              | 4.7E-17            | AHNAK,ANGPTL2,ARHGDI3,BAMBI,BMP4,CCL2,CD44,COL7A1,CTGF,CYP4B1,EBF1,F3,GPR68,ICAM1,ID3,IER3,IFIT1,IL11,IL1B,IL6,IL7R,IRF1,MAFF,MMP1,MT1H,NFKBIZ,NRP1,PLAT,PLAUR,PTX3,RGS2,SDC2,SEPP1,SERPINB7,SLC40A1,SLC43A3,SPINK1,SRPX,ST3GAL1,TAGLN,THY1,TRIM1 |                     |
| IRAK4              | kinase                  | np                         | 1.197              | 2.2E-16            | ATF3,BIRC3,CCL20,CXCL2,CXCL6,CXCL8,IL1B,IL6,IRF1,LIF,MAP3K8,NFKBIA,NFKBIZ,NOS2,RGS16,SOCS1,TNFAIP3,ZC3H12A                                                                                                                                        | 138 (13)            |

| Upstream Regulator | Molecule Type                     | Predicted Activation State | Activation z-score | p-value of overlap | Target Molecules                                                                                                                                                                                                                                                     | Mechanistic Network |
|--------------------|-----------------------------------|----------------------------|--------------------|--------------------|----------------------------------------------------------------------------------------------------------------------------------------------------------------------------------------------------------------------------------------------------------------------|---------------------|
| DUSP1              | phosphatase                       | Inhibited                  | -2.334             | 8.2E-16            | BMP2,CIDEA,COL3A1,CXCL2,CXCL8,IER3,IL1B,IL1RN,IL6,NOS2,NRP1,PLAT,PRDM1,PTGS2,S100A9,SERPINE1,SOCS1,WISP2                                                                                                                                                             | 160 (20)            |
| IKBKG              | kinase                            | Activated                  | 2.985              | 1.2E-15            | BMP2,CEBPB,CH25H,CLDN23,CXCL2,CXCL6,CXCL8,GCH1,HK2,ICAM1,IL11,IL1B,IL1RN,IL6,NGF,PTX3,RGS16,SEMA3C,TNFAIP3,TNFRSF1B,VEGFA                                                                                                                                            | 93 (13)             |
| IL17A              | cytokine                          | Activated                  | 3.698              | 1.8E-15            | ACTA2,CCL2,CCL20,CEBPB,CTGF,CXCL1,CXCL2,CXCL5,CXCL6,CXCL8,ICAM1,IL1B,IL1RN,IL6,MMP13,NFKBIZ,NOS2,NRP1,PTGS2,RGS16,S100                                                                                                                                               | 169 (20)            |
| ERK                | group                             | Activated                  | 2.694              | 4.2E-15            | CCL2,COL3A1,CTGF,CXCL2,CXCL6,CXCL8,DIO2,FGF2,ICAM1,IL1B,IL6,LIF,MMP1,MMP13,NFKBIZ,PK4,PRDM1,PTGS2,RARB,SERPINE1,TGM2,THBS1                                                                                                                                           | 142 (19)            |
| CHUK               | kinase                            | Activated                  | 3.368              | 4.9E-15            | BMP2,CEBPB,CH25H,CLDN23,CXCL2,CXCL6,CXCL8,GCH1,HK2,ICAM1,IL11,IL1RN,IL6,NFKBIA,NGF,PTGS2,PTX3,RGS16,SEMA3C,TNFRSF1B,TWIST1, VEGFA                                                                                                                                    | 100 (12)            |
| MAP3K7             | kinase                            | np                         | -1.244             | 9.7E-15            | BIRC3,CCL20,CFB,CH25H,CXCL8,GCH1,IFIT1,IL1B,IL6,MMP13,RGS2,SAA1, SERPINE1                                                                                                                                                                                            | 154 (18)            |
| WNT5A              | cytokine                          | np                         | 0.53               | 1.2E-14            | ARHGDI1,CCL2,CD38,CXCL1,CXCL2,CXCL6,CXCL8,IL1B,IL6,LAMB3,MMP10,MMP13,NOS2,PGF                                                                                                                                                                                        | 170 (17)            |
| TNFRSF1A           | transmembrane receptor            | Activated                  | 3.662              | 2.3E-14            | ABCC3,CCL2,CCL20,CD44,CTGF,CXCL1,CXCL2,CXCL8,DIO2,GHR,ICAM1,IL1B,IL24,IL6,LBP,MMP13,SAA1,SERPINE1,VEGFA                                                                                                                                                              | 132 (16)            |
| NR3C2              | ligand-dependent nuclear receptor | np                         | 0.196              | 3.1E-14            | CNN3,COL3A1,CTGF,DDIT4,GHR,GPX3,IL1B,IL6,MT1H,NDRG2,NFIA,PGF, PTGS2,RGS2,RRAD,SEMA3C,SERPINE1,VEGFA                                                                                                                                                                  |                     |
| NR3C1              | ligand-dependent nuclear receptor | Inhibited                  | -2.145             | 3.3E-14            | BIRC3,C1QTNF1,CCL2,CD38,CEBPB,CIDEA,CRYAB,CXCL2,CXCL8,DDIT4,DNER,GLIPR1,GPX3,HSD11B1,ICAM1,IDH1,IER3,IL11,IL1B,IL24,IL6,IL7R,IRF1,MMP13,NAMPT,NFKBIA,NOD2,NOS2,PRLR,PTGS2,RGS2,SCG2,SEMA3C,SERPINA1,SERPINE1,STK17B,THBS1,TNFAIP3,TNFAIP6,TNFRSF1B,TNFRSF21,TRAF3IP2 | 182 (20)            |
| COL18A1            | other                             | Inhibited                  | -3.023             | 6E-14              | CCL2,DDIT4,F3,FGF2,HIF1A,ICAM1,ID3,IL6,MMP1,NOS2,NRP1,PTGS2,SERPINE1,THBS1,TNFRSF21,VEGFA                                                                                                                                                                            | 176 (23)            |
| SMAD4              | transcription regulator           | np                         | 0.673              | 8.4E-14            | ANGPT1,BMP2,BMP4,CCL20,CITED2,CTGF,FSCN1,ICAM1,IER3,IL1B,IRAK3,NAMPT,NFKBIA,PDGFRB,PILRA,PTGS2,PTX3,SERPINE1,THBS1,TNFAIP6, VEGFA                                                                                                                                    | 143 (17)            |
| ESR1               | ligand-dependent nuclear receptor | np                         | -0.355             | 8.6E-14            | AHNAK,AQP9,ASS1,BMP2,BMP4,CCL2,CCL20,CEBPB,CXCL8,DDIT4,GHR,GP1R,GREM1,HIF1A,IER3,IL1B,IL6,LBP,MALL,MMP1,NOS2,PRLR,PRSS23,PTGS2,PTX3,SERPINE1,SLC2A12,SLC39A8,SLC7A11,SLC7A2,SLC7A5, SULF1,TNFAIP3,TNFAIP6,VEGFA,WISP2                                                | 135 (17)            |

| Upstream Regulator | Molecule Type                     | Predicted Activation State | Activation z-score | p-value of overlap | Target Molecules                                                                                                                                                                      | Mechanistic Network |
|--------------------|-----------------------------------|----------------------------|--------------------|--------------------|---------------------------------------------------------------------------------------------------------------------------------------------------------------------------------------|---------------------|
| EZH2               | transcription regulator           | Activated                  | 2.811              | 1.2E-13            | BIRC3,BMP4,C15orf48,CD82,CXCL1,CXCL2,CXCL8,GPR68,IL11,IL24,IL6,NFKBIA,PIM2,PRICKLE1,PTGS2,RARRES3,S100A4,SA A1,SA A2,SERPINA1, TWIST1,VEGFA                                           | 129 (12)            |
| ERK1/2             | group                             | Activated                  | 2.683              | 2.8E-13            | AKR1C3,CCL2,CCL8,CD44,CEBPB,COL3A1,CTGF,CXCL8,F3,FGF2,ICAM1,IFIT1,IL11,IL1B,IL6,MMP1,MMP13,NAMPT,NOS2,PTGS2,SERPINE1,TREM1,VEGFA                                                      | 132 (16)            |
| PI3K (complex)     | complex                           | Activated                  | 3.467              | 3.8E-13            | ABCC4,CEBPB,CXCL8,FBXO32,HIF1A,IFIT1,IL1B,IL1RN,IL6,IL7R,MMP13,NOS2,PRDM1,PTGS2,PTPN12,RGS2,SERPINE1,TGM2,TNFAIP3,TREM1,                                                              | 152 (18)            |
| CEBPA              | transcription regulator           | Activated                  | 2.122              | 4.4E-13            | ACSL1,AKR1B1,AKR1C3,ASS1,CCL20,CEBPB,CXCL8,FHL1,G0S2,GCH1,GLIPR1,HSD11B1,IER3,IL1RN,IL6,KCNMB1,MT2A,NRP1,PLOD2,PPP1R3C,PRDM1,PRLR,PTGS2,PTX3,RGS2,S100A9,SA A1,SERPINE1,THBS1,TNFAIP6 | 120 (10)            |
| ECSIT              | transcription regulator           | Activated                  | 3.241              | 5E-13              | BCL3,CD44,CXCL8,IER3,IL1B,IL1RN,IL6,NFKBIA,PLAUR,PTGS2,TNFAIP3                                                                                                                        | 96 (13)             |
| HIF1A              | transcription regulator           | Activated                  | 2.346              | 7.6E-13            | ACTA2,CD44,CTGF,CXCL2,CXCL8,FHL1,FSCN1,FYN,GPER1,HIF1A,HIST2H2AC,HK2,HSPB1,IL1B,IL6,NOS2,NOV,PIM2,PLOD2,PTGS2,SCG2,SERPINE1,SLC25A37,SLC29A1,SLC40A1,SULF1,VEGFA                      | 174 (24)            |
| HMOX1              | enzyme                            |                            | -1.669             | 8.2E-13            | ANGPT1,CCL2,CXCL1,CXCL5,CXCL8,ICAM1,ID3,IL1B,IL1RN,IL6,NOS2,PTGS2,THBS1,TYMP,VEGFA                                                                                                    | 176 (22)            |
| FOXL2              | transcription regulator           | Activated                  | 3.05               | 1.6E-12            | ATF3,BMP2,CCL20,CH25H,CXCL2,CYP26B1,ICAM1,IER3,IL11,LIF,MAFF,PTGS2,RGS2,TNFAIP3                                                                                                       |                     |
| NFKB1              | transcription regulator           | Activated                  | 2.301              | 1.7E-12            | BAMBI,BMP2,CCL20,CD82,CFB,CXCL2,CXCL8,ELF3,FSCN1,IL1B,IL1RN,IL6,IRF1,MAP3K8,NFKBIA,NOS2,PI3,PTGS2,PTX3,VEGFA                                                                          | 126 (16)            |
| IL10RA             | transmembrane receptor            | Inhibited                  | -4.041             | 2.9E-12            | ACSL1,ASS1,BMP2,BMP4,CFB,DDIT4,FHL1,GAS6,GHR,GSTM1,IL1RN,IRF1,KITLG,NAMPT,NDRG2,NOS2,NOV,P3H2,PLA2G16,PMP22,RIPK3,SCIN,SLC2A6,SLC7A11,SORBS2,TGM2,TREM1                               |                     |
| OSM                | cytokine                          | Activated                  | 3.004              | 3.1E-12            | ABCC3,ABCC4,ACTA2,CCL2,CCL20,CXCL2,HIF1A,IL1B,IL6,LBP,MMP1,MMP10,MMP13,SERPINA1,VEGFA                                                                                                 | 175 (19)            |
| Jnk                | group                             | Activated                  | 3.119              | 3.4E-12            | ACTA2,ALDH1A2,BIRC3,CCL2,COL3A1,CTGF,CXCL6,CXCL8,FBXO32,ICAM1,IL1B,IL6,MMP1,MMP13,NOS2,PTGS2,SERPINE1,TGM2                                                                            | 159 (17)            |
| PPARG              | ligand-dependent nuclear receptor | np                         | 0.117              | 6E-12              | ACSL1,ACSL4,ACTA2,ALDH1A2,CCL2,CIDEA,CXCL2,CXCL6,CXCL8,CYP4B1,DHRS3,HK2,ICAM1,IDH1,IL1B,IL6,INSIG2,LAMB3,NOS2,PDK4,PID1,PRDM1,PTGS2,RGL1,SA A1,SERPINA1,SERPINE1,SOCS1,TGFBR2,VEGFA   | 132 (17)            |

| Upstream Regulator | Molecule Type           | Predicted Activation State | Activation z-score | p-value of overlap | Target Molecules                                                                                                                                                                                                                          | Mechanistic Network |
|--------------------|-------------------------|----------------------------|--------------------|--------------------|-------------------------------------------------------------------------------------------------------------------------------------------------------------------------------------------------------------------------------------------|---------------------|
| EGFR               | kinase                  | Activated                  | 3.006              | 6E-12              | CEBPB,CTGF,CXCL8,F3,ICAM1,IL1B,IL6,IRF1,MMP1,MMP13,NOS2,PLAUR,PTGS2,SERPINE1,TGM2,TNFAIP6,VEGFA,ZEB2                                                                                                                                      | 165 (19)            |
| HGF                | growth factor           | Activated                  | 2.309              | 7.1E-12            | ACTA2,BIRC3,CCL2,CD44,COL3A1,CTGF,CTSK,CXCL2,CXCL8,ELF3,ICAM1,IL6,MMP1,PLAUR,PTGS2,PTPN2,S100A9,THBS1,VEGFA                                                                                                                               | 136 (18)            |
| IL1R1              | transmembrane receptor  | Activated                  | 2.758              | 1.4E-11            | ABCC3,CXCL1,CXCL2,CXCL8,ICAM1,IL1B,IL6,LBP,NOS2,ORM1,PTGS2,SAA1                                                                                                                                                                           | 136 (16)            |
| TNFSF12            | cytokine                | Activated                  | 3.211              | 1.6E-11            | CCL2,CXCL2,CXCL6,CXCL8,FBXO32,ICAM1,IL1B,IL6,MMP1,MMP10,MM P13,NFKBIA,PTX3,S100A9                                                                                                                                                         | 151 (17)            |
| SP1                | transcription regulator | np                         | 1.192              | 2.1E-11            | ACSL1,ACTA2,ATF3,BMP4,CCL2,CCL20,CD79B,CEBPB,CITED2,COL7A1,CRYAB,CXCL8,CYBRD1,FGF2,GHR,HIF1A,HK2,PLAUR,PRLR,PTGS2,SERPINE1,SLC11A2,SLC22A4,SLC2A12,SLC39A8,SOCS1,TGFBR2,VEGFA,ZEB2                                                        | 186 (18)            |
| EP300              | transcription regulator | np                         | 1.732              | 2.4E-11            | ADORA2A,ANGPT1,CCL2,CNN3,CRIM1,CXCL8,DHRS3,EVI2A,FNDC3B,HSD11B1,ID3,IL6,IL7R,MAP3K8,MME,MMP1,NKX3-1,NOS2,PDGFRB,PDK4,PRLR,PTGS2,RGL1,SLC7A11,STAT4,TNFAIP3                                                                                | 145 (19)            |
| MYC                | transcription regulator | np                         | -0.686             | 2.6E-11            | ABCC3,ABCC4,ACAN,ACSL4,ANGPT1,CD44,COL3A1,COL6A3,CRYAB,CS PG4,DDIT4,EBF1,FBXO32,FTH1,GAMT,HIF1A,HK2,HSPB1,IDH1,LAMB3,NFKBIA,NGF,NRP1,PCDH18,PDGFRB,PLAUR,PMP22,PRDM1,SAT1,SE RPINE1,SHMT1,SLC22A4,SLC7A5,SMS,ST3GAL1,THBS1,THY1,VEGFA,WLS | 168 (13)            |
| TP73               | transcription regulator | np                         | 0.124              | 3.2E-11            | ACTA2,ATF3,CCL2,CNN3,CRYAB,CXCL1,CXCL2,DDIT4,DHRS3,FGF2,IL 1B,IL6,MINOS1-BL1/NBL1,MMP13,MT1B,PIEZO2,PMP22,SAT1,SERPINA1,                                                                                                                  | 185 (19)            |
| CEBPB              | transcription regulator | np                         | 1.67               | 3.8E-11            | ACTA2,AKR1C3,CDO1,CEBPB,CXCL8,FBXO32,FHL1,HSD11B1,IER3,IL1 1RA,IL1B,IL24,IL6,MMP1,MMP10,NFE2L1,NOS2,NRP1,PDK4,PI3,PLAUR,PRLR,PTGS2,SAA2,SERPINE1                                                                                          | 149 (17)            |
| CD40LG             | cytokine                | Activated                  | 3.564              | 4.8E-11            | BIRC3,CCL2,CCL20,CXCL8,GCH1,ICAM1,IL1B,IL6,IRF1,NAMPT,NFKBIA,NOS2,PRDM1,PTGS2,TNFAIP3,VEGFA                                                                                                                                               | 135 (14)            |
| TLR3               | transmembrane receptor  | Activated                  | 3.279              | 6E-11              | ATF3,CCL20,CD38,CFB,CTSK,CXCL2,CXCL8,GCH1,IER3,IFIT1,IL1B,IL6,IRF1,MAP3K8,NFKBIZ,NOS2,PTGS2,PTX3,RARB,SERPINE1,TNFRSF1B                                                                                                                   | 154 (15)            |
| FSH                | complex                 | Activated                  | 2.42               | 7.7E-11            | ACTA2,ALDH3A2,CH25H,CTGF,DHRS3,DLX5,DNAJB9,HK2,HSD11B1,IL1RN,IL6,MINOS1-NBL1/NBL1,MT1H,MT2A,MT3,PLPP1,PRLR,PTGS2,RGS16,TGFBR3,THBS1,TNFAIP3,TNFAIP6,TPM2,TUBA1A,VEGFA                                                                     | 116 (10)            |
| EGF                | growth factor           | Activated                  | 3.026              | 9.8E-11            | ACSL4,CD44,CEBPB,CXCL8,ELF3,HIF1A,MMP10,NGF,PTGS2,PTPN12,S100A4,SERPINA1,SERPINE1,ST3GAL1,TGFBR2,VEGFA                                                                                                                                    | 158 (19)            |
| PTGS2              | enzyme                  | Activated                  | 3.268              | 1E-10              | ANG,ANGPT1,BIRC3,CCL2,CXCL5,CXCL8,ICAM1,IL11,IL1B,IL6,MMP1,N OS2,PTGS2,ST3GAL1,TGM2,TNFAIP6,VEGFA                                                                                                                                         | 160 (17)            |

| Upstream Regulator | Molecule Type                     | Predicted Activation State | Activation z-score | p-value of overlap | Target Molecules                                                                                                                                                       | Mechanistic Network |
|--------------------|-----------------------------------|----------------------------|--------------------|--------------------|------------------------------------------------------------------------------------------------------------------------------------------------------------------------|---------------------|
| EHF                | transcription regulator           | np                         | 1.994              | 1.3E-10            | BMP4,CCL20,GPR68,IL1RN,IL6,MMP1,PLAT,PLAUR,S100A9,SAA1,SAA2, SERPINE1,THY1,VEGFA                                                                                       |                     |
| CLDN7              | other                             | np                         | -1.069             | 1.6E-10            | ARHGDIB,CA12,CCL20,CTGF,CXCL8,F3,HIST2H2AA3/HIST2H2AA4, HIST2H2AC,MT2A,PANX2,PLA2G16,PLGRKT,PQLC3,SERPINE7                                                             |                     |
| STAT6              | transcription regulator           | np                         | 1.123              | 1.8E-10            | ACSL1,BCL3,CCL20,CD38,CRIP1,CXCL2,GPM6B,IL1RN,IL24,IL6,IRF1,JA K2,MMP13,NFKBIA,PDK4,PIM2,PLD1,PTGS2,SERPINA1,SOCS1,STAT4                                               | 151 (16)            |
| IL18               | cytokine                          | Activated                  | 3.546              | 2.2E-10            | CCL2,CCL20,CD44,CXCL8,ICAM1,IL1B,IL6,MMP1,MMP13,NFKBIZ,NOS2, PTGS2,TGFBR2,VEGFA                                                                                        | 162 (19)            |
| IL10               | cytokine                          | np                         | -1.106             | 2.8E-10            | ACTA2,BCL3,CCL20,CD44,CXCL2,CXCL6,CXCL8,ICAM1,IL1B,IL1RN,IL24 ,IL6,NOS2,PTGS2,SOCS1,TNFRSF1B,TWIST1,VEGFA                                                              | 138 (17)            |
| GSK3B              | kinase                            | Activated                  | 2.225              | 2.9E-10            | BIRC3,CCL2,CD82,CXCL6,HIF1A,IL1B,IL6,NFKBIZ,NOS2,PMP22,PTGS2, SERPINE1                                                                                                 | 153 (19)            |
| F7                 | peptidase                         | Activated                  | 2.053              | 3.9E-10            | CTGF,CXCL2,CXCL8,F3,IL1B,LIF,MMP13,PLAUR,VEGFA                                                                                                                         | 87 (7)              |
| ARRB2              | other                             |                            | -1.432             | 3.9E-10            | CXCL2,F3,HIF1A,IL1B,IL6,NFKBIZ,PTGS2,SERPINE1,VEGFA                                                                                                                    | 165 (20)            |
| NLRP12             | other                             | Inhibited                  | -2.922             | 3.9E-10            | BCL3,CXCL2,CXCL6,CXCL8,ICAM1,IL1B,IL1RN,IL6,NOS2                                                                                                                       | 152 (17)            |
| TGFA               | growth factor                     | Activated                  | 2.433              | 4.8E-10            | BIRC3,CCL20,CEBPB,CXCL2,CXCL8,IL6,PTGS2,SERPINA1,SERPINE1, VEGFA                                                                                                       | 157 (20)            |
| NEUROG1            | transcription regulator           | np                         | -0.577             | 5.5E-10            | ASS1,CD82,COL3A1,CXCL1,GFPT2,GREM1,IL6,S100A4,SCG2,SLC43A3, SULF1,THBS1                                                                                                |                     |
| SPI1               | transcription regulator           | np                         | 0.308              | 6E-10              | CD79B,CTSK,EBF1,EPB41L2,FTH1,IL1B,IL1RN,IL24,IL7R,IRAK3,MME,MT 1B,MT1H,MT2A,NOS2,PTGS2,TREM1                                                                           | 60 (5)              |
| TLR9               | transmembrane receptor            | Activated                  | 2.941              | 6.5E-10            | ATF3,CD38,CXCL8,FCMR,GCH1,IER3,IFIT1,IL1B,IL6,IRF1,NAMPT,NFKBI Z, NOS2,PRDM1,PTGS2,SERPINE1,SOCS1,TNFRSF1B,UAP1                                                        | 151 (17)            |
| PRKCD              | kinase                            | Activated                  | 3.45               | 6.8E-10            | BIRC3,CCL20,CEBPB,CXCL8,ICAM1,IL1B,IL1RN,IL32,IL6,LAMB3,LIF,MM P13,NFKBIA,NOS2,SERPINE1,SOCS1,VEGFA                                                                    | 142 (16)            |
| IL1RN              | cytokine                          | Inhibited                  | -3.098             | 7.8E-10            | ACTA2,ATF3,CCL20,CD44,HSD11B1,ICAM1,IL1B,IL32,IL6,IRF1,LIF,MMP1 , PTGS2,SERPINE1                                                                                       | 163 (15)            |
| F2                 | peptidase                         |                            | 1.961              | 8.3E-10            | CD44,CTGF,CXCL8,ICAM1,IL1B,IL6,MMP1,NOS2,PTGS2                                                                                                                         | 152 (17)            |
| TREM2              | transmembrane receptor            | Inhibited                  | -2.383             | 8.4E-10            | CXCL2,IL1B,IL6,NFKBIA,PTGS2,TNFAIP3,TREM1                                                                                                                              |                     |
| FGF2               | growth factor                     | np                         | 1.544              | 8.5E-10            | ACTA2,CCL20,FGF2,FTH1,ID3,IL6,MMP1,S100A4,SCG2,SERPINE1,SPIN K1, ST3GAL1,TAGLN,TGFBR3,VEGFA                                                                            | 134 (18)            |
| AR                 | ligand-dependent nuclear receptor | np                         | 1.057              | 1.1E-09            | ABCC4,AK3,AKR1C3,COL3A1,DNAJB9,GSN,GSTM1,IL6,KITLG,MME,NK X3-1,PIGA,PLAT,PLOD2,SERPINE1,SLC39A8,SLC7A11,SLCO3A1,SMTN, SPINK1,TGFBR2,THBS1,TMEM158,TPD52L1,TWIST1,VEGFA | 91 (7)              |



| Upstream Regulator | Molecule Type           | Predicted Activation State | Activation z-score | p-value of overlap | Target Molecules                                                                                                                                                                 | Mechanistic Network |
|--------------------|-------------------------|----------------------------|--------------------|--------------------|----------------------------------------------------------------------------------------------------------------------------------------------------------------------------------|---------------------|
| KRAS               | enzyme                  | Activated                  | 2.211              | 1.1E-09            | ABCC4,BIRC3,CD44,CEBPB,COL3A1,CRYAB,CXCL8,FTH1,GSN,HIF1A,IL1B,IL1B,LAMB3,MINOS1-NBL1/NBL1,MMP10,NOS2,PLAT,PLD1,S100A4, TGFBR2,THBS1,THY1                                         | 174 (21)            |
| NOD2               | other                   | Activated                  | 2.492              | 1.2E-09            | ACSL1,CCL2,CXCL2,CXCL8,ICAM1,IL1B,IL6,NFKBIA,NOS2,SLC2A6,TWIST1                                                                                                                  | 90 (15)             |
| MIF                | cytokine                | Activated                  | 3.516              | 1.3E-09            | ACTA2,CD44,CXCL2,CXCL8,HIF1A,ICAM1,IL11,IL1B,IL6,IL7R,MMP1,MMP13,NOS2                                                                                                            | 164 (20)            |
| APOE               | transporter             | np                         | -0.726             | 1.7E-09            | ACTA2,BMP4,C5AR1,CD44,CTGF,CTSK,F3,GPX3,HSD11B1,ICAM1,IL1B,IL1RN,IL6,NOS2,PTGS2,PTX3,S100A9,SERPINE1,STAT4,THY1                                                                  | 145 (16)            |
| AGER               | transmembrane receptor  | Activated                  | 2.607              | 1.9E-09            | CCL2,CTSK,F3,ICAM1,IFIT1,IL1B,IL6,PTGS2,S100A9,SERPINE1,VEGFA                                                                                                                    | 163 (19)            |
| IGF1               | growth factor           | np                         | 1.262              | 2.4E-09            | ACTA2,BMP2,BMP4,CXCL8,F3,FBXO32,GHR,HIF1A,IL1B,IL6,MMP13,PLAUR,PRLR,SERPINE1,THY1,TWIST1,VEGFA                                                                                   | 148 (18)            |
| CTNNB1             | transcription regulator | np                         | 1.24               | 2.8E-09            | ALDH1A2,ALDH3A2,BMP2,BMP4,CCL7,CD44,CRIP1,CTGF,CXCL8,DIO2,ENPP1,FCER1G,GHR,GREM1,ID3,IL1B,MME,MMP1,NDRG2,NOS2,OSBP L1A,PMP22,PRDM1,PTGS2,SAA1,SEMA3C,SERPINA1,SERPINE1,SMS,VEGFA | 166 (19)            |
| TLR2               | transmembrane receptor  | Activated                  | 3.264              | 3E-09              | ATF3,CCL2,CXCL2,CXCL8,ICAM1,IL1B,IL1RN,IL6,IRF1,MMP13,NOS2,PTGS2,SLC40A1,SLC7A11,SOCS1                                                                                           | 136 (17)            |
| F3                 | transmembrane receptor  | np                         | 1.225              | 3E-09              | ANGPT1,CXCL8,F3,ICAM1,IL1B,IL6,VEGFA                                                                                                                                             | 90 (9)              |
| NREP               | other                   | np                         | -0.416             | 3E-09              | ACTA2,COL3A1,FGF2,PDGFRB,TAGLN,TGFBR2,VEGFA                                                                                                                                      |                     |
| VCAN               | other                   | Inhibited                  | -2.882             | 3.3E-09            | ANG,ASS1,CCL20,CEBPB,CIDEA,CXCL2,CXCL6,F3,ICAM1,IL1RN,LBP,NFKBIA,OLFML2B,RGS2,VEGFA                                                                                              | 96 (12)             |
| estrogen receptor  | group                   | np                         | -0.59              | 3.8E-09            | CD44,CLDN23,COL12A1,COL7A1,CTGF,CXCL1,CXCL8,ICAM1,IL6,MMP1                                                                                                                       | 154 (18)            |
| TGFBR2             | kinase                  | np                         | -0.169             | 3.9E-09            | ACTA2,C5AR1,CD44,CTGF,CXCL2,CXCL6,ICAM1,IL1B,MMP10,MMP13,MYOF,NFIB,NRP1,SERPINE1,TGFBR2,TGIF1,VEGFA                                                                              | 153 (18)            |
| IFNLR1             | transmembrane receptor  | np                         |                    | 4.1E-09            | ATF3,CCL20,CXCL2,CXCL6,IL1B,IL6,LIF,PTGS2,THBS1,TNFAIP3                                                                                                                          | 104 (11)            |
| PPRC1              | transcription regulator | Activated                  | 3.101              | 5.2E-09            | CCL20,CXCL8,DDIT4,ESM1,HK2,LAMB3,NAMPT,NFKBIZ,PTGS2,SPINK1                                                                                                                       |                     |
| Immunoglobulin     | complex                 | Activated                  | 3.273              | 5.3E-09            | BCL3,CCL2,CCL7,CCL8,CXCL2,F3,IL1B,IRF1,MAFF,NFKBIA,NOS2                                                                                                                          | 135 (16)            |
| Ap1                | complex                 | np                         | 1.412              | 5.3E-09            | CXCL8,DLX5,F3,IL6,MMP1,MMP13,MT2A,NGF,PRDM1,S100A4,SERPINE1                                                                                                                      |                     |

| Upstream Regulator | Molecule Type           | Predicted Activation State | Activation z-score | p-value of overlap | Target Molecules                                                                                                                               | Mechanistic Network |
|--------------------|-------------------------|----------------------------|--------------------|--------------------|------------------------------------------------------------------------------------------------------------------------------------------------|---------------------|
| IFNAR1             | transmembrane receptor  | np                         | 1.387              | 6.1E-09            | ATF3,CCL20,CH25H,CXCL2,CXCL6,IL1B,IL6,LIF,NOS2,PLAT,PTGS2,SOCS1,THBS1,TNFAIP3                                                                  | 123 (15)            |
| PIK3R1             | kinase                  | Activated                  | 2.36               | 6.4E-09            | CXCL8,F3,GCH1,HIF1A,ICAM1,IL1B,IL6,NFE2L1,NOS2,PDGFRB,PTGS2                                                                                    | 167 (20)            |
| CREBBP             | transcription regulator | np                         |                    | 6.6E-09            | ADORA2A,ANGPT1,CD44,CNN3,CRIM1,CXCL8,DHRS3,EVI2A,FNDC3B,HSD11B1,IL6,IL7R,IRF1,MAP3K8,PDGFRB,PTGS2,RGL1,RGS2,SLC7A11,STAT4,TAGLN,TNFAIP3,TWIST1 | 66 (5)              |
| EGR1               | transcription regulator | Activated                  | 3.012              | 6.9E-09            | ACTA2,ATF3,CCL2,CD44,CXCL2,CXCL6,CXCL8,F3,ICAM1,IL1B,SERPINE1,SOCS1,THBS1,VEGFA                                                                | 137 (14)            |
| CCL2               | cytokine                | np                         | 1.182              | 7.6E-09            | ACTA2,CCL2,CXCL8,ICAM1,IL1B,IL6,MMP1,SERPINE1,SLC40A1                                                                                          | 160 (18)            |
| PDLIM2             | other                   | np                         | 1.941              | 9.2E-09            | CCL2,CITED2,CXCL8,FOXRED2,FXVD6,GHR,GSTM1,MME,PRUNE2,SLC40A1,SLC43A3,STAT4,TAGLN                                                               |                     |
| IFNB1              | cytokine                | np                         | 0.364              | 9.9E-09            | CCL2,COL12A1,CRYAB,CXCL2,CXCL8,FGF2,IFIT1,IL24,IL6,IRF1,MGST2,NOD2,NOS2,PKK4,SLC39A14,SOCS1,THBS1                                              | 116 (15)            |
| TMEM173            | other                   | np                         | 1.89               | 1E-08              | C15orf48,CXCL2,GAS7,HOPX,IL1B,IL6,LIF,NOS2,RGS16                                                                                               | 138 (18)            |
| JAG2               | growth factor           | np                         | -1.744             | 1E-08              | BMP2,CCL20,CEBPB,CXCL1,CXCL5,CXCL6,IL1B,IL1RN,IL6                                                                                              |                     |
| JUND               | transcription regulator | np                         |                    | 1E-08              | F3,FTH1,IL11,MMP1,MMP13,NOS2,SAT1,SOCS1,VEGFA                                                                                                  | 128 (14)            |
| Pkc(s)             | group                   | np                         | 1.574              | 1.1E-08            | ATF3,CCL2,COL3A1,CXCL8,F3,FGF2,GPER1,IL6,MMP1,NOS2,PTGS2,RGS2,SERPINE1,VEGFA                                                                   | 153 (19)            |
| Mek                | group                   | Activated                  | 2.634              | 1.2E-08            | CXCL8,GPER1,HIF1A,HSPB1,IER3,IL1B,IL6,MAFF,MMP13,NGF,PDGFRB,PTGS2,SEMA3C,SERPINE1,SLC43A3,TNFAIP3                                              | 165 (21)            |
| LIF                | cytokine                | np                         | 1.508              | 1.4E-08            | AHNAK,CD9,CEBPB,CXCL2,ELF3,HK2,IL1B,IL6,IRF1,PLD1,PTGS2,RHOU,SOCS1                                                                             | 137 (19)            |
| NRIP1              | transcription regulator | np                         | 1.091              | 1.5E-08            | CIDEA,CYP4B1,IL1B,IL6,PKK4,PTGS2,PTX3,RARB,SLC16A10,TNFAIP6                                                                                    |                     |
| RBPJ               | transcription regulator | Inhibited                  | -2.168             | 1.8E-08            | BMP2,CD44,FGF2,GDF5,IL1B,IL6,IL7R,KITLG,LIF,MMP13,NGF,PGF,PRDM1,VEGFA                                                                          | 73 (6)              |
| FOS                | transcription regulator | Activated                  | 2.271              | 1.8E-08            | AKR1C3,CCL2,CD44,CXCL8,DIO2,ESM1,F3,FTH1,ICAM1,IL11,MMP1,MM P10,MMP13,NET1,NGF,PLD1,PRDM1,PTGS2,PTPN12,S100A9,SERPINE1,TREM1,VEGFA             | 98 (12)             |
| EGLN1              | enzyme                  | np                         | 0.895              | 1.9E-08            | CCL20,HIF1A,ICAM1,IL1B,IL6,MMP13,NGF,PTGS2,TGFB2,VEGFA                                                                                         | 160 (14)            |
| POU2F1             | transcription regulator | np                         |                    | 2E-08              | ACSL1,CDO1,CXCL8,DDIT4,GAS6,GPX3,GSTM1,ICAM1,IDH1,IL6,SEPP1,SLC7A11                                                                            |                     |
| TBK1               | kinase                  | Activated                  | 2.211              | 2.2E-08            | CXCL2,CXCL8,ICAM1,IFIT1,IL6,NFKBIZ,PTGS2,RGCC,SLCO3A1,VEGFA,ZC3H12A                                                                            | 109 (14)            |
| BMP4               | growth factor           | np                         | -1.495             | 2.3E-08            | ACTA2,BMP2,BMP4,DLX5,GREM1,IL6,NOS2,TAGLN,TGM2,VEGFA                                                                                           | 156 (17)            |

| Upstream Regulator | Molecule Type              | Predicted Activation State | Activation z-score | p-value of overlap | Target Molecules                                                                                                                                     | Mechanistic Network |
|--------------------|----------------------------|----------------------------|--------------------|--------------------|------------------------------------------------------------------------------------------------------------------------------------------------------|---------------------|
| MAPK9              | kinase                     | np                         | 1.993              | 2.6E-08            | BIRC3,BMP4,CCL2,CEBPB,DIO2,GSTM1,HIF1A,IL11,IL1B,IL6,LIF,PLAT,PTX3,SERPINA1,TNFAIP3                                                                  | 130 (17)            |
| TERT               | enzyme                     | np                         | 1.414              | 2.7E-08            | ATF3,CXCL8,FGF2,IFIT1,IL1B,IL6,MMP1,MMP10,NFKBIA                                                                                                     | 137 (16)            |
| SQSTM1             | transcription regulator    | np                         | -0.523             | 3.4E-08            | CITED2,CXCL2,IL1B,IL6,IRF1,NFKBIA,NOS2,PLAT,RGCC                                                                                                     | 92 (15)             |
| GNA13              | enzyme                     | np                         |                    | 3.5E-08            | ACTA2,CXCL8,PTGS2,TAGLN,VEGFA                                                                                                                        | 61 (6)              |
| NFE2L2             | transcription regulator    | np                         | 1.108              | 4E-08              | ABCC3,ANG,COL3A1,CTGF,CTSK,CXCL2,CXCL6,CXCL8,DSTN,FTH1,GHR,GSTM1,IL1B,IL1RN,IL6,NFE2L1,NOS2,PTGS2,SAA1,SCG2,SERPINE1,                                | 148 (19)            |
| BCL6               | transcription regulator    | Inhibited                  | -2.184             | 4.2E-08            | ACAN,BCL3,CD44,CD79B,EPB41L2,FGF2,FTH1,IL1B,IL24,IL6,IL7R,PRDM1,SERPINE1                                                                             | 104 (8)             |
| APP                | other                      | Activated                  | 2.915              | 4.2E-08            | BMP4,CCL20,CDK5RAP2,CTGF,CXCL2,DSTN,FGF2,GHR,GPM6B,HIST1H2BD,IL1B,IL6,LBP,MME,NOS2,NRP1,PLAT,PRLR,PTGS2,SERPINE1,SLC11A2,SLC7A11,SOCS1,TUBA1A,TUBB2B | 140 (15)            |
| KLF6               | transcription regulator    | np                         | 1.428              | 4.3E-08            | ATF3,CCL2,CXCL2,CXCL8,IL1B,NFKBIA,NOS2,PTGS2,VEGFA                                                                                                   | 146 (17)            |
| MAPK8              | kinase                     | np                         | 1.334              | 4.5E-08            | ACSL4,BIRC3,BMP4,CEBPB,DIO2,GSTM1,IL1B,IL6,LIF,PTGS2,PTX3,TNFAIP3                                                                                    | 139 (19)            |
| NOTCH1             | transcription regulator    | Activated                  | 2.058              | 4.7E-08            | ACTA2,BMP2,CD44,CD82,ICAM1,IL6,IRF1,NOS2,RHO,SOCS1,TAGLN,TGFBR2,TGFBR3                                                                               | 144 (20)            |
| ACVRL1             | kinase                     | np                         | -1.671             | 4.7E-08            | CXCL8,PLAT,PLAUR,SERPINE1,TAGLN,VEGFA                                                                                                                |                     |
| PRKCA              | kinase                     | Activated                  | 2.375              | 4.8E-08            | ARHGDI3,CCL2,CXCL2,ID3,MMP1,NOS2,PLD1,PTGS2,S100A9,SERPINE1,VEGFA                                                                                    | 159 (19)            |
| PGF                | growth factor              | Activated                  | 2.4                | 5E-08              | CCL2,CCL20,CXCL8,IL1B,IL6,JAK2,SERPINE1                                                                                                              | 127 (18)            |
| GJA1               | transporter                |                            | -1.091             | 5E-08              | BMP2,BMP4,IL1B,NOS2,NOV,THBS1,VEGFA                                                                                                                  | 76 (7)              |
| RET                | kinase                     | Activated                  | 2.8                | 5.4E-08            | CCL2,CCL20,CXCL8,IL1B,IL6,MMP1,MMP10,PLAUR,S100A9                                                                                                    | 157 (20)            |
| FOSL1              | transcription regulator    | Activated                  | 2.213              | 6.8E-08            | CD44,CXCL8,IL6,MMP1,MMP10,MMP13,PLAUR,SERPINE1                                                                                                       | 15 (3)              |
| MAP2K3             | kinase                     | Activated                  | 2.182              | 6.8E-08            | CCL8,CTSK,ICAM1,IL1B,IL6,NOS2,SERPINE1,VEGFA                                                                                                         | 152 (16)            |
| ADORA2B            | g-protein coupled receptor | np                         | 1.429              | 6.8E-08            | CXCL2,CXCL8,HIF1A,IL1B,IL6,PDE5A,SERPINE1,VEGFA                                                                                                      | 155 (22)            |
| NOS3               | enzyme                     | np                         | -0.877             | 7.2E-08            | CTGF,F3,ICAM1,IL6,NOS2,PDE5A,PTGS2                                                                                                                   | 150 (17)            |
| EIF2AK2            | kinase                     | np                         | 1.289              | 7.5E-08            | CEBPB,CXCL8,IFIT1,IL1B,IL6,IRF1,MT1M,NFKBIA,NOS2,TNFAIP3,TUBA1A                                                                                      | 119 (15)            |
| GH1                | growth factor              | np                         | 1.103              | 7.7E-08            | ACSL1,AKR1B1,ATF3,BMP2,BMP4,COL3A1,FTH1,GHR,IRF1,NDRG2,NOS2,PLA2G16,PRLR,TUBA1A                                                                      | 116 (10)            |
| CTSB               | peptidase                  | np                         | 1.445              | 8.1E-08            | ACTA2,CXCL2,IL1B,NOS2,PLAUR,VEGFA                                                                                                                    | 130 (17)            |

| Upstream Regulator | Molecule Type                     | Predicted Activation State | Activation z-score | p-value of overlap | Target Molecules                                                                                                             | Mechanistic Network |
|--------------------|-----------------------------------|----------------------------|--------------------|--------------------|------------------------------------------------------------------------------------------------------------------------------|---------------------|
| FBXO32             | enzyme                            | Inhibited                  | -2.449             | 8.1E-08            | CCL20,CXCL2,CXCL6,IL1B,IL6,PTGS2                                                                                             |                     |
| Hdac               | group                             | np                         | -0.35              | 8.5E-08            | ATF3,BMP2,CXCL8,FBXO32,HIF1A,IL6,MT1B,MT1H,NRP1,PGF,RARB,SEMA3C,TGFBR2,ZEB2                                                  | 58 (4)              |
| AHR                | ligand-dependent nuclear receptor | np                         | 0.407              | 8.6E-08            | ACTA2,ATOH8,COL12A1,COL3A1,COL6A3,GAS6,HIF1A,IL1B,IL6,INSIG2,LBP,PDGFRB,PLAT,PTGS2,SAA1,SERPINE1,SLC16A10,TGFBR2,THBS1,VEGFA | 197 (22)            |
| IL27               | cytokine                          | Activated                  | 2.343              | 8.7E-08            | CCL2,CCL20,CCL7,CXCL8,ICAM1,IL1B,IL1RN,IL6,IRF1,PRDM1,SOCS1                                                                  | 150 (16)            |
| MAP3K14            | kinase                            | Activated                  | 2.789              | 1E-07              | BIRC3,CD44,CXCL8,IL26,IL6,IL7R,NFKBIA,PTGS2,TNFAIP6                                                                          | 110 (16)            |
| mir-223            | microna                           | np                         | 0.832              | 1.1E-07            | ACTA2,C15orf48,C5AR1,IL1RN,MMP13,MYO1D,MYOF,NDRG2,NFIA,S100A9,SLC11A2,SLC29A1,SLC40A1                                        |                     |
| PTH                | other                             | np                         | 0.978              | 1.1E-07            | ANGPT1,CXCL2,IL11,IL6,MMP1,MMP13,RGS2,SFRP4,TMEM119,WISP2                                                                    | 156 (21)            |
| PTEN               | phosphatase                       | np                         | -1.103             | 1.2E-07            | ACSL1,ANGPT1,CA12,CEBPB,CXCL2,CXCL8,F3,G0S2,HIF1A,IL1B,IL6,ME,NKX3-1,NOS2,PDGFRB,PTGS2,STEAP1,VEGFA                          | 181 (19)            |
| PADI2              | enzyme                            | Activated                  | 2.219              | 1.3E-07            | CXCL2,CXCL6,CXCL8,IL6,PTGS2,TNFRSF1B                                                                                         | 74 (7)              |
| IL1                | group                             | Activated                  | 2.605              | 1.4E-07            | CCL2,CXCL8,IL6,MMP1,MMP10,MMP13,PTGS2                                                                                        | 163 (19)            |
| TXN                | enzyme                            | np                         | 1.382              | 1.4E-07            | CD38,HIF1A,ICAM1,IL1B,NFKBIA,NOS2,VEGFA                                                                                      | 106 (17)            |
| F2RL1              | g-protein coupled receptor        | np                         | 1.239              | 1.4E-07            | ACTA2,CTGF,CXCL8,IL1B,IL6,LIF,NOS2                                                                                           | 115 (17)            |
| IL32               | cytokine                          | np                         | 1.629              | 1.4E-07            | CXCL1,CXCL8,ICAM1,IL1B,IL6,MMP13,NOS2,PTGS2                                                                                  | 123 (16)            |
| BMP7               | growth factor                     |                            | -1.816             | 1.5E-07            | ACTA2,CCL2,CD44,CIDEA,CXCL8,DLX5,IL1B,IL6,MMP13                                                                              | 152 (16)            |
| NFKBIA             | transcription regulator           | Activated                  | 2.213              | 1.6E-07            | CXCL2,CXCL8,ICAM1,IL1B,IL6,LIF,NOS2,PTGS2,S100A9,VEGFA                                                                       | 169 (18)            |
| TCR                | complex                           | Activated                  | 2.079              | 1.7E-07            | ADORA2A,BCL3,BIRC3,CD38,CD44,CXCL8,HIF1A,ID3,IFIT1,IL7R,MAP3K8,NFKBIA,NRP1,PRDM1,SOCS1,STAT4,TNFAIP3                         | 142 (18)            |
| CD14               | transmembrane receptor            | Activated                  | 2.199              | 1.8E-07            | CCL2,CXCL2,ICAM1,IFIT1,IL1B,IL6,PTGS2,SOCS1                                                                                  | 94 (12)             |
| ZFP36              | transcription regulator           | np                         |                    | 1.8E-07            | CXCL2,ICAM1,IER3,IL1B,PRDM1,PTGS2,S100A9,SOCS1                                                                               | 137 (14)            |
| TANK               | other                             | Activated                  | 2.018              | 1.9E-07            | CXCL2,CXCL8,IL6,NFKBIZ,PTGS2,RGCC,ZC3H12A                                                                                    | 140 (17)            |
| PGR                | ligand-dependent                  | np                         | 1.281              | 2E-07              | ACSL1,AKR1C3,BIRC3,CCL8,CD44,CEBPB,F3,GAS6,GPER1,HIF1A,ICAM1,IER3,NET1,NFKBIA,PTGS2                                          | 142 (17)            |
| TCF7L2             | transcription regulator           | np                         | 0.531              | 2.1E-07            | ACSL1,ALDH1A2,ALDH3A2,AQP9,BMP4,CPD,CTGF,EVI2A,FBXO32,FTH1,GSN,ID3,IDH1,MMP1,PIGA,PLAT,PRICKLE1,SDC2,STK17B,VEGFA,WISP2      | 38 (3)              |
| XDH                | enzyme                            | np                         | 0.186              | 2.1E-07            | ACTA2,CEBPB,CTGF,HIF1A,IL1B,SERPINE1                                                                                         |                     |
| mir-146            | microna                           | Inhibited                  | -2.412             | 2.1E-07            | CCL2,CCL7,CXCL8,IL1B,IL6,SOCS1                                                                                               | 123 (11)            |
| CCL5               | cytokine                          | Activated                  | 2.934              | 2.1E-07            | C5AR1,CCL2,CD44,CXCL2,CXCL8,IL1B,IL6,NAMPT,PLAUR                                                                             | 124 (16)            |

| Upstream Regulator                 | Molecule Type           | Predicted Activation State | Activation z-score | p-value of overlap | Target Molecules                                                                                                                      | Mechanistic Network |
|------------------------------------|-------------------------|----------------------------|--------------------|--------------------|---------------------------------------------------------------------------------------------------------------------------------------|---------------------|
| APC                                | enzyme                  | np                         |                    | 2.2E-07            | CD44,CXCL2,HIF1A,HK2,ID3,IL6,MMP10,NOS2,PKD4,PTGS2,VEGFA                                                                              | 121 (12)            |
| IKBKE                              | kinase                  | np                         | 1.91               | 2.3E-07            | BIRC3,CXCL8,IFIT1,IL6,MMP13,NFKBIA,NOS2,PTGS2                                                                                         | 148 (16)            |
| WISP2                              | growth factor           | np                         | 0.152              | 2.3E-07            | CD44,CTGF,HIF1A,LAMB3,SERPINE1,TGFBR2,TGFBR3,TWIST1                                                                                   |                     |
| SMAD7                              | transcription regulator | np                         | -1.008             | 2.3E-07            | ACTA2,CITED2,CTGF,ICAM1,ID3,IL1B,NFKBIA,TAGLN                                                                                         | 143 (14)            |
| IL12B                              | cytokine                | np                         | 1.726              | 2.6E-07            | CXCL8,ICAM1,IL1B,IL6,MAP3K8,NOS2,S100A9,SOCS1,STAT4                                                                                   | 149 (18)            |
| ABCB4                              | transporter             | np                         | -0.346             | 2.6E-07            | ACTA2,CCL20,CTGF,ELF3,MMP13,PDGFRB,SERPINE1                                                                                           |                     |
| miR-155-5p (miRNAs w/seed UAAUGCU) | mature microRNA         | Inhibited                  | -2.754             | 2.9E-07            | CCL20,CXCL1,CXCL2,CXCL8,IL1B,IL6,SERPINE1,SOCS1                                                                                       |                     |
| MGEA5                              | enzyme                  | np                         | 0                  | 2.9E-07            | ACSL4,AHNAK2,ASS1,CCL2,CCL20,CD44,CEBPB,CH25H,CXCL6,CXCL8,FSCN1,GAS6,GPER1,GSN,PLA2G16,PLCE1,SOCS1,TGFBR2,TGFBR3,THBS1,TPD52L1,TUBA1A | 90 (7)              |
| TIRAP                              | other                   | Activated                  | 2.204              | 3.2E-07            | CXCL2,CXCL6,CXCL8,ICAM1,IL6,PTGS2                                                                                                     | 154 (17)            |
| TNFRSF18                           | transmembrane receptor  | np                         | -0.485             | 3.2E-07            | CCL2,CXCL8,ICAM1,IL6,NOS2,PTGS2                                                                                                       | 163 (19)            |
| SAMSN1                             | other                   | Activated                  | 2.111              | 3.2E-07            | CITED2,CXCL2,IL6,IRF1,NFKBIZ,PLAT,PTGS2,RGCC,SLCO3A1,SOCS1,ZC3H12A                                                                    |                     |
| INSR                               | kinase                  | np                         | 0                  | 3.5E-07            | ACSL1,ACSL4,ATF3,CCL2,COL6A3,CTGF,FHL1,GCH1,IDH1,IER3,IL11,IL6,                                                                       | 142 (17)            |
| LTBR                               | transmembrane receptor  | np                         | 1.151              | 3.5E-07            | ACTA2,CCL20,GPM6B,ICAM1,IL6,NOS2,PDGFRB,SERPINA1                                                                                      | 88 (11)             |
| IgG                                | complex                 | np                         | -0.166             | 3.6E-07            | CCL2,CD9,CEBPB,COL3A1,HSPB1,IL1B,IL1RN,IL6,PLAUR,PTGS2,SERPINB7,SERPINE1,TNFAIP3,VEGFA                                                | 145 (23)            |
| mir-515                            | microRNA                | np                         | -1.104             | 4.1E-07            | CXCL8,HIF1A,IL6,SERPINE1,TGFBR2                                                                                                       | 72 (6)              |
| CAMP                               | other                   | Activated                  | 2.168              | 4.3E-07            | CCL2,CCL20,CCL7,CXCL1,CXCL8,IL1B,IL1RN,IL6,NOS2                                                                                       | 114 (16)            |
| HMGB1                              | transcription regulator | np                         | 1.951              | 4.6E-07            | CCL2,CXCL8,HIF1A,ICAM1,IFIT1,IL6,PTGS2                                                                                                | 154 (20)            |
| IL17RA                             | transmembrane receptor  | np                         | 1.529              | 4.6E-07            | CCL20,CXCL2,CXCL6,IL1B,IL6,MMP13,S100A9                                                                                               | 120 (16)            |
| ASXL1                              | transcription regulator | np                         | -1.89              | 4.6E-07            | G0S2,HK2,HSD11B1,HYAL1,RARB,SERPINE1,VEGFA                                                                                            |                     |
| KLK5                               | peptidase               | Activated                  | 2.449              | 4.7E-07            | CCL20,CXCL2,ICAM1,IL1B,IL6,S100A9                                                                                                     |                     |
| IL36A                              | cytokine                |                            | 1.987              | 4.7E-07            | CCL20,CXCL1,CXCL6,CXCL8,IL1B,IL6                                                                                                      | 144 (14)            |
| JUNB                               | transcription regulator | Activated                  | 2.566              | 5E-07              | ATF3,COL7A1,CXCL2,FTH1,IL6,MMP1,MMP10,MMP13,PLAUR,SERPINE1                                                                            | 18 (3)              |

| Upstream Regulator | Molecule Type              | Predicted Activation State | Activation z-score | p-value of overlap | Target Molecules                                                                                | Mechanistic Network |
|--------------------|----------------------------|----------------------------|--------------------|--------------------|-------------------------------------------------------------------------------------------------|---------------------|
| ITGB1              | transmembrane receptor     | np                         | 1.744              | 5E-07              | ACTA2,CCL2,CXCL8,IL1B,NOS2,PLAUR,PTGS2,THBS1,VEGFA                                              | 165 (19)            |
| MMP9               | peptidase                  | np                         | 0.343              | 5.3E-07            | CD44,CXCL2,CXCL6,ICAM1,IL6,MMP13,SERPINA1,VEGFA                                                 | 146 (18)            |
| CD44               | enzyme                     |                            | 1.652              | 6E-07              | BIRC3,CD44,CIDEA,COL3A1,CXCL6,IL1B,IL1RN,IL6,IRAK3,MMP13,SERPINA1,STEAP1,THBS1,THY1,TWIST1      | 145 (21)            |
| ATF4               | transcription regulator    | Activated                  | 2.776              | 6.2E-07            | ATF3,CEBPB,DDIT4,FYN,GCH1,PMP22,PRRX2,PTGS2,PTX3,SLC6A9,SLC7A5,VEGFA                            |                     |
| IL11               | cytokine                   | Inhibited                  | -2.425             | 6.8E-07            | ACAN,CXCL8,IL1B,IL6,MMP1,MMP13                                                                  | 42 (3)              |
| IRF1               | transcription regulator    | np                         | 1.156              | 7.3E-07            | CCL2,CCL20,CXCL2,CXCL8,IL1B,IL6,NOS2,PLA2G16,PTGS2,RARRES3,SOCS1                                | 82 (10)             |
| IRAK2              | kinase                     | Activated                  | 2.2                | 7.3E-07            | CXCL2,CXCL8,IL1B,IL6,NOS2                                                                       | 145 (15)            |
| mir-373            | microna                    | np                         | -0.819             | 7.3E-07            | CD44,CXCL8,IL6,SERPINE1,TGFBR2                                                                  |                     |
| LY6E               | other                      | Inhibited                  | -2.213             | 7.3E-07            | CXCL8,IL1B,IL6,IRAK2,NFKBIA                                                                     | 79 (9)              |
| LBP                | transporter                | np                         |                    | 7.3E-07            | IFIT1,IL1B,IL1RN,IL6,LBP                                                                        | 49 (4)              |
| IL5                | cytokine                   | np                         | 0.796              | 7.4E-07            | AK3,ASS1,CCL2,CITED2,CRIP1,IER3,NOS2,PMP22,PRDM1,S100A4,SLC39A8,SLC7A5,SOCS1,THY1,TUBB2B        |                     |
| E2F3               | transcription regulator    | np                         | -0.389             | 7.6E-07            | AKR1C3,CA12,CCL20,CD9,CXCL1,ELF3,FGF2,KIAA0101,MT1B,MT1H,SERPINE1,THBS1                         |                     |
| PRL                | cytokine                   | np                         | -0.557             | 7.8E-07            | AKR1C3,CNN3,COL3A1,CPD,ID3,IFIT1,IL6,IRF1,MINOS1-NBL1/NBL1,MME,NOS2,PARM1,PK4,PRLR,SOCS1,SPINK1 | 119 (14)            |
| S100A8             | other                      | np                         | 0.75               | 8.2E-07            | ATF3,BCL3,CCL2,CCL20,CXCL2,CXCL8,DDIT4,ICAM1,IL1B,IL6,KCNMA1,NFKBIA,NOS2,WISP2                  | 137 (13)            |
| SYVN1              | transporter                | np                         | 1.387              | 9E-07              | ABCC3,ABCC4,CD44,CSPG4,DIO2,F3,HSPB1,IL7R,IRAK2,MYOF,SLC43A3,SLC7A2,SLC7A5                      |                     |
| PTGER4             | g-protein coupled receptor | np                         | -1.052             | 9E-07              | CCL2,CCL20,CH25H,CITED2,CXCL8,IL1B,IL6,IRF1,MAFF,MMP13,NOS2,PTGS2,SHISA3                        | 148 (19)            |
| KIAA1524           | other                      | np                         | -1.807             | 9.3E-07            | CFB,CRYAB,IER3,PDGFRB,PK4,PLAUR,SAT1,SCIN,SLC22A4                                               |                     |
| FBN1               | other                      | np                         | 0.115              | 9.6E-07            | COL3A1,COL6A3,CTGF,MMP1,SERPINE1,TGFBR2                                                         | 145 (13)            |
| CD40               | transmembrane receptor     | Activated                  | 2.206              | 9.8E-07            | BIRC3,CCL2,CD44,CXCL8,ICAM1,IL1B,IL1RN,IL6,IRF1,NFKBIA,NOS2,PRDM1,VEGFA                         | 112 (17)            |
| PI3K (family)      | group                      | Activated                  | 2.251              | 1.1E-06            | BIRC3,CCL2,CXCL8,FBXO32,HIF1A,IL6,NOS2,PTGS2,SERPINE1,VEGFA                                     | 148 (18)            |
| VDR                | transcription regulator    | np                         | 0.554              | 1.1E-06            | ABCC3,CXCL8,F3,ICAM1,IL1RN,IL6,NGF,PTGS2,SOCS1,STAT4                                            | 126 (17)            |
| GFI1               | transcription regulator    | Inhibited                  | -2.813             | 1.1E-06            | BCL3,CXCL8,ICAM1,IL1B,IL6,IL7R,IRAK2,IRF1,NFKBIA,SERPINA1                                       | 131 (12)            |

| Upstream Regulator                          | Molecule Type           | Predicted Activation State | Activation z-score | p-value of overlap | Target Molecules                                                               | Mechanistic Network |
|---------------------------------------------|-------------------------|----------------------------|--------------------|--------------------|--------------------------------------------------------------------------------|---------------------|
| INHA                                        | growth factor           | np                         | -0.552             | 1.1E-06            | ACTA2,ADAMTSL2,COL3A1,CTGF,CYP26B1,KITLG,PRLR,PRSS23,PTGS2, PTX3,SFRP4         | 47 (4)              |
| PLA2G4A                                     | enzyme                  | Activated                  | 2.173              | 1.2E-06            | CXCL8,IL1B,IL6,NOS2,PTGS2                                                      | 66 (7)              |
| miR-31-5p (and other miRNAs w/seed GGCAAGA) | mature microrna         | np                         | -1.643             | 1.2E-06            | BAMBI,CXCL1,CXCL5,CXCL8,IL1B                                                   |                     |
| NAMPT                                       | cytokine                | Activated                  | 2.39               | 1.3E-06            | CCL20,CXCL2,CXCL8,IL6,MMP1,NAMPT                                               | 105 (12)            |
| CHI3L1                                      | enzyme                  | np                         |                    | 1.3E-06            | NAMPT,SERPINE1,SLC39A14,TGFBR2,TMEM158,VEGFA                                   |                     |
| TNFRSF1B                                    | transmembrane receptor  | np                         | 1.865              | 1.4E-06            | ABCC3,ICAM1,LBP,MMP13,NOS2,SAA1,SERPINE1,TYMP                                  | 168 (18)            |
| RELB                                        | transcription regulator | np                         | 0.771              | 1.4E-06            | BIRC3,CCL20,IL1B,IL6,NFKBIA,NOS2,PTGS2,STAT4                                   | 92 (10)             |
| CDKN2A                                      | transcription regulator | np                         | 1.356              | 1.4E-06            | CCL2,CEBPB,CXCL6,EBF1,IL11,IL1B,IL6,MMP1,PDGFRB,PTGS2,SERPI NE1,TNFRSF1B,VEGFA | 176 (21)            |
| TSC22D1                                     | transcription regulator | Activated                  | 2                  | 1.4E-06            | CXCL8,IL1B,IL6,SERPINE1                                                        | 83 (5)              |
| TPSAB1/TP SB2                               | peptidase               | np                         | 1.98               | 1.4E-06            | CXCL2,IL1B,IL6,MMP13                                                           |                     |
| IL18RAP                                     | transmembrane receptor  | np                         |                    | 1.4E-06            | CXCL8,IL32,IL6,PTGS2                                                           | 87 (7)              |
| NR1H3                                       | ligand-dependent        | Inhibited                  | -2.108             | 1.5E-06            | CIDEA,DIO2,HSD11B1,IL1B,IL1RN,IL6,NFKBIA,NOS2,PTGS2,SLC16A10                   | 124 (13)            |
| TCF                                         | group                   | np                         |                    | 1.5E-06            | ALDH3A2,BMP4,CD44,DIO2,ID3,MME,SAA1,SEMA3C,SERPINA1,SERPI NE1                  | 89 (7)              |
| HNRNPA2B 1                                  | other                   | np                         |                    | 1.6E-06            | CA12,CRIP1,DNER,FHL1,FSCN1,GSN,HYAL1,IL6,PDE1A,PLOD2,SERPI NA1, SRPX,TWIST1    |                     |
| BMP2                                        | growth factor           | np                         | -0.538             | 1.7E-06            | ACTA2,BTG3,DLX5,GREM1,MMP13,TAGLN,TGM2,TMEM119,VEGFA                           | 117 (13)            |
| HDAC3                                       | transcription regulator | np                         |                    | 1.7E-06            | BIRC3,CD82,CXCL2,CXCL8,ICAM1,IL6,NFKBIA,PTGS2,RARB                             | 109 (12)            |
| N-cor                                       | group                   | np                         |                    | 1.7E-06            | ACSL1,CXCL2,DHRS3,IDH1,MMP13,PID1,PTGS2,RARB,RGL1,SOCS1                        | 100 (7)             |
| CDK9                                        | kinase                  | np                         | 1.741              | 1.8E-06            | CXCL2,CXCL8,IL6,NFKBIA,PKD4,TNFAIP3                                            | 16 (2)              |
| IL12 (complex)                              | complex                 | np                         | 1.002              | 1.9E-06            | CCL2,CCL20,CD44,CXCL6,IL6,IRF1,NOS2,PRDM1,RRAD,STAT4,TGFBR 2                   | 136 (18)            |

| Upstream Regulator | Molecule Type              | Predicted Activation State | Activation z-score | p-value of overlap | Target Molecules                                                                                                        | Mechanistic Network |
|--------------------|----------------------------|----------------------------|--------------------|--------------------|-------------------------------------------------------------------------------------------------------------------------|---------------------|
| SP3                | transcription regulator    | np                         |                    | 1.9E-06            | ACSL1,ACTA2,ATF3,CCL20,CITED2,COL7A1,GHR,PLAUR,PRLR,PTGS2,SLC39A8,TGFBR2,VEGFA                                          | 148 (11)            |
| LCN2               | transporter                | Activated                  | 2.221              | 1.9E-06            | CCL20,CXCL2,CXCL6,HIF1A,IL1B,IL1RN,IL6,NOS2                                                                             | 87 (10)             |
| IFNGR1             | transmembrane receptor     | np                         | 1.067              | 1.9E-06            | CCL20,CXCL6,ICAM1,IL1B,IL6,IRF1,PDGFRB                                                                                  | 143 (14)            |
| NR1H2              | ligand-dependent           | np                         | -1.96              | 1.9E-06            | CIDEA,DIO2,HSD11B1,IL1B,IL1RN,IL6,NFKBIA,NOS2,PTGS2,SLC16A10                                                            | 119 (16)            |
| Histone h3         | group                      | np                         |                    | 2E-06              | BMP4,BTG3,CCL2,CD9,CSPG4,CXCL8,GHR,ICAM1,IL1B,IL6,MEIS1,MTUS1,NFKBIA,NOS2,PRDM1,PRLR,PTGS2,RARB,TAGLN,TNFAIP3,VEGFA,WLS | 170 (16)            |
| Lymphotoxin        | complex                    | Activated                  | 2.219              | 2E-06              | CCL2,ICAM1,IL1B,IL6,MMP1                                                                                                |                     |
| PTAFR              | g-protein coupled receptor | np                         | 0.747              | 2E-06              | CXCL2,CXCL8,IL1B,IL6,PTGS2                                                                                              | 106 (11)            |
| ELF3               | transcription regulator    | np                         | 0.371              | 2E-06              | CCL20,ELF3,IL6,MMP13,TGFBR2                                                                                             | 95 (10)             |
| Lh                 | complex                    | Activated                  | 3.063              | 2E-06              | ACTA2,DHRS3,HK2,HSD11B1,IL6,MT3,PLAT,PLPP1,PTGS2,PTX3,RGS16,THBS1,TNFAIP3,TPM2,TUBA1A,VEGFA                             | 123 (9)             |
| TGM2               | enzyme                     | np                         | 1.777              | 2.3E-06            | AQP9,BIRC3,C5AR1,CCL2,CXCL8,FCER1G,HIF1A,IFIT1,IL1B,IL6,MT2A,PDGFRB,RARRES3,SLC7A2,THBS1,TNIP1                          | 121 (12)            |
| Akt                | group                      | np                         | 1.091              | 2.3E-06            | CD44,CEBPB,CIDEA,COL3A1,CXCL8,HIF1A,IL6,IL7R,PTGS2,SERPINE1,THBS1                                                       | 160 (19)            |
| SPHK1              | kinase                     | np                         | 1.6                | 2.4E-06            | BIRC3,CTGF,CXCL8,IL6,PTGS2,SERPINE1                                                                                     | 171 (22)            |
| WNT3A              | cytokine                   | np                         | -0.2               | 2.5E-06            | ACTA2,CEBPB,CTGF,DDIT4,IL6,NOS2,PRICKLE1,RHOU,SLC7A2,THBS1,TMEM158,VEGFA                                                | 112 (12)            |
| CD38               | enzyme                     | np                         | 0.139              | 2.6E-06            | AK3,ASS1,CITED2,CRIP1,ICAM1,IL6,PRDM1,S100A4,SLC39A8,SLC7A5,SOCS1,THY1,TUBB2B                                           |                     |
| PF4                | cytokine                   | Activated                  | 2.213              | 3E-06              | ACTA2,CCL2,CXCL8,IL1B,IL6                                                                                               | 161 (18)            |
| NT5E               | phosphatase                |                            | -1.387             | 3E-06              | COL3A1,IL1B,IL6,MMP13,SERPINE1                                                                                          | 63 (6)              |
| ZC3H12A            | enzyme                     | Inhibited                  | -2.201             | 3E-06              | CCL2,IL1B,IL6,NOS2,TNFRSF1B                                                                                             | 155 (17)            |
| TLR5               | transmembrane receptor     | Activated                  | 2.419              | 3.1E-06            | ATF3,CCL20,CXCL2,CXCL8,ICAM1,IL6                                                                                        | 132 (17)            |
| ICAM1              | transmembrane receptor     | np                         | 1.452              | 3.1E-06            | ACTA2,CXCL2,ICAM1,IL1B,IL6,VEGFA                                                                                        | 147 (18)            |
| Nr1h               | group                      | np                         | -1.468             | 3.2E-06            | ALDH1A2,BCL3,CXCL1,CXCL8,IL1B,IL6,INSIG2,NFKBIZ,NOS2,PTGS2,THBS1,THY1                                                   | 44 (4)              |
| BMP6               | growth factor              | np                         | 1.331              | 3.2E-06            | ACTA2,CD44,CTGF,DLX5,ID3,PMP22,PTGS2,TAGLN,VEGFA                                                                        | 91 (7)              |
| HS6ST1             | enzyme                     | np                         | 1.999              | 3.3E-06            | CXCL8,FGF2,IL6,VEGFA                                                                                                    | 87 (7)              |



| Upstream Regulator | Molecule Type              | Predicted Activation State | Activation z-score | p-value of overlap | Target Molecules                                                                              | Mechanistic Network |
|--------------------|----------------------------|----------------------------|--------------------|--------------------|-----------------------------------------------------------------------------------------------|---------------------|
| SLC16A3            | transporter                | np                         | 1.944              | 3.3E-06            | HK2,IL1B,IL6,NOS2                                                                             |                     |
| TXNIP              | other                      | np                         | 1.891              | 3.5E-06            | DDIT4,G0S2,ICAM1,IL1B,IL6,PTGS2,VEGFA                                                         | 128 (16)            |
| ELK1               | transcription regulator    | np                         | 0.928              | 3.5E-06            | BMP2,INSIG2,MMP13,SLC7A11,TAGLN,THBS1,TPD52L1                                                 |                     |
| TP63               | transcription regulator    | Activated                  | 2.634              | 3.6E-06            | CD82,CITED2,CXCL8,DDIT4,F3,HK2,ID3,IER3,IL1B,IL6,MMP13,PI3,PTPN12,S100A4,TAGLN,THBS1,THY1     | 170 (16)            |
| SOCS1              | other                      | np                         | -0.638             | 3.7E-06            | CD44,CXCL2,IFIT1,IL1B,IL6,IRF1,JAK2,NOS2,PTGS2,SOCS1                                          | 136 (17)            |
| MARK2              | kinase                     | np                         | 1.633              | 4.1E-06            | CD44,CXCL2,IRF1,NFKBIZ,PTGS2,SLCO3A1                                                          |                     |
| LGALS1             | other                      | np                         | -0.522             | 4.2E-06            | ACTA2,ANG,CXCL2,F3,IL6,PTX3,SERPINE1                                                          | 111 (10)            |
| BIRC3              | enzyme                     | Activated                  | 2.159              | 4.5E-06            | CCL2,CXCL1,CXCL8,IL1B,IL6                                                                     | 100 (15)            |
| XIAP               | enzyme                     | np                         | 1.982              | 4.5E-06            | CXCL1,CXCL8,IL6,PTGS2,SERPINE1                                                                | 141 (21)            |
| PSMD10             | transcription regulator    | np                         | 1.342              | 4.5E-06            | ANGPT1,CXCL1,CXCL8,ICAM1,PLD1                                                                 |                     |
| IRAK3              | kinase                     | np                         | 0.512              | 4.5E-06            | CXCL2,IL6,NFKBIA,SOCS1,TNFAIP3                                                                | 91 (9)              |
| CD28               | transmembrane receptor     | np                         | -1.448             | 4.7E-06            | CXCL2,CXCL8,FYN,IL6,IL7R,IRF1,NFKBIA,PRDM1,PTGS2,SLC7A5,TNFAIP3,TNFRSF1B                      | 135 (15)            |
| IL7                | cytokine                   | np                         | 0.031              | 5E-06              | CTSK,EBF1,IL24,IL6,IL7R,MMP13,SOCS1                                                           |                     |
| MAP3K8             | kinase                     | np                         | 1.471              | 5.1E-06            | CCL20,COLEC12,CXCL2,CXCL8,FSCN1,IER3,IL1B,IL6,PLAT,PTGS2,STK17B,TUBB2B                        | 141 (16)            |
| ASXL2              | other                      | np                         | 1.633              | 5.2E-06            | G0S2,HK2,HSD11B1,HYAL1,SERPINE1,VEGFA                                                         | 101 (7)             |
| CXCR4              | g-protein coupled receptor | np                         | 1.165              | 5.2E-06            | CCL2,CXCL8,DLX5,F3,IL6,MMP13                                                                  | 163 (20)            |
| ATF1               | transcription regulator    | np                         |                    | 5.2E-06            | CEBPB,FTH1,NOS2,PTGS2,TGFBR2,THBS1                                                            | 36 (4)              |
| FOXO1              | transcription regulator    | np                         | 0.403              | 5.4E-06            | AFF3,AQP9,CCL20,CD79B,CTGF,CTSK,CXCL8,EBF1,EFHD1,FBXO32,IER3,IL6,IL7R,MMP1,NAMPT,NKX3-1,PRDM1 | 118 (9)             |
| HSPB3              | other                      | np                         |                    | 5.6E-06            | CCL2,CXCL8,ICAM1                                                                              |                     |
| HSPB6              | other                      | np                         |                    | 5.6E-06            | CCL2,CXCL8,ICAM1                                                                              | 87 (7)              |
| mir-155            | microna                    | np                         | -1.391             | 6E-06              | CEBPB,HK2,IL1B,IL6,NOS2,SERPINE1,SOCS1                                                        | 144 (19)            |
| PLG                | peptidase                  | Activated                  | 2.048              | 6.3E-06            | CCL2,COLEC12,F3,FYN,IL1B,IL6,PTGS2,SERPINE1                                                   | 167 (20)            |
| RIPK1              | kinase                     | Activated                  | 2.186              | 6.4E-06            | CCL2,CXCL1,CXCL2,CXCL8,IL6                                                                    | 148 (16)            |
| BIRC2              | enzyme                     | np                         | 0.831              | 6.4E-06            | BIRC3,CCL2,CXCL1,CXCL8,IL6                                                                    | 135 (17)            |
| MSR1               | transmembrane receptor     | np                         | -0.832             | 6.4E-06            | CXCL2,IFIT1,IL1B,IL6,NOS2                                                                     | 103 (16)            |
| Growth hormone     | group                      | np                         | 0.666              | 6.5E-06            | BMP4,CEBPB,CITED2,IER3,NFKBIA,PK4,SOCS1,TGFBR2,ZEB2                                           | 31 (3)              |
| NLRC4              | other                      | Activated                  | 2                  | 6.5E-06            | CXCL2,CXCL6,IL1B,NOS2                                                                         | 148 (16)            |

| Upstream Regulator | Molecule Type           | Predicted Activation State | Activation z-score | p-value of overlap | Target Molecules                                                                                                     | Mechanistic Network |
|--------------------|-------------------------|----------------------------|--------------------|--------------------|----------------------------------------------------------------------------------------------------------------------|---------------------|
| PSMB10             | peptidase               | np                         | 1                  | 6.5E-06            | IL6,NFKBIA,NOS2,TNFAIP3                                                                                              | 78 (7)              |
| PSMB8              | peptidase               | np                         | 1                  | 6.5E-06            | IL6,NFKBIA,NOS2,TNFAIP3                                                                                              | 78 (7)              |
| PIAS4              | transcription regulator | np                         | -1.732             | 6.5E-06            | CXCL2,IL1B,IRF1,SERPINE1                                                                                             | 73 (7)              |
| CITED2             | transcription regulator | Inhibited                  | -2.216             | 6.6E-06            | CXCL1,CXCL8,HIF1A,IL6,MMP1,VEGFA                                                                                     |                     |
| CREB1              | transcription regulator | Activated                  | 2.384              | 6.9E-06            | ADORA2A,ATF3,CEBPB,CH25H,CXCL8,DIO2,IL6,MMP13,NOS2,PTGS2,RGS2,VEGFA                                                  | 139 (9)             |
| STK40              | kinase                  | np                         | -1.994             | 7.1E-06            | CCL2,CXCL1,CXCL5,CXCL8,IL1B,PTGS2,ST3GAL1                                                                            | 95 (10)             |
| MET                | kinase                  | Activated                  | 2.154              | 7.2E-06            | CD44,CITED2,HSPB1,IL6,NFKBIZ,PTGS2,SLCO3A1,TGIF1,VEGFA                                                               | 132 (19)            |
| LIPE               | enzyme                  | np                         |                    | 7.3E-06            | ACSL1,ANGPT1,ATF3,CDO1,CEBPB,CITED2,G0S2,KITLG,NET1,RARB,R                                                           |                     |
| SMAD3              | transcription regulator | np                         | -0.969             | 7.4E-06            | ACTA2,BMP2,CCL2,COL3A1,CTGF,IL1B,IL6,MMP1,MMP13,NET1,PTGS2,SERPINE1                                                  | 146 (20)            |
| PPIF               | enzyme                  | np                         | 1.265              | 7.4E-06            | CCL2,CCL20,CITED2,CXCL2,CXCL6,GDF5,IL6,LIF,PK4,PDZRN3                                                                | 86 (7)              |
| Map3k7             | kinase                  | np                         | 0.446              | 8.2E-06            | BMP4,IL1B,IL6,NFKBIZ,NGF,NOD2,PTGS2,S100A9                                                                           | 158 (19)            |
| AGT                | growth factor           | np                         | 1.692              | 8.4E-06            | CTGF,CXCL2,F3,FGF2,ICAM1,IL6,VEGFA                                                                                   | 138 (19)            |
| SAA                | group                   | Activated                  | 2.195              | 9E-06              | F3,ICAM1,IL1RN,MMP1,MMP13                                                                                            | 138 (14)            |
| P2RX7              | ion channel             | np                         | 1.949              | 9E-06              | CCL2,CCL20,IL1B,IL6,NOS2                                                                                             | 131 (17)            |
| BID                | other                   | np                         | 1.387              | 9E-06              | C5AR1,CTSK,CXCL8,IL1B,IL6                                                                                            | 67 (6)              |
| SCARB1             | transporter             | np                         | 0                  | 9E-06              | CCL2,DDIT4,FBXO32,IL1B,IL6                                                                                           | 165 (19)            |
| SOD1               | enzyme                  | np                         |                    | 9.7E-06            | ASS1,BMP4,CRYAB,FTH1,GSTM1,HSPB1,IL1B,IL6,SLC11A2,SLC40A1,STAT4,TGFBR2,TNFAIP3                                       | 115 (13)            |
| ARHGAP21           | other                   | np                         | 1.89               | 9.9E-06            | CITED2,CXCL2,IRF1,NFKBIZ,PLAT,PTGS2,SLCO3A1                                                                          |                     |
| Gsk3               | group                   | np                         | 1.309              | 9.9E-06            | CXCL8,ICAM1,IL1B,IL6,NOS2,TNFAIP3,TWIST1                                                                             | 112 (17)            |
| CSF1               | cytokine                | np                         | 1.412              | 0.00001            | CCL2,CTSK,CXCL6,GPR68,IL1B,IL6,TNFAIP3,TNFRSF1B,VEGFA                                                                | 118 (16)            |
| BSCL2              | other                   | np                         |                    | 1.1E-05            | ACSL1,AKR1C3,GREM1,IER3,IL6,MMP13,NOS2,PTGS2                                                                         |                     |
| STAT5A             | transcription regulator | np                         |                    | 1.2E-05            | AKR1C3,BIRC3,C15orf48,CEBPB,CXCL5,HIST2H2AA3/HIST2H2AA4,IL24,IL6,IL7R,LAMB3,PRDM1,PRSS23,RARRES3,SBSPON,SOCS1,TGFBR2 | 136 (12)            |
| BMX                | kinase                  | Activated                  | 2                  | 1.2E-05            | COL3A1,CXCL8,IL6,TNFRSF1B                                                                                            | 175 (24)            |
| HSPB8              | kinase                  | np                         | 1                  | 1.2E-05            | BMP4,CCL2,CXCL8,ICAM1                                                                                                | 88 (7)              |
| ATG16L1            | enzyme                  | np                         | -1.964             | 1.2E-05            | CXCL2,IL1B,IL6,NFKBIA                                                                                                | 118 (17)            |
| EPAS1              | transcription regulator | np                         | -0.236             | 1.2E-05            | CITED2,CTGF,CYBRD1,FHL1,SERPINE1,SLC11A2,SLC29A1,SLC40A1,SLC7A5,VEGFA,WISP2                                          |                     |
| FGF1               | growth factor           | np                         | 1.195              | 1.2E-05            | AKR1B1,CTGF,GSTM1,PRICKLE1,RHO,SLC7A2,TGM2,THBS1                                                                     |                     |
| SOCS6              | other                   | np                         | 1.342              | 1.2E-05            | CXCL2,IL1B,PLAT,PTGS2,RGCC                                                                                           |                     |
| PRKG1              | kinase                  | np                         | -1.387             | 1.2E-05            | ACTA2,COL3A1,CTGF,SERPINE1,TAGLN                                                                                     | 76 (7)              |
| PROC               | peptidase               | Inhibited                  | -2.207             | 1.2E-05            | CXCL2,IL1B,IL6,NOS2,SERPINE1                                                                                         | 137 (22)            |

| Upstream Regulator | Molecule Type           | Predicted Activation State | Activation z-score | p-value of overlap | Target Molecules                                                                 | Mechanistic Network |
|--------------------|-------------------------|----------------------------|--------------------|--------------------|----------------------------------------------------------------------------------|---------------------|
| BCL3               | transcription regulator | Inhibited                  | -2.207             | 1.3E-05            | CD82,CXCL8,ICAM1,IL1B,IRF1,PKD4                                                  | 80 (8)              |
| SPP1               | cytokine                | np                         | 1.225              | 1.3E-05            | ANGPT1,CCL2,CD44,IL1B,IL6,NDRG2,NOS2,PTGS2,TGFBR2,VAT1                           | 164 (19)            |
| PRKAA2             | kinase                  | np                         | 0.711              | 1.3E-05            | ACTA2,ARHGDIB,CIDEA,GALM,HIF1A,IL6,NDRG2,NFIB,NFKBIA,TGM2                        | 144 (14)            |
| MAPKAPK2           | kinase                  | np                         | 1.067              | 1.4E-05            | CITED2,CXCL8,HSPB1,ICAM1,IL6,NFKBIA,PLAT                                         | 84 (10)             |
| CD3                | complex                 | Inhibited                  | -2.435             | 1.5E-05            | BIRC3,CCL20,CD44,CXCL8,HIF1A,IL6,IRF1,NFKBIA,PTGS2,TGM2,THY1, TNFAIP3,VEGFA      | 116 (13)            |
| TRAF6              | enzyme                  | Activated                  | 2.362              | 1.5E-05            | CCL2,CXCL2,CXCL8,ICAM1,IL1B,IL6                                                  | 163 (18)            |
| ALDH1A2            | enzyme                  | np                         | -0.647             | 1.5E-05            | ATF3,CD44,COL3A1,CTGF,FGF2,RARB                                                  | 93 (7)              |
| FCGR2A             | transmembrane receptor  | Activated                  | 2.177              | 1.6E-05            | CCL2,CXCL2,IL1B,IL6,VEGFA                                                        | 94 (16)             |
| TGIF1              | transcription regulator | Activated                  | 2                  | 1.9E-05            | CXCL2,IL1B,IL6,RARB                                                              |                     |
| CYP2J2             | enzyme                  | np                         | -1                 | 1.9E-05            | CXCL6,IL1B,IL6,NFKBIA                                                            | 78 (8)              |
| HIF3A              | transcription regulator | np                         | -1.091             | 1.9E-05            | PDGFRB,PLAUR,RARB,VEGFA                                                          |                     |
| UCP2               | transporter             | np                         | -1.948             | 1.9E-05            | HK2,IL1B,IL6,NOS2                                                                | 118 (17)            |
| FCGR1A             | transmembrane receptor  | np                         |                    | 1.9E-05            | F3,IL1B,IL1RN,IL6                                                                | 126 (12)            |
| DICER1             | enzyme                  | Inhibited                  | -2.164             | 1.9E-05            | CD44,CXCL8,ICAM1,ID3,IL1B,MT2A,PMP22,RGCC,SERPINA1,SERPINE1, SFRP4,SLC40A1,THBS1 | 114 (16)            |
| C5                 | cytokine                | Activated                  | 2.409              | 2.1E-05            | CXCL2,CXCL8,F3,IL1B,IL6,MMP1,SERPINE1                                            | 174 (18)            |
| SOCS3              | phosphatase             | np                         | -1.743             | 2.1E-05            | ATF3,IFIT1,IL1B,IL6,IRF1,NOS2,SOCS1                                              | 124 (19)            |
| IL1RL2             | transmembrane receptor  | np                         |                    | 2.2E-05            | CCL20,CXCL1,CXCL8                                                                | 73 (7)              |
| PARG               | enzyme                  | np                         |                    | 2.2E-05            | IL1B,NOS2,PTGS2                                                                  | 64 (7)              |
| MUC2               | other                   | np                         |                    | 2.2E-05            | IL1B,IL6,PTGS2                                                                   |                     |
| A4GALT             | enzyme                  | np                         |                    | 2.2E-05            | IL6,IRF1,NOS2                                                                    |                     |
| PLA2G2A            | enzyme                  | np                         |                    | 2.2E-05            | CD44,CXCL8,IL6                                                                   |                     |
| PELI2              | other                   | np                         |                    | 2.2E-05            | CXCL2,CXCL8,IL6                                                                  | 148 (15)            |
| HS6ST2             | enzyme                  | np                         |                    | 2.2E-05            | CXCL8,FGF2,IL6                                                                   | 87 (7)              |
| PRKAA1             | kinase                  | np                         | 1.247              | 2.2E-05            | ACTA2,ARHGDIB,ATF3,GALM,IL6,NDRG2,NFIB,NFKBIA,TGM2                               | 154 (13)            |
| LPL                | enzyme                  | np                         | 1.607              | 2.2E-05            | CCL2,IL1B,IL6,PKD4,THBS1,VEGFA                                                   | 89 (9)              |
| ENG                | transmembrane receptor  | np                         | -0.06              | 2.2E-05            | ACTA2,CTGF,SERPINE1,TGFBR2,THBS1,TWIST1                                          | 115 (13)            |
| PRKCE              | kinase                  | Activated                  | 2.586              | 2.4E-05            | BIRC3,CEBPB,IL6,NOS2,PTGS2,RGS2,VEGFA                                            | 127 (17)            |
| PTPRJ              | phosphatase             | np                         | 1.89               | 2.4E-05            | CITED2,CXCL2,IL6,NFKBIZ,PLAT,PTGS2,ZC3H12A                                       | 133 (15)            |

| Upstream Regulator | Molecule Type           | Predicted Activation State | Activation z-score | p-value of overlap | Target Molecules                                                                                                                                  | Mechanistic Network |
|--------------------|-------------------------|----------------------------|--------------------|--------------------|---------------------------------------------------------------------------------------------------------------------------------------------------|---------------------|
| ATM                | kinase                  | np                         | 1.72               | 2.7E-05            | CTGF,CXCL8,IL6,SERPINE1,TGM2,TNFAIP3                                                                                                              | 161 (22)            |
| GAPDH              | enzyme                  | np                         | 1.698              | 2.7E-05            | CCL2,CCL20,CXCL1,ENPP1,FCER1G,RIPK3                                                                                                               |                     |
| TNFAIP3            | enzyme                  | np                         | -1.458             | 2.7E-05            | CXCL8,ICAM1,IL1B,IL6,NFKBIA,TNFAIP3                                                                                                               | 102 (14)            |
| FOXO3              | transcription regulator | np                         | -0.059             | 2.7E-05            | CTGF,CXCL8,FBXO32,IER3,IL6,MMP13,NAMPT,NFKBIA,SLC40A1                                                                                             | 164 (14)            |
| DOCK8              | other                   | Activated                  | 2.121              | 2.7E-05            | CITED2,IL6,IRF1,NFKBIZ,PLAT,PTGS2,SLCO3A1,SOCS1                                                                                                   |                     |
| SOX2               | transcription regulator | np                         | 0.785              | 2.7E-05            | AMOT,ANGPT1,ATF3,BMP4,CITED2,CTGF,DLX5,ELF3,HOPX,KITLG,MEIS1,NRP1,PCDH18,PRDM1,VEGFA,WLS                                                          | 22 (2)              |
| RNASE1             | enzyme                  | Activated                  | 2.213              | 2.8E-05            | CCL2,CCL7,CCL8,CXCL5,IL6                                                                                                                          |                     |
| IL36B              | cytokine                | np                         | 1.993              | 2.8E-05            | CCL20,CXCL1,CXCL8,IL1B,IL6                                                                                                                        | 144 (14)            |
| REN                | peptidase               | np                         | 1.458              | 2.8E-05            | CTGF,F3,FGF2,ICAM1,IL6                                                                                                                            | 106 (12)            |
| MIR17HG            | other                   | np                         | -0.277             | 2.8E-05            | ACTA2,FZD4,TAGLN,TGFBR2,TNFAIP3                                                                                                                   |                     |
| IGF1R              | transmembrane receptor  | np                         | 0.431              | 2.9E-05            | ABCC4,ACSL1,ACTA2,CD38,CEBPB,COL3A1,FTH1,GPER1,IL6,PLAT,PTGS2,S100A4,SCG2,TWIST1                                                                  | 171 (22)            |
| HDAC1              | transcription regulator | Activated                  | 2                  | 2.9E-05            | ACAN,CD44,CTSK,CXCL8,IL24,IL6,MME,NFKBIA,NKX3-1,PTGS2,S100A9,TGFBR2,TGM2                                                                          | 121 (15)            |
| AREG               | growth factor           | np                         | 1.951              | 2.9E-05            | CCL20,IL6,PTGS2,TNFAIP6                                                                                                                           | 98 (13)             |
| Tnf receptor       | group                   | np                         | -0.106             | 2.9E-05            | CCL20,CXCL8,IL6,SERPINE1                                                                                                                          | 96 (12)             |
| CST3               | other                   | np                         | -1.067             | 2.9E-05            | CTSK,FGF2,IL1B,NFKBIA                                                                                                                             |                     |
| BPIFA1             | other                   | np                         | -1.98              | 2.9E-05            | CCL20,CXCL2,IL1B,IL6                                                                                                                              |                     |
| NOD1               | other                   | np                         |                    | 2.9E-05            | CXCL2,CXCL8,IL1B,IL6                                                                                                                              | 141 (15)            |
| BCL10              | transcription regulator | np                         |                    | 2.9E-05            | CD44,CXCL2,CXCL8,IL6                                                                                                                              | 127 (16)            |
| TSC2               | other                   | np                         | 0.419              | 3E-05              | ATF3,CRIP1,CRYAB,GSN,HIF1A,HK2,HSPB1,PDGFRB,PKD4,TAGLN                                                                                            |                     |
| CTGF               | growth factor           | np                         | 1.132              | 3.4E-05            | ACAN,CD44,HIF1A,KITLG,MMP13,SERPINE1,SFRP4,VEGFA                                                                                                  | 78 (7)              |
| IL12 (family)      | group                   | Activated                  | 2.2                | 3.6E-05            | BCL3,CD44,IRF1,NFKBIZ,STAT4                                                                                                                       | 138 (15)            |
| ALB                | transporter             | np                         | 1.989              | 3.6E-05            | ACTA2,CXCL8,IL6,NOS2,VEGFA                                                                                                                        | 157 (16)            |
| SEMA7A             | transmembrane receptor  | np                         | -0.447             | 3.6E-05            | COL3A1,CTGF,FGF2,NOV,WISP2                                                                                                                        |                     |
| FASLG              | cytokine                | np                         |                    | 3.6E-05            | CCL2,CD44,IL1B,IL6,STAT4                                                                                                                          | 131 (18)            |
| NUPR1              | transcription regulator | Activated                  | 2.711              | 3.7E-05            | ATF3,CEBPB,CITED2,CNPY4,COL3A1,CXCL5,CXCL8,GCH1,HILPDA,HK2,LIF,MMP10,NFIB,PMP22,SAT1,SERPINE1,SIPA1L2,SLC16A10,SLC2A12,SLC39A8,TMEM158,TNIP1,UAP1 |                     |
| IRS1               | enzyme                  | np                         |                    | 3.7E-05            | CEBPB,CIDEA,COL3A1,COL6A3,COL7A1,FBXO32,FHL1,NRP1,RHOU,VEGFA                                                                                      | 112 (12)            |
| SASH1              | other                   | Activated                  | 2.121              | 3.7E-05            | CITED2,IL6,IRF1,NFKBIZ,PLAT,PTGS2,SLCO3A1,SOCS1                                                                                                   |                     |
| EIF2AK3            | kinase                  | Activated                  | 2.207              | 3.8E-05            | ANG,ATF3,BIRC3,CEBPB,DNAJB9,FGF2,GCH1,PRDM1,VEGFA                                                                                                 |                     |

| Upstream Regulator | Molecule Type                     | Predicted Activation State | Activation z-score | p-value of overlap | Target Molecules                                                                                                | Mechanistic Network |
|--------------------|-----------------------------------|----------------------------|--------------------|--------------------|-----------------------------------------------------------------------------------------------------------------|---------------------|
| MAP2K1/2           | group                             | np                         | 1.118              | 4.1E-05            | ATF3,CTGF,HK2,HSPB1,IL1B,NOS2,VEGFA                                                                             | 170 (19)            |
| PPARA              | ligand-dependent nuclear receptor | np                         | 0.106              | 4.1E-05            | ACSL1,ADTRP,ALDH3A2,AQP9,ASS1,CEBPB,CIDEA,G0S2,HIF1A,HILPD A, IL6,INSIG2,LAMB3,NFKBIA,NOS2,PKD4,SAA1,SAT1,VEGFA | 140 (12)            |
| NOS2               | enzyme                            | np                         | 1.382              | 4.2E-05            | CXCL2,HIF1A,IL1B,IL1RN,IL32,IL6,NFKBIA,NOS2,PTGS2,SLC40A1,THY1, VEGFA                                           | 131 (15)            |
| PPARGC1A           | transcription regulator           | np                         | -0.59              | 4.2E-05            | CEBPB,CIDEA,FBXO32,GAS6,HK2,IL6,INSIG2,PKD4,PTGS2,SLC39A14, SOCS1,VEGFA                                         | 172 (17)            |
| INSIG1             | other                             | Inhibited                  | -3                 | 4.2E-05            | ACSL4,CXCL2,CXCL6,IL6,NFKBIZ,PLD1,S100A9,STAT4,STEAP2                                                           |                     |
| ETS1               | transcription regulator           | np                         | 1.438              | 4.3E-05            | ARHGDIB,BMP4,CD44,CTGF,IL24,IL7R,MMP1,MMP13,PRDM1,SERPINE 1, ZEB2                                               |                     |
| LPAR1              | g-protein coupled receptor        | np                         | 0.927              | 4.4E-05            | CTGF,CXCL8,IL6,PTGS2                                                                                            | 103 (13)            |
| mir-145            | microna                           | np                         | -0.713             | 4.4E-05            | ACTA2,FSCN1,IL6,TAGLN                                                                                           |                     |
| FRS2               | kinase                            | np                         |                    | 4.4E-05            | ACTA2,BMP4,CD44,TAGLN                                                                                           |                     |
| C5AR1              | g-protein coupled receptor        | Activated                  | 2.415              | 4.4E-05            | C5AR1,CXCL2,FCER1G,IL1B,IL6,MMP1                                                                                | 80 (11)             |
| RC3H1              | enzyme                            | np                         |                    | 4.5E-05            | CCL20,CXCL2,CXCL6,IL1B,TNFRSF1B                                                                                 |                     |
| SCD                | enzyme                            | np                         | -1.915             | 4.6E-05            | ATF3,CEBPB,CXCL8,DIO2,IL1B,IL6,NOS2                                                                             | 120 (16)            |
| MED1               | transcription regulator           | np                         |                    | 0.00005            | BCL3,CD79B,CIDEA,EBF1,GHR,LIF,PRDM1,PRLR,RARB,THBS1                                                             |                     |
| IL12A              | cytokine                          | np                         | 0.398              | 5.2E-05            | FGF2,ICAM1,IL1B,IL6,SOCS1,STAT4                                                                                 | 141 (17)            |
| PTGER2             | g-protein coupled receptor        | np                         | 1.756              | 5.4E-05            | CXCL8,IL1B,IL6,NOS2,PTGS2,THBS1,TNFAIP6,TREM1,VEGFA                                                             | 116 (17)            |
| FLT4               | transmembrane receptor            | np                         |                    | 5.4E-05            | IL1B,IL6,SOCS1                                                                                                  |                     |
| PROK2              | other                             | np                         |                    | 5.4E-05            | HIF1A,IL1B,VEGFA                                                                                                | 82 (7)              |
| LUM                | other                             | np                         |                    | 5.4E-05            | CXCL2,IL1B,IL6                                                                                                  |                     |
| OTUD7B             | peptidase                         | np                         |                    | 5.4E-05            | ACTA2,CXCL8,ICAM1                                                                                               | 67 (7)              |
| LPAR2              | g-protein coupled receptor        | np                         |                    | 5.4E-05            | CXCL8,IL6,PTGS2                                                                                                 | 101 (11)            |
| SENP6              | peptidase                         | np                         |                    | 5.4E-05            | CXCL8,ICAM1,IL6                                                                                                 | 89 (9)              |
| PLAA               | other                             | np                         |                    | 5.4E-05            | IL32,IL6,PTGS2                                                                                                  | 79 (7)              |
| PILRA              | other                             | np                         |                    | 5.4E-05            | CXCL2,IL1B,IL6                                                                                                  |                     |
| S100A7             | other                             | np                         |                    | 5.4E-05            | CXCL1,CXCL8,IL11                                                                                                |                     |
| IL17F              | cytokine                          | np                         |                    | 5.4E-05            | CCL2,CXCL1,CXCL5                                                                                                | 88 (7)              |

| Upstream Regulator | Molecule Type              | Predicted Activation State | Activation z-score | p-value of overlap | Target Molecules                                      | Mechanistic Network |
|--------------------|----------------------------|----------------------------|--------------------|--------------------|-------------------------------------------------------|---------------------|
| TAF4B              | transcription regulator    | np                         |                    | 5.6E-05            | CTGF,IER3,MMP13,NFKBIA,TNFAIP3                        |                     |
| ATG7               | enzyme                     | np                         | -0.13              | 6E-05              | ACTA2,CXCL8,IL1B,IL6,NFKBIA,S100A4                    | 112 (16)            |
| SOX11              | transcription regulator    | np                         | -0.761             | 6.1E-05            | BMP2,BMP4,CD9,EBF1,FCMR,HILPDA,PRDM1,TUBA1A           |                     |
| CDKN1A             | kinase                     | np                         | -1.34              | 6.1E-05            | ACTA2,CCL2,CTSK,IL1B,IL6,KIAA0101,LIMA1,MMP1          | 139 (16)            |
| IL1RAP             | transmembrane receptor     | Activated                  | 2                  | 6.2E-05            | CCL20,CXCL1,CXCL8,IL6                                 | 73 (7)              |
| PDE5A              | enzyme                     | Activated                  | 2                  | 6.2E-05            | IL1B,IL6,NOS2,S100A9                                  |                     |
| IL-1R              | group                      | np                         | 1.974              | 6.2E-05            | COL3A1,CXCL2,IL1B,IL6                                 | 159 (18)            |
| BDKRB2             | g-protein coupled receptor | np                         | 1.96               | 6.2E-05            | CD44,CTGF,ICAM1,PTGS2                                 |                     |
| FCER1G             | transmembrane receptor     | np                         | 1.951              | 6.2E-05            | CXCL8,IL1B,IL1RN,IL6                                  | 172 (21)            |
| S1PR2              | g-protein coupled receptor | np                         | 0.991              | 6.2E-05            | ACTA2,F3,ICAM1,PTGS2                                  | 74 (7)              |
| BMP15              | growth factor              | np                         | 0.762              | 6.2E-05            | ID3,PTGS2,PTX3,TNFAIP6                                | 16 (3)              |
| Ras                | group                      | np                         |                    | 6.2E-05            | CXCL8,MMP13,PTGS2,VEGFA                               | 116 (15)            |
| CRYAB              | other                      | np                         |                    | 6.2E-05            | ACAN,BMP2,FBXO32,MME                                  |                     |
| TNFRSF12A          | transmembrane receptor     | np                         |                    | 6.2E-05            | CCL2,CXCL8,IL6,MMP1                                   | 73 (7)              |
| STAT4              | transcription regulator    | np                         | 1.709              | 6.6E-05            | BCL3,CXCL2,IL6,MAP3K8,PRDM1,RRAD,TWIST1               | 128 (13)            |
| TFAP2A             | transcription regulator    | np                         |                    | 6.6E-05            | BIRC3,COL7A1,CXCL1,CXCL2,PLA2G16,VEGFA,WISP2          |                     |
| Histone h4         | group                      | np                         |                    | 6.6E-05            | BTG3,CXCL8,IL1B,IL6,IRF1,PRLR,PTGS2,RARB,TAGLN,TGFBR2 | 146 (14)            |
| IRF4               | transcription regulator    | np                         | -0.406             | 6.7E-05            | CCL20,IL1B,IL1RN,IL6,IL7R,IRF1,JAK2,PRDM1             | 123 (17)            |
| TIMP1              | cytokine                   | np                         | 0.447              | 6.9E-05            | CD38,CD44,MME,PLAT,PLAUR                              |                     |
| ADAMTS12           | peptidase                  | np                         | -1.432             | 6.9E-05            | IL11,IL6,MMP13,S100A9,TAGLN                           |                     |
| NOTCH3             | transcription regulator    | np                         |                    | 6.9E-05            | ACTA2,NOS2,PDGFRB,PTX3,SMTN                           |                     |
| FOSL2              | transcription regulator    | np                         |                    | 6.9E-05            | CXCL8,DIO2,F3,MMP1,NOS2                               |                     |
| Gm-csf             | group                      | np                         | 1.953              | 0.00007            | BCL3,CXCL8,IL1B,IL6,MMP1,PTGS2                        | 161 (19)            |
| EIF3E              | other                      | np                         | 0.64               | 0.00007            | ANGPT1,CXCL1,FGF2,SAA1,THBS1,ZEB2                     |                     |
| PTK2               | kinase                     | np                         | -0.155             | 0.00007            | ACTA2,CSPG4,IL6,LPP,PDGFRB,THBS1                      | 44 (4)              |

| Upstream Regulator | Molecule Type              | Predicted Activation State | Activation z-score | p-value of overlap | Target Molecules                                                            | Mechanistic Network |
|--------------------|----------------------------|----------------------------|--------------------|--------------------|-----------------------------------------------------------------------------|---------------------|
| ATF3               | transcription regulator    | np                         | -1.959             | 0.00007            | ATF3,BIRC3,CD82,GSN,IL6,SERPINE1                                            | 139 (12)            |
| SRF                | transcription regulator    | np                         | -1.262             | 7.3E-05            | ACTA2,BMP2,CTGF,DSTN,FHL1,G0S2,GSN,IL26,MEIS1,MGST2,PTGS2,S100A9,SMTN,TAGLN |                     |
| IFN alpha/beta     | group                      | np                         | 1.254              | 7.3E-05            | CCL2,GAS7,IL6,IRF1,MMP10,SOCS1,TREM1                                        | 115 (11)            |
| GLI1               | transcription regulator    | np                         | 0.598              | 8.2E-05            | C11orf96,CMBL,DIO2,FHL1,IL6,MAN1C1,PCDH18,PDZRN3,S100A9,VEGFA               |                     |
| LDL                | complex                    | np                         | 0.936              | 8.2E-05            | CTGF,IL1B,IL6,NAMPT,PLAT,SERPINE1,SOCS1                                     | 165 (19)            |
| STK11              | kinase                     | Inhibited                  | -2.578             | 8.2E-05            | CCL2,HIF1A,IL6,NOS2,PTGS2,SERPINE1,VEGFA                                    | 112 (18)            |
| SYK                | kinase                     |                            | 0.796              | 8.4E-05            | CCL2,CITED2,CXCL8,IL6,RGCC                                                  | 137 (18)            |
| SERPINE1           | other                      |                            | -0.277             | 8.4E-05            | ACTA2,CXCL2,FGF2,IL6,TGFBR2                                                 | 124 (17)            |
| PLK2               | kinase                     |                            | -0.447             | 8.4E-05            | CITED2,IL1B,IRF1,PLAT,RGCC                                                  |                     |
| ADA                | enzyme                     | Inhibited                  | -2.184             | 8.4E-05            | CXCL2,HIF1A,IL6,PDE5A,SERPINE1                                              | 72 (6)              |
| ID3                | transcription regulator    | np                         | -0.447             | 8.5E-05            | BCL3,CD44,CEBPB,DTX2,FCER1G,HIF1A,ICAM1,IL7R,JAK2,STAT4,TGFBR3              | 80 (7)              |
| EPHX2              | enzyme                     | np                         | 1.982              | 8.6E-05            | CXCL6,ICAM1,IL1B,IL6                                                        | 151 (20)            |
| Cdk                | group                      | np                         | 1.98               | 8.6E-05            | CCL2,CXCL2,CXCL8,IL6                                                        |                     |
| MAPK13             | kinase                     | np                         | 1.214              | 8.6E-05            | CITED2,IL1B,IL6,MAP3K8                                                      |                     |
| ITGAM              | transmembrane receptor     | np                         | 0.514              | 8.6E-05            | CXCL8,IL1B,IL6,PTGS2                                                        | 146 (17)            |
| HIC1               | transcription regulator    | np                         | -0.378             | 9.2E-05            | ACTA2,AHNAK2,CA12,CDO1,LIF,NOV,SLC7A11                                      |                     |
| RNA polymerase II  | complex                    | np                         |                    | 9.2E-05            | CA12,CXCL2,CXCL8,GHR,ICAM1,IL1B,IL1RN,IL6,MEIS1,NFKBIA,NOS2,PTGS2,RARB      | 85 (5)              |
| STAT1              | transcription regulator    | Activated                  | 2.849              | 9.2E-05            | CCL2,CCL20,CH25H,CXCL2,FCER1G,HIF1A,ICAM1,IFIT1,IL6,IRF1,NOS2,PDGFRB,SOCS1  | 132 (16)            |
| Tlr                | group                      | Activated                  | 2.374              | 9.3E-05            | CCL2,CXCL8,IL1B,IL6,NFKBIA,SOCS1                                            | 152 (16)            |
| CNR1               | g-protein coupled receptor | np                         | -0.093             | 1E-04              | BMP2,BMP4,FGF2,IL6,NDP,NOD2,PDGFRB,PLD1,PTGS2,SLC29A1                       |                     |
| NFATC2             | transcription regulator    | Activated                  | 2.124              | 0.0001             | CITED2,CRYAB,IRF1,NFKBIZ,PLAT,PLD1,PTGS2,SLCO3A1,SOCS1                      |                     |

| Upstream Regulator                          | Molecule Type           | Predicted Activation State | Activation z-score | p-value of overlap | Target Molecules                                               | Mechanistic Network |
|---------------------------------------------|-------------------------|----------------------------|--------------------|--------------------|----------------------------------------------------------------|---------------------|
| let-7a-5p (and other miRNAs w/seed GAGGUAG) | mature microRNA         | np                         | 0.345              | 0.0001             | ACTA2,COL3A1,PRDM1,S100A4,THBS1                                |                     |
| CIDEA                                       | other                   |                            | -0.447             | 0.0001             | CCL2,CIDEA,DIO2,IL6,SERPINE1                                   | 75 (7)              |
| S100A6                                      | transporter             | Inhibited                  | -2.236             | 0.0001             | ATF3,CCL20,CXCL2,CXCL8,TNFAIP3                                 |                     |
| INHBA                                       | growth factor           | np                         | -0.677             | 0.0001             | ACTA2,CCL2,CTGF,PLOD2,S100A9,TAGLN,VEGFA                       | 141 (15)            |
| MDM2                                        | transcription regulator | np                         | -0.243             | 0.00011            | ADIRF,ATF3,CXCL8,HIF1A,HIST2H2AA3/HIST2H2AA4,IL1RN             |                     |
| SMPD2                                       | enzyme                  | np                         |                    | 0.00011            | IL1B,IL6,NOS2                                                  | 94 (10)             |
| HSPB2                                       | other                   | np                         |                    | 0.00011            | CCL2,CXCL8,ICAM1                                               |                     |
| PRTN3                                       | peptidase               | np                         |                    | 0.00011            | CCL2,CXCL8,IL6                                                 | 108 (12)            |
| PTGES3                                      | enzyme                  | np                         |                    | 0.00011            | ABCC3,HIF1A,PMP22                                              |                     |
| DACH1                                       | transcription regulator | np                         |                    | 0.00011            | CXCL8,IL6,SERPINE1                                             |                     |
| SPDEF                                       | transcription regulator | np                         | 0.447              | 0.00011            | BIRC3,COL6A3,CTGF,HIF1A,PLAUR,SDC2,SERPINE1                    |                     |
| TLR1                                        | transmembrane receptor  | np                         | 1.974              | 0.00012            | CXCL8,IL1B,IL6,TNFAIP3                                         | 157 (17)            |
| IL17C                                       | cytokine                | np                         | 1.969              | 0.00012            | CCL20,IL1B,IL6,S100A9                                          |                     |
| ELANE                                       | peptidase               | np                         | 1.067              | 0.00012            | CXCL2,CXCL8,IL1B,SERPINA1                                      | 91 (13)             |
| TNFAIP2                                     | other                   | np                         | 1                  | 0.00012            | CITED2,IRF1,PLAT,SLCO3A1                                       |                     |
| HEXIM1                                      | transcription regulator | np                         | -1.131             | 0.00012            | ANGPT1,FGF2,HIF1A,MMP13                                        |                     |
| PYCARD                                      | transcription regulator | np                         |                    | 0.00012            | ACTA2,CXCL8,IL1B,IL6                                           | 105 (16)            |
| IL36G                                       | cytokine                | np                         |                    | 0.00012            | CCL20,CXCL1,CXCL8,IL6                                          | 73 (7)              |
| RNASE2                                      | enzyme                  | Activated                  | 2.197              | 0.00012            | CCL2,CCL7,CCL8,CXCL5,IL6                                       |                     |
| CASP1                                       | peptidase               | np                         | 0.315              | 0.00012            | ACTA2,CXCL2,IL1B,IL6,NOS2                                      | 156 (16)            |
| CYLD                                        | transcription regulator | np                         | 0.145              | 0.00012            | FCER1G,IL1B,IL6,IL7R,SERPINE1                                  | 160 (18)            |
| ID2                                         | transcription regulator | np                         | -0.447             | 0.00013            | BCL3,CD44,CEBPB,DTX2,FCER1G,HIF1A,ICAM1,IL7R,JAK2,STAT4,TGFBR3 | 80 (7)              |
| RAF1                                        | kinase                  | Activated                  | 2.197              | 0.00015            | IL1B,IL6,MMP1,MMP13,NGF                                        | 165 (20)            |
| VEGFA                                       | growth factor           | np                         | 0.761              | 0.00015            | ANGPT1,F3,FGF2,ICAM1,IL1B,MMP13,NRP1,VEGFA                     | 161 (18)            |
| C5                                          | other                   | np                         | 1.98               | 0.00015            | C5AR1,CXCL2,IL1B,IL6                                           | 150 (13)            |



| Upstream Regulator | Molecule Type              | Predicted Activation State | Activation z-score | p-value of overlap | Target Molecules                                                                   | Mechanistic Network |
|--------------------|----------------------------|----------------------------|--------------------|--------------------|------------------------------------------------------------------------------------|---------------------|
| Gm21596/Hmgb1      | transcription regulator    | np                         | 1.98               | 0.00015            | HIF1A,IL1B,IL6,NOS2                                                                | 190 (23)            |
| HSPD1              | enzyme                     | np                         | 1.944              | 0.00015            | CXCL2,ICAM1,IL1B,IL6                                                               | 131 (18)            |
| FKBP4              | enzyme                     | np                         | 1.718              | 0.00015            | LIF,NKX3-1,NOS2,PDK4                                                               |                     |
| CXCL2              | cytokine                   | np                         | 1.701              | 0.00015            | CXCL2,ICAM1,IL1B,IL6                                                               | 162 (19)            |
| PPP2R5C            | other                      | Inhibited                  | -2                 | 0.00015            | BCL3,BIRC3,CXCL8,TNFAIP3                                                           | 74 (10)             |
| Hmgb1              | transcription regulator    | np                         |                    | 0.00015            | IL1B,IL6,NOS2,SCG2                                                                 | 105 (10)            |
| PLAU               | peptidase                  | np                         | 1.756              | 0.00016            | F3,ICAM1,IL1B,IL6,PLAUR,S100A9                                                     | 125 (19)            |
| IL33               | cytokine                   | np                         | 1.475              | 0.00016            | CXCL2,CXCL8,IL1B,IL6,NFKBIA,NOS2                                                   | 92 (12)             |
| SELPLG             | other                      | Activated                  | 2.236              | 0.00017            | CCL2,CXCL2,CXCL8,IL1B,PLAUR                                                        | 132 (14)            |
| KRT17              | other                      | Activated                  | 2.236              | 0.00017            | CXCL2,CXCL6,IL1B,IL6,MMP13                                                         |                     |
| PRKCB              | kinase                     | np                         | 1.969              | 0.00017            | IL6,NOS2,PTGS2,SERPINE1,TGFBR2                                                     | 153 (18)            |
| TAF4               | transcription regulator    | np                         |                    | 0.00017            | CTGF,GAS6,GREM1,HOPX,IL1RN,MAFF,MMP13,THBS1                                        |                     |
| Fcer1              | complex                    | Activated                  | 2.429              | 0.00018            | CCL2,CXCL8,FYN,IL1B,IL1RN,IL6                                                      | 111 (16)            |
| PAF1               | other                      | np                         | 0.816              | 0.00018            | BAMBI,BIRC3,CITED2,NFKBIZ,PLAUR,SERPINE1                                           |                     |
| let-7              | microna                    | np                         | 0.082              | 0.00018            | ACTA2,COL3A1,PTGS2,S100A4,STARD13,THBS1                                            |                     |
| HTR7               | g-protein coupled receptor | np                         |                    | 0.00019            | IL1B,IL6,THBS1                                                                     | 43 (4)              |
| MED28              | other                      | np                         |                    | 0.00019            | ACTA2,CRIP1,TAGLN                                                                  |                     |
| Cebp               | complex                    | np                         |                    | 0.00019            | CXCL8,IL6,PRLR                                                                     |                     |
| SIAH2              | transcription regulator    | np                         |                    | 0.00019            | AKR1C3,ANGPT1,HIF1A                                                                |                     |
| IL1R2              | transmembrane receptor     | np                         |                    | 0.00019            | CCL20,CXCL8,IL6                                                                    | 113 (10)            |
| PRKRA              | other                      | np                         |                    | 0.00019            | IRF1,NKX3-1,THBS1                                                                  |                     |
| CLIC4              | ion channel                | np                         |                    | 0.00019            | CXCL2,IL1B,IL6                                                                     | 47 (3)              |
| TRPA1              | transporter                | np                         |                    | 0.00019            | IL1B,IL6,NGF                                                                       |                     |
| FPR2               | g-protein coupled receptor | np                         |                    | 0.00019            | CCL2,CXCL8,IL6                                                                     | 147 (17)            |
| THRB               | ligand-dependent           | np                         | -1.726             | 0.00019            | CCL2,CXCL2,FZD4,GCH1,GSN,HIF1A,IL6,MMP1,PTGS2,SFRP4,TREM1                          | 134 (18)            |
| POU5F1             | transcription regulator    | np                         | -0.484             | 0.00019            | ANGPT1,BIRC3,CIDEA,DLX5,HIF1A,HOPX,IL6,MEIS1,NRP1,PCDH18,TNFRSF21,TWIST1,VEGFA,WLS |                     |
| FABP4              | transporter                | np                         | 1.954              | 0.0002             | IL1B,IL6,NOS2,PTGS2                                                                | 166 (17)            |
| LIPG               | enzyme                     | np                         | 1.949              | 0.0002             | CCL2,IL1B,IL6,VEGFA                                                                | 121 (13)            |

| Upstream Regulator | Molecule Type                     | Predicted Activation State | Activation z-score | p-value of overlap | Target Molecules                                                                                                           | Mechanistic Network |
|--------------------|-----------------------------------|----------------------------|--------------------|--------------------|----------------------------------------------------------------------------------------------------------------------------|---------------------|
| ABL1               | kinase                            | np                         | 1.067              | 0.0002             | BMP2,IER3,MMP1,VEGFA                                                                                                       |                     |
| TWIST2             | transcription regulator           | np                         | 0.152              | 0.0002             | CD44,IL1B,TWIST1,ZEB2                                                                                                      |                     |
| SMAD1              | transcription regulator           | np                         | -0.94              | 0.0002             | ACTA2,CTGF,CXCL2,VEGFA                                                                                                     |                     |
| Mt2                | other                             | np                         | -1.982             | 0.0002             | ATF3,IL1B,IL6,SERPINE1                                                                                                     |                     |
| DDX58              | enzyme                            | np                         | 0.734              | 0.0002             | AHNAK,IFIT1,IL6,IRF1,PTGS2,SOCS1                                                                                           | 125 (15)            |
| ADAM17             | peptidase                         | Activated                  | 2.189              | 0.0002             | COL3A1,CXCL2,CXCL8,IL6,MMP13                                                                                               | 143 (20)            |
| ESRRG              | ligand-dependent nuclear receptor | np                         | 0.665              | 0.0002             | FBXO32,HK2,NRP1,PDK4,VEGFA                                                                                                 |                     |
| MSTN               | growth factor                     | np                         | 0.543              | 0.0002             | ACTA2,FBXO32,HIF1A,PID1,VEGFA                                                                                              | 87 (7)              |
| Vegf               | group                             | np                         | 0.378              | 0.0002             | ACTA2,CRTAC1,CXCL8,HOPX,ICAM1,NDP,VEGFA                                                                                    | 96 (7)              |
| ERN1               | kinase                            | np                         | 0.728              | 0.0002             | ANG,ATF3,CEBPB,CXCL2,DNAJB9,IL1B,NOS2,PIGA,SLC25A28                                                                        |                     |
| Pka                | complex                           | np                         | 1.973              | 0.00022            | CD44,CTGF,IL6,IRF1,NGF,NOS2,RGS2                                                                                           | 130 (17)            |
| NR5A2              | ligand-dependent                  | np                         | 0.069              | 0.00024            | CEBPB,ICAM1,IL1B,IL24,IL6,SAA1,TNFRSF1B                                                                                    | 102 (7)             |
| CLEC7A             | transmembrane receptor            | np                         | 1.959              | 0.00025            | CXCL2,IL1B,IL6,PTGS2                                                                                                       | 119 (17)            |
| PRKCI              | kinase                            | np                         | 1.154              | 0.00025            | ELF3,HK2,IL6,PTGS2                                                                                                         | 77 (7)              |
| NCF1               | enzyme                            | np                         | 1.067              | 0.00025            | ACTA2,CD44,ICAM1,SERPINE1                                                                                                  | 137 (11)            |
| NPC2               | other                             | np                         | -1.067             | 0.00025            | AKR1C3,BMP2,PTGS2,STAT4                                                                                                    | 80 (7)              |
| Mt1                | other                             | np                         | -1.982             | 0.00025            | ATF3,IL1B,IL6,SERPINE1                                                                                                     |                     |
| KAT2B              | transcription regulator           | np                         |                    | 0.00025            | CTGF,PRLR,PTGS2,RARB                                                                                                       | 86 (6)              |
| ADORA2A            | g-protein coupled receptor        | np                         | -0.408             | 0.00025            | B4GALT3,COL3A1,CXCL2,DSTN,IL6,NFKBIA,NOS2,PTGS2,VEGFA                                                                      | 106 (16)            |
| S100A9             | other                             | np                         | 1.298              | 0.00026            | ATF3,BCL3,CXCL8,DDIT4,IL1B,IL6,KCNMA1,MMP1,S100A9,WISP2                                                                    | 59 (5)              |
| CXCL12             | cytokine                          | np                         | 0.79               | 0.00027            | ACTA2,CCL2,CD44,CXCL8,DLX5,IL6,MMP13                                                                                       | 128 (18)            |
| HTT                | transcription regulator           | np                         | -1.215             | 0.00027            | ADORA2A,ATF3,ATP6V0E2,CA12,CEBPB,COL6A3,CRYAB,CTGF,DIO2,EPB41L3,FHL1,FXVD6,GPX3,GSN,PLAUR,RARB,SEPP1,SERPINA1,SLC40A1,TGM2 | 50 (5)              |
| VHL                | transcription regulator           | np                         | -1.06              | 0.00027            | CA12,FTH1,HIF1A,SLC40A1,VEGFA                                                                                              | 143 (8)             |
| ITGB2              | transmembrane receptor            | np                         | -1.4               | 0.00027            | ACTA2,CXCL2,IL6,TGFBR2,VEGFA                                                                                               | 97 (10)             |
| mir-1              | microna                           | Inhibited                  | -2.236             | 0.00027            | CCL2,CEBPB,CXCL1,FBXO32,VEGFA                                                                                              |                     |

| Upstream Regulator | Molecule Type              | Predicted Activation State | Activation z-score | p-value of overlap | Target Molecules                                                                                        | Mechanistic Network |
|--------------------|----------------------------|----------------------------|--------------------|--------------------|---------------------------------------------------------------------------------------------------------|---------------------|
| FOLR1              | transporter                | np                         |                    | 0.00027            | AK3,ARHGDI3,BIRC3,CD9,ENTPD7,OSBPL1A,PRLR,S100A4                                                        |                     |
| ESR2               | ligand-dependent           | np                         | -0.475             | 0.00028            | BMP2,BMP4,CCL2,IL1B,MMP1,NDRG2,NKX3-1,NOS2,PTGS2,SFRP4,VEGFA                                            | 153 (18)            |
| LGALS3             | other                      | np                         | 0                  | 0.00029            | COL3A1,ICAM1,IL6,ITGA10,NOS2,PRDM1,SA1                                                                  | 138 (16)            |
| GPR84              | g-protein coupled receptor | np                         |                    | 0.00029            | IL1B,IL6,NOS2                                                                                           |                     |
| PELI1              | enzyme                     | np                         |                    | 0.00029            | IL1B,IL6,NOS2                                                                                           | 114 (17)            |
| S100a7a            | other                      | np                         |                    | 0.00029            | CXCL1,CXCL8,IL11                                                                                        |                     |
| HAS2               | enzyme                     | np                         |                    | 0.00029            | ACTA2,CD44,IL6                                                                                          | 80 (9)              |
| OGG1               | enzyme                     | np                         |                    | 0.00029            | CCL20,CXCL2,IL1B                                                                                        |                     |
| AIF1               | other                      | np                         |                    | 0.00029            | ACTA2,COL3A1,IL6                                                                                        |                     |
| PLA2G5             | enzyme                     | np                         |                    | 0.00029            | COL3A1,PTGS2,VEGFA                                                                                      |                     |
| HBB                | transporter                | np                         |                    | 0.00029            | CXCL8,ICAM1,SERPINE1                                                                                    |                     |
| ACTN4              | transcription regulator    | np                         |                    | 0.00029            | CCL2,CXCL8,IL1B                                                                                         | 77 (6)              |
| DEK                | transcription regulator    | np                         |                    | 0.00029            | BIRC3,CXCL8,NFKBIA                                                                                      | 77 (7)              |
| PSEN1              | peptidase                  | np                         | -0.218             | 0.0003             | ACSL1,CD9,CXCL2,DSTN,FZD4,GPM6B,HIST1H2BD,IL1B,MME,NOS2,PDGFRB,PTGS2,SLC11A2,SOCS1,TGFBR2,TUBA1A,TUBB2B | 138 (14)            |
| Hsp70              | group                      | np                         | 0.063              | 0.00031            | CXCL8,ICAM1,IL1B,IL6                                                                                    | 130 (12)            |
| CD47               | transmembrane receptor     | np                         | -1.667             | 0.00031            | CTSK,IL1B,IL6,NOS2                                                                                      | 107 (9)             |
| TLR6               | transmembrane receptor     | np                         |                    | 0.00031            | ATF3,CXCL8,IL1B,IL6                                                                                     | 170 (20)            |
| FANCC              | other                      | np                         |                    | 0.00031            | AQP9,IL1B,MYOF,NOS2,PTGS2,PTX3                                                                          | 148 (11)            |
| ADRM1              | other                      | np                         |                    | 0.00032            | NFKBIA,NOS2                                                                                             | 114 (6)             |
| DAPK1              | kinase                     | np                         |                    | 0.00032            | CXCL8,IL1B                                                                                              | 112 (6)             |
| GNA14              | enzyme                     | np                         |                    | 0.00032            | CXCL8,IL6                                                                                               |                     |
| LAMA3              | other                      | np                         |                    | 0.00032            | IL1B,MMP1                                                                                               | 114 (12)            |
| LAMA4              | enzyme                     | np                         |                    | 0.00032            | HIF1A,VEGFA                                                                                             |                     |
| SIGLEC11           | other                      | np                         |                    | 0.00032            | IL1B,NOS2                                                                                               |                     |
| IL36RN             | cytokine                   | np                         |                    | 0.00032            | IL1B,IL6                                                                                                |                     |
| GPR32              | g-protein coupled receptor | np                         |                    | 0.00032            | CXCL8,IL6                                                                                               | 72 (7)              |
| TMEM9B             | other                      | np                         |                    | 0.00032            | CXCL8,IL6                                                                                               |                     |
| XPO1               | transporter                | np                         |                    | 0.00032            | ICAM1,NOS2                                                                                              |                     |
| COL17A1            | other                      | np                         |                    | 0.00032            | CXCL8,IL6                                                                                               |                     |

| Upstream Regulator                           | Molecule Type           | Predicted Activation State | Activation z-score | p-value of overlap | Target Molecules                                                | Mechanistic Network |
|----------------------------------------------|-------------------------|----------------------------|--------------------|--------------------|-----------------------------------------------------------------|---------------------|
| TRAF3IP2                                     | other                   | np                         | 1.915              | 0.00032            | CXCL2,CXCL6,IL6,NFKBIZ,ZC3H12A                                  | 105 (12)            |
| IL15                                         | cytokine                | Activated                  | 2.021              | 0.00032            | CCL2,CD44,CXCL2,IL6,IL7R,IRF1,NOS2,TGFBR2                       | 128 (16)            |
| KLF4                                         | transcription regulator | np                         | -0.233             | 0.00034            | ACTA2,ANGPT1,NOS2,NRP1,PCDH18,PLAUR,PRDM1,SOCS1,TAGLN,VEGFA,WLS |                     |
| miR-145-5p (and other miRNAs w/seed UCCAGUU) | mature microRNA         | np                         | 1.341              | 0.00036            | ACTA2,AHNAK,FSCN1,MMP1,TAGLN                                    |                     |
| RAC1                                         | enzyme                  | np                         | 0.896              | 0.00036            | ACTA2,ATF3,IL1B,MMP1,MMP13                                      | 168 (16)            |
| CUX1                                         | transcription regulator | np                         |                    | 0.00036            | ARHGDIB,CXCL1,LIMA1,THBS1,WISP2                                 |                     |
| OSMR                                         | transmembrane receptor  | np                         | 1.982              | 0.00038            | BIRC3,IL6,LBP,SERPINA1                                          |                     |
| ARRB1                                        | other                   | np                         |                    | 0.00038            | F3,NOS2,PTGS2,SERPINE1                                          | 173 (19)            |
| PRMT1                                        | enzyme                  | np                         |                    | 0.00038            | FTH1,MT2A,RARB,SPINK1                                           |                     |
| NEDD9                                        | other                   | Activated                  | 2.236              | 0.00042            | BMP2,DDIT4,ELF3,PLOD2,SERPINE1                                  |                     |
| GPS2                                         | transcription regulator | np                         | 0.447              | 0.00042            | DHRS3,IDH1,PID1,RGL1,SOCS1                                      |                     |
| KLF2                                         | transcription regulator | Inhibited                  | -2.207             | 0.00042            | CXCL2,F3,HIF1A,IL6,PTGS2                                        | 153 (13)            |
| Fibrinogen                                   | complex                 | np                         |                    | 0.00043            | CXCL1,CXCL8,ICAM1                                               | 107 (12)            |
| FAT1                                         | other                   | np                         |                    | 0.00043            | IL1B,IL6,PTGS2                                                  | 79 (7)              |
| MTF1                                         | transcription regulator | np                         |                    | 0.00043            | MMP13,MT2A,PGF                                                  |                     |
| TNFAIP8L2                                    | other                   | np                         |                    | 0.00043            | CXCL2,IL1B,IL6                                                  | 119 (7)             |
| MST1                                         | growth factor           | np                         |                    | 0.00043            | CTGF,IL6,PTGS2                                                  | 61 (6)              |
| MAP3K3                                       | kinase                  | np                         |                    | 0.00043            | CXCL8,IL6,TNFAIP3                                               | 147 (16)            |
| NEK6                                         | kinase                  | np                         |                    | 0.00043            | CITED2,IL6,PTGS2                                                |                     |
| COCH                                         | other                   | np                         |                    | 0.00043            | CXCL2,IL1B,IL6                                                  |                     |
| PDCD4                                        | other                   | np                         |                    | 0.00043            | IL1B,IL6,PTGS2                                                  | 79 (7)              |
| ENTPD1                                       | enzyme                  | np                         |                    | 0.00043            | CXCL2,CXCL8,SERPINE1                                            |                     |
| GAB1                                         | kinase                  | np                         |                    | 0.00043            | ANGPT1,IL1B,IL6                                                 | 135 (14)            |
| AZGP1                                        | transporter             | np                         | -0.192             | 0.00046            | BMP4,CEBPB,FBXO32,HK2                                           |                     |
| GAB2                                         | other                   | np                         | -1                 | 0.00046            | ANGPT1,GSN,IL6,SERPINE1                                         | 81 (9)              |
| LEPR                                         | transmembrane receptor  | np                         | 1.254              | 0.00052            | ACTA2,IL1RN,IL24,IL6,LIF,MMP13,NOS2,SERPINE1,STK17B,TGFBR2      | 192 (19)            |

| Upstream Regulator | Molecule Type              | Predicted Activation State | Activation z-score | p-value of overlap | Target Molecules                             | Mechanistic Network |
|--------------------|----------------------------|----------------------------|--------------------|--------------------|----------------------------------------------|---------------------|
| BCL2               | transporter                | np                         | 1.982              | 0.00054            | ICAM1,IL1B,IL6,PRDM1,VEGFA                   | 109 (17)            |
| MAPK7              | kinase                     | np                         | 0.849              | 0.00056            | CXCL2,IL1B,PTGS2,VEGFA                       | 136 (16)            |
| IL25               | cytokine                   | np                         | -0.247             | 0.00056            | CCL2,CXCL8,IL1B,IL6                          | 162 (20)            |
| PDPK1              | kinase                     | np                         | -1.839             | 0.00056            | CXCL8,IL1B,IL6,SERPINE1                      | 119 (18)            |
| ALOX5              | enzyme                     | np                         | -1.98              | 0.00056            | CTSK,NOS2,PTGS2,SOCS1                        | 148 (18)            |
| HRAS               | enzyme                     | np                         |                    | 0.00056            | CXCL8,IL1B,IL6,PGF,TWIST1,VEGFA              | 133 (16)            |
| MAPK14             | kinase                     | np                         | 1.715              | 0.00058            | CCL2,IL1B,IL6,KITLG,MMP13,NOS2,PTGS2,TGM2    | 161 (20)            |
| IL22               | cytokine                   | Activated                  | 2.219              | 0.00061            | CXCL2,IL1B,LBP,NOS2,SAA1                     | 112 (10)            |
| GPX1               | enzyme                     | np                         | 0.418              | 0.00061            | ACTA2,CTGF,GPX3,ICAM1,IL6                    |                     |
| ABCA1              | transporter                | np                         | -1.619             | 0.00061            | IL1B,IL6,NAMPT,NOS2,PTGS2                    | 140 (16)            |
| PECAM1             | other                      | np                         |                    | 0.00061            | CD44,IL6,THBS1                               | 119 (12)            |
| TRPV1              | ion channel                | np                         |                    | 0.00061            | IL11,IL6,PTGS2                               | 102 (10)            |
| RCAN1              | transcription regulator    | np                         |                    | 0.00061            | CXCL8,IL6,PTGS2                              | 130 (18)            |
| HOXB9              | transcription regulator    | np                         |                    | 0.00061            | ANGPTL2,CXCL8,FGF2                           |                     |
| NCF4               | enzyme                     | np                         |                    | 0.00061            | IL1B,IL6,ST3GAL1                             |                     |
| RLN2               | other                      | np                         |                    | 0.00061            | ACTA2,MMP13,VEGFA                            |                     |
| PARK7              | enzyme                     | np                         |                    | 0.00061            | CXCL8,HIF1A,ICAM1                            | 74 (7)              |
| INS                | other                      | np                         | 1.232              | 0.00062            | ALDH3A2,AQP9,CIDEA,CTGF,F3,HIF1A,PTGS2,VEGFA | 149 (19)            |
| CCR2               | g-protein coupled receptor | np                         | 1.344              | 0.00062            | CCL2,CXCL2,CXCL6,IL1B,IL6,MMP13              | 127 (16)            |
| CEBPD              | transcription regulator    | np                         |                    | 0.00062            | CEBPB,CXCL8,HIF1A,IL1B,IL6,NGF               | 140 (7)             |
| STUB1              | enzyme                     | np                         | 1.225              | 0.00067            | ACTA2,IL6,TAGLN,VEGFA                        | 179 (18)            |
| NFATC3             | transcription regulator    | np                         | 1.199              | 0.00067            | ACTA2,ATF3,DDIT4,PTGS2                       |                     |
| TRPV4              | ion channel                | np                         | 1.131              | 0.00067            | CXCL2,CXCL6,IL6,THBS1                        |                     |
| ANXA1              | enzyme                     | np                         |                    | 0.00067            | IL1B,IL6,NOS2,PTGS2                          | 150 (17)            |
| C3                 | peptidase                  | Activated                  | 2.19               | 0.00068            | CXCL2,IL1B,IL6,NOS2,VEGFA                    | 99 (15)             |
| EPO                | cytokine                   | np                         | 0                  | 0.00074            | BMP4,FGF2,IL6,PTGS2,SLC11A2,SOCS1            | 112 (15)            |
| TRAF3              | enzyme                     | np                         | -1.532             | 0.00074            | BIRC3,CXCL2,IL1B,IL6,NFKBIA,TNFAIP3          | 118 (14)            |
| ZFH3               | transcription regulator    | np                         |                    | 0.00075            | EBF1,ID3,RGS16,RGS2,SERPINA1,TUBA1A,TUBB2B   |                     |
| HMGA1              | transcription regulator    | np                         | -0.49              | 0.00077            | ID3,IER3,KITLG,NOS2,PTGS2                    | 129 (7)             |
| Raf                | group                      | np                         |                    | 0.00077            | IER3,MAFF,SEMA3C,SLC43A3,TNFAIP3             | 115 (7)             |

| Upstream Regulator | Molecule Type              | Predicted Activation State | Activation z-score | p-value of overlap | Target Molecules                                                             | Mechanistic Network |
|--------------------|----------------------------|----------------------------|--------------------|--------------------|------------------------------------------------------------------------------|---------------------|
| ADRA1B             | g-protein coupled receptor | np                         |                    | 0.00077            | CEBPB,COL3A1,IL6,LIF,VEGFA                                                   | 109 (16)            |
| LPIN1              | phosphatase                | np                         | 1.98               | 0.00079            | IL1B,IL6,NOS2,PTGS2                                                          | 163 (20)            |
| CYBB               | enzyme                     | np                         | 1.091              | 0.00079            | COL3A1,CTGF,IL1B,IL6                                                         | 142 (21)            |
| GDF9               | growth factor              | np                         | 0.132              | 0.00079            | CTGF,ID3,KITLG,PTGS2                                                         | 84 (5)              |
| AXL                | kinase                     | np                         | -0.958             | 0.00079            | IL1B,IL6,MMP1,NOS2                                                           | 114 (17)            |
| LEP                | growth factor              | np                         | 1.591              | 0.0008             | ABCC3,ASS1,F3,ICAM1,IDH1,IL1B,IL1RN,IL6,JAK2,NOS2,PTGS2,SEPP1,SERPINE1,VEGFA | 122 (18)            |
| JAK                | group                      | np                         |                    | 0.00083            | FBXO32,IL6,PTGS2                                                             | 84 (9)              |
| PLA2G2D            | enzyme                     | np                         |                    | 0.00083            | IL1B,IL6,S100A9                                                              |                     |
| HIRA               | transcription regulator    | np                         |                    | 0.00083            | CXCL2,CXCL6,PGF                                                              |                     |
| NDFIP1             | other                      | np                         |                    | 0.00083            | IL1B,IL6,SLC11A2                                                             | 161 (17)            |
| IL21               | cytokine                   | np                         | 1.763              | 0.00086            | CCL20,CD38,IL6,IL7R,NOS2,PRDM1,SOCS1                                         | 138 (18)            |
| MAVS               | other                      | np                         | 0.652              | 0.00086            | CXCL2,IFIT1,IL1B,IL6,SOCS1                                                   | 95 (16)             |
| NKX2-1             | transcription regulator    | np                         |                    | 0.00092            | BTG3,IER3,KITLG,MTUS1,PGM3,PRRX2,SERPINE1,THBS1,THY1,VEGF A                  |                     |
| ALOX15             | enzyme                     | np                         | 0.626              | 0.00093            | ICAM1,IL6,NOS2,RGS2                                                          | 82 (7)              |
| PLK4               | kinase                     | np                         | 0                  | 0.00093            | CITED2,IL1B,IRF1,PLAT                                                        |                     |
| PTPN6              | phosphatase                | np                         | -1.516             | 0.00093            | CD44,IL1B,IL6,IRF1                                                           | 98 (14)             |
| Ikb                | group                      | np                         |                    | 0.00094            | MMP1,MMP13                                                                   |                     |
| lipoxigenas        | group                      | np                         |                    | 0.00094            | CCL2,RGS2                                                                    |                     |
| Cpla2              | group                      | np                         |                    | 0.00094            | PTGS2,VEGFA                                                                  | 127 (12)            |
| IKK (complex)      | complex                    | np                         |                    | 0.00094            | BIRC3,CXCL8                                                                  | 12 (4)              |
| DGKH               | kinase                     | np                         |                    | 0.00094            | CCL2,CXCL8                                                                   | 134 (11)            |
| HMX2               | transcription regulator    | np                         |                    | 0.00094            | BMP4,DLX5                                                                    |                     |
| THBD               | transmembrane receptor     | np                         |                    | 0.00094            | IL1B,IL6                                                                     | 89 (12)             |
| DLX4               | transcription regulator    | np                         |                    | 0.00094            | FGF2,VEGFA                                                                   |                     |
| BAG4               | other                      | np                         |                    | 0.00094            | IL1B,IL6                                                                     | 144 (12)            |
| FGA                | other                      | np                         |                    | 0.00094            | IL1B,IL6                                                                     |                     |
| FGG                | other                      | np                         |                    | 0.00094            | IL1B,IL6                                                                     |                     |

| Upstream Regulator     | Molecule Type              | Predicted Activation State | Activation z-score | p-value of overlap | Target Molecules                                                        | Mechanistic Network |
|------------------------|----------------------------|----------------------------|--------------------|--------------------|-------------------------------------------------------------------------|---------------------|
| Orm1 (includes others) | other                      | np                         |                    | 0.00094            | IL6,NOS2                                                                |                     |
| LPA                    | other                      | np                         |                    | 0.00094            | CXCL8,SERPINE1                                                          |                     |
| TAB2                   | other                      | np                         |                    | 0.00094            | CD82,NOS2                                                               | 104 (11)            |
| CDH4                   | other                      | np                         |                    | 0.00094            | MMP1,PTGS2                                                              |                     |
| PIP5K1B                | kinase                     | np                         |                    | 0.00094            | IL1B,IL6                                                                | 139 (14)            |
| FBXL5                  | enzyme                     | np                         |                    | 0.00094            | FTH1,SLC11A2                                                            |                     |
| LPAR3                  | g-protein coupled receptor | np                         |                    | 0.00094            | CXCL8,IL6                                                               |                     |
| WRN                    | enzyme                     | np                         |                    | 0.00094            | CXCL8,HIF1A                                                             |                     |
| BTC                    | growth factor              | np                         |                    | 0.00094            | CCL20,IL6                                                               |                     |
| NKRF                   | transcription regulator    | np                         |                    | 0.00094            | CXCL8,NOS2                                                              |                     |
| SMAD6                  | transcription regulator    | np                         |                    | 0.00094            | IL6,NOS2                                                                | 61 (6)              |
| CBX5                   | transcription regulator    | np                         | -0.113             | 0.00094            | AKR1C3,C15orf48,CXCL5,HIST2H2AA3/HIST2H2AA4,LAMB3,PRSS23,RARRES3,SBSPON |                     |
| CREM                   | transcription regulator    | np                         |                    | 0.00094            | ATF3,CEBPB,CH25H,COL3A1,DIO2,NOS2,THBS1,VEGFA                           |                     |
| DMD                    | other                      | np                         |                    | 0.00097            | FBXO32,KCNMA1,MALL,NDRG2,PAMR1,PDK4,PPP1R3C,SCIN,SEPP1,WWC1             |                     |
| CSF2                   | cytokine                   | Activated                  | 2.314              | 0.00097            | CCL2,CD38,CXCL8,ICAM1,IER3,IL1B,IL6,IRAK3,NOS2,PMP22,TGM2,TNFRSF1B      | 163 (18)            |
| NR1I3                  | ligand-dependent           | np                         | 1.153              | 0.00098            | ABCC3,GSTM1,ICAM1,INSIG2,MAFF,SAT1,SLC29A1                              |                     |
| TET2                   | other                      | np                         | 1.414              | 0.001              | AFF3,AHNAK,BCL3,C5AR1,IL1B,MAFF,MMP13,PDGFRB                            |                     |
| CBFB                   | transcription regulator    | np                         | -0.447             | 0.00104            | ICAM1,MMP13,NRP1,STAT4,TGFBR2,TGFBR3                                    |                     |
| Hbb-b1                 | transporter                | np                         | 0.762              | 0.00106            | CD44,FTH1,ICAM1,IL1B,PRLR                                               | 86 (6)              |
| NCOA2                  | transcription regulator    | np                         | 0.156              | 0.00106            | BMP2,IL1B,IL6,MMP13,PTGS2                                               | 129 (15)            |
| LRP6                   | transmembrane receptor     | np                         |                    | 0.00108            | ACTA2,HK2,IL6,PRLR                                                      |                     |
| PTHLH                  | other                      | np                         |                    | 0.00108            | ANGPT1,IL6,RGS2,SERPINE1                                                |                     |
| NELFB                  | other                      | np                         |                    | 0.00109            | ATF3,CTGF,VEGFA                                                         |                     |
| mir-127                | microrna                   | np                         |                    | 0.00109            | IL1B,IL6,NOS2                                                           |                     |

| Upstream Regulator | Molecule Type              | Predicted Activation State | Activation z-score | p-value of overlap | Target Molecules                           | Mechanistic Network |
|--------------------|----------------------------|----------------------------|--------------------|--------------------|--------------------------------------------|---------------------|
| EREG               | growth factor              | np                         |                    | 0.00109            | FGF2,IL6,PGF                               |                     |
| PAEP               | other                      | np                         |                    | 0.00109            | CXCL1,CXCL5,VEGFA                          |                     |
| THBS1              | other                      | np                         |                    | 0.00109            | IL1B,IL6,THBS1                             | 99 (7)              |
| PLAT               | peptidase                  | np                         |                    | 0.00109            | IL1B,NOS2,SERPINE1                         | 124 (15)            |
| EBF1               | transcription regulator    | np                         | 0.762              | 0.00111            | CD79B,DLX5,EBF1,HK2,IL6,IRF1,PPP1R3C,SOCS1 | 86 (8)              |
| BTK                | kinase                     | np                         | 0.295              | 0.00112            | CD38,CEBPB,CXCL8,IFIT1,IL1B,IL6,IRF1       | 117 (16)            |
| RIPK2              | kinase                     | Activated                  | 2.439              | 0.00112            | ACSL1,CXCL2,ICAM1,IL6,NOS2,SLC2A6          | 95 (13)             |
| SIRT6              | enzyme                     | np                         |                    | 0.00118            | ACSL4,CXCL8,IL6,PIGA,PTGS2                 | 162 (22)            |
| HDAC4              | transcription regulator    | np                         | 0.747              | 0.0012             | ATF3,HIF1A,IL6,MMP13,PTGS2,RGS2,VEGFA      | 141 (7)             |
| ADIPOQ             | other                      | np                         | 0.53               | 0.0012             | ACSL1,CCL2,COL3A1,IL6,NFKBIA,NOS2,PTGS2    | 164 (20)            |
| RUNX2              | transcription regulator    | np                         | 1.775              | 0.00122            | ACTA2,HIF1A,MMP13,PCDH18,SERPINE1,TAGLN    | 9 (2)               |
| FGF8               | growth factor              | np                         | -0.655             | 0.00122            | BMP2,BMP4,CCL2,CRIP1,CRYAB,LAMB3           |                     |
| KIT                | transmembrane receptor     | np                         |                    | 0.00122            | CD44,ICAM1,KITLG,LIF,MGST2,SOCS1           | 121 (7)             |
| IL6R               | transmembrane receptor     | np                         | 1.969              | 0.00125            | ABCC3,MMP13,PTGS2,VEGFA                    | 105 (11)            |
| ANXA2              | other                      | np                         | 0.684              | 0.00125            | ANG,IL6,MMP1,PTGS2                         | 151 (16)            |
| PTX3               | other                      | np                         | 0.324              | 0.00125            | CTGF,CXCL2,IL1B,IL6                        | 95 (11)             |
| OLR1               | transmembrane receptor     | np                         | 0                  | 0.00125            | IL6,MMP1,TGFBR2,TGFBR3                     | 69 (7)              |
| MMP14              | peptidase                  | np                         | -0.132             | 0.00125            | ATF3,CSPG4,IL6,VEGFA                       | 118 (10)            |
| SRC (family)       | group                      | np                         |                    | 0.00125            | BMP2,ICAM1,IL6,PTGS2                       | 105 (14)            |
| ZBTB20             | transcription regulator    | np                         | 0.44               | 0.0013             | GAS6,GHR,IL6,NFKBIA,PDK4                   |                     |
| PTPN1              | phosphatase                | np                         | 0.152              | 0.0013             | CIDEA,CXCL2,NFKBIA,NOS2,SOCS1              | 106 (11)            |
| ADRA1D             | g-protein coupled receptor | np                         |                    | 0.0013             | CEBPB,COL3A1,IL6,LIF,VEGFA                 | 125 (16)            |
| PRDM1              | transcription regulator    | Inhibited                  | -2.219             | 0.00136            | CXCL2,CXCL6,ID3,IL1B,IL24,IL6,PRDM1        | 85 (8)              |
| TNFSF14            | cytokine                   | np                         |                    | 0.0014             | BIRC3,ICAM1,IL6                            | 127 (12)            |
| BGN                | other                      | np                         |                    | 0.0014             | CCL2,CXCL8,IL1B                            | 124 (11)            |
| MAFK               | transcription regulator    | np                         |                    | 0.0014             | ABCC3,ABCC4,PRDM1                          |                     |



| Upstream Regulator | Molecule Type              | Predicted Activation State | Activation z-score | p-value of overlap | Target Molecules                 | Mechanistic Network |
|--------------------|----------------------------|----------------------------|--------------------|--------------------|----------------------------------|---------------------|
| TACR1              | g-protein coupled receptor | np                         |                    | 0.0014             | IL1B,IL6,PTGS2                   | 153 (18)            |
| THY1               | other                      | np                         |                    | 0.0014             | MMP10,MMP13,VEGFA                |                     |
| DLX3               | transcription regulator    | np                         |                    | 0.0014             | ELF3,PGF,S100A9                  |                     |
| ADAM15             | peptidase                  | np                         |                    | 0.0014             | CD44,IL6,VEGFA                   | 79 (10)             |
| PTTG1              | transcription regulator    | np                         | 1.177              | 0.00144            | CD44,FGF2,HIF1A,VEGFA            |                     |
| CHRNA7             | transmembrane receptor     | np                         | -1.987             | 0.00144            | CXCL2,IL1B,IL1RN,IL6             | 152 (14)            |
| PIK3CA             | kinase                     | np                         |                    | 0.00144            | NOS2,PDGFRB,THY1,TWIST1          |                     |
| GTF2B              | transcription regulator    | np                         |                    | 0.00144            | GHR,NFKBIA,PRLR,TNFAIP3          |                     |
| NCOA3              | transcription regulator    | np                         |                    | 0.00144            | FGF2,IRF1,PTGS2,RARB,TAGLN       |                     |
| PARP1              | enzyme                     | Activated                  | 2.413              | 0.00153            | ICAM1,IL1B,IL6,NOS2,PTGS2,SOCS1  | 168 (18)            |
| ADRA1A             | g-protein coupled receptor | np                         |                    | 0.00158            | CEBPB,COL3A1,IL6,LIF,VEGFA       | 117 (17)            |
| PIK3CG             | kinase                     | np                         | 1.235              | 0.00164            | CTSK,ICAM1,IL1B,IL6              | 129 (19)            |
| RPSA               | translation regulator      | np                         | -1.96              | 0.00164            | IL1B,IL6,NOS2,PTGS2              | 142 (17)            |
| CHADL              | other                      | Inhibited                  | -2                 | 0.00164            | CRYAB,CSPG4,IL6,PTX3             |                     |
| APOA1              | transporter                | Inhibited                  | -2                 | 0.00164            | ICAM1,IL1B,IL6,NOS2              | 125 (15)            |
| PAX7               | transcription regulator    | np                         | -0.14              | 0.00165            | ASS1,GCH1,ID3,MYO1D,PARM1,PRSS23 |                     |
| SRC                | kinase                     | Activated                  | 2.105              | 0.00174            | CXCL8,HIF1A,ICAM1,IL6,VEGFA      | 109 (17)            |
| RGS10              | other                      | np                         |                    | 0.00174            | CCL2,CXCL2,CXCL6,IL1B,TNFRSF1B   |                     |
| SIGIRR             | transmembrane receptor     | np                         |                    | 0.00175            | CXCL2,IL1B,IL6                   | 132 (11)            |
| ITCH               | enzyme                     | np                         |                    | 0.00175            | CTGF,IL1B,IL6                    | 150 (19)            |
| BCL2L11            | other                      | np                         |                    | 0.00175            | CXCL2,IL1B,IL6                   | 62 (5)              |
| CX3CL1             | cytokine                   | np                         |                    | 0.00175            | HIF1A,ICAM1,IL6                  | 164 (19)            |
| FASN               | enzyme                     | np                         |                    | 0.00175            | CXCL8,IL6,PTGS2                  | 73 (7)              |
| ADRB1              | g-protein coupled receptor | np                         |                    | 0.00175            | COL3A1,NGF,THBS1                 | 87 (7)              |
| TNFRSF9            | transmembrane receptor     | np                         |                    | 0.00175            | ALDH1A2,IL1B,IL6                 | 65 (7)              |

| Upstream Regulator                          | Molecule Type              | Predicted Activation State | Activation z-score | p-value of overlap | Target Molecules                    | Mechanistic Network |
|---------------------------------------------|----------------------------|----------------------------|--------------------|--------------------|-------------------------------------|---------------------|
| FADD                                        | other                      | np                         | -0.816             | 0.00177            | BIRC3,CXCL2,ICAM1,IL6,SOCS1,TNFAIP3 | 163 (16)            |
| TGFBR                                       | group                      | np                         |                    | 0.00185            | ACTA2,CD44                          |                     |
| TNIP3                                       | other                      | np                         |                    | 0.00185            | CXCL8,IL6                           | 61 (6)              |
| RSPO3                                       | kinase                     | np                         |                    | 0.00185            | IL6,PTGS2                           | 79 (7)              |
| B3GNT2                                      | enzyme                     | np                         |                    | 0.00185            | IL1B,IL6                            | 106 (11)            |
| CYP2C8                                      | enzyme                     | np                         |                    | 0.00185            | IL1B,IL6                            |                     |
| IgG2a                                       | complex                    | np                         |                    | 0.00185            | IL1B,IL6                            | 111 (11)            |
| GPR132                                      | g-protein coupled receptor | np                         |                    | 0.00185            | ICAM1,IL6                           | 92 (7)              |
| KHSRP                                       | enzyme                     | np                         |                    | 0.00185            | IL1B,NOS2                           | 90 (10)             |
| miR-133a-3p (and other miRNAs w/seed match) | mature microRNA            | np                         |                    | 0.00185            | CTGF,FSCN1                          |                     |
| MB                                          | transporter                | np                         |                    | 0.00185            | HIF1A,VEGFA                         |                     |
| EIF2AK1                                     | kinase                     | np                         |                    | 0.00185            | IL1B,IL6                            |                     |
| DNAJA3                                      | other                      | np                         |                    | 0.00185            | CXCL8,VEGFA                         | 156 (14)            |
| CD163                                       | transmembrane receptor     | np                         |                    | 0.00185            | IL1B,IL6                            | 79 (7)              |
| IGBP1                                       | phosphatase                | np                         |                    | 0.00185            | IRF1,NOS2                           |                     |
| ITGAX                                       | transmembrane receptor     | np                         |                    | 0.00185            | CXCL8,IL1B                          |                     |
| PINK1                                       | kinase                     | np                         |                    | 0.00185            | HIF1A,VEGFA                         | 140 (7)             |
| ACOD1                                       | enzyme                     | np                         |                    | 0.00185            | IL6,TNFAIP3                         | 101 (10)            |
| CTSK                                        | peptidase                  | np                         |                    | 0.00185            | IL6,PTGS2                           |                     |
| RTKN                                        | other                      | np                         |                    | 0.00185            | BIRC3,TNFAIP3                       |                     |
| TNFAIP8                                     | other                      | np                         |                    | 0.00185            | IL1B,IL6                            |                     |
| FBLN5                                       | other                      | np                         |                    | 0.00185            | SERPINA1,TWIST1                     |                     |
| PPP2R5B                                     | phosphatase                | np                         |                    | 0.00185            | SAT1,SLC22A4                        |                     |
| GNA15                                       | enzyme                     | np                         |                    | 0.00185            | CXCL8,IL6                           |                     |
| CCR5                                        | g-protein coupled receptor | np                         | 0.927              | 0.00187            | CXCL2,F3,SERPINA1,TNFRSF1B          | 80 (7)              |
| ZBED6                                       | other                      | np                         | 0.577              | 0.00187            | CRIM1,DDIT4,KITLG,WWC1              |                     |
| GHR                                         | transmembrane receptor     | np                         | -1.067             | 0.00187            | GHR,IL1B,IL6,PRLR                   | 116 (11)            |

| Upstream Regulator | Molecule Type                     | Predicted Activation State | Activation z-score | p-value of overlap | Target Molecules                                       | Mechanistic Network |
|--------------------|-----------------------------------|----------------------------|--------------------|--------------------|--------------------------------------------------------|---------------------|
| NCOR2              | transcription regulator           | np                         |                    | 0.00187            | BIRC3,CXCL8,PTGS2,RARB                                 | 77 (8)              |
| AKT1               | kinase                            | np                         | 1.698              | 0.0019             | ACTA2,CIDEA,FBXO32,IL6,PDGFRB,SERPINE1                 | 140 (11)            |
| NCOA1              | transcription regulator           | np                         |                    | 0.0019             | FGF2,IL6,NFKBIZ,PRLR,RARB,SERPINE1                     |                     |
| RETNLB             | other                             | np                         | -0.128             | 0.00204            | ACTA2,CCL2,CTGF,DNER,IL1B,STK17B                       |                     |
| THRA               | ligand-dependent                  | np                         | -0.64              | 0.00204            | CCL2,CXCL2,IL6,IRF1,RARB,TREM1                         | 116 (13)            |
| HDAC6              | transcription regulator           | np                         | -0.247             | 0.00212            | HIF1A,IL6,NOS2,SERPINE1                                | 185 (20)            |
| CBX7               | other                             | np                         |                    | 0.00216            | BMP2,CXCL8,PRDM1                                       |                     |
| DPH5               | enzyme                            | np                         |                    | 0.00216            | IL1B,IRF1,NFKBIA                                       |                     |
| CD200              | other                             | np                         |                    | 0.00216            | IL1B,IL6,NOS2                                          | 141 (13)            |
| COL2A1             | other                             | np                         |                    | 0.00216            | COL3A1,IL1B,MMP13                                      | 73 (6)              |
| ANGPT1             | growth factor                     | np                         |                    | 0.00216            | COL3A1,ICAM1,VEGFA                                     | 87 (7)              |
| CAPN3              | peptidase                         | np                         |                    | 0.00216            | FTH1,GPX3,PTGS2                                        |                     |
| NOS1               | enzyme                            | np                         |                    | 0.00216            | FBXO32,HIF1A,PDE5A                                     |                     |
| PTPN22             | phosphatase                       | np                         |                    | 0.00216            | IL1B,IL6,NOS2                                          |                     |
| VTN                | other                             | np                         |                    | 0.00216            | F3,IL1B,SERPINE1                                       | 87 (8)              |
| ERG                | transcription regulator           | np                         | 1                  | 0.00222            | ABCC4,CDK5RAP2,CXCL1,DSTN,EPB41L3,FHL1,FYN,MYO1D,PLAUR |                     |
| NR4A2              | ligand-dependent nuclear receptor | np                         | -1.446             | 0.00227            | CCL20,KCNMA1,MMP1,PTX3,SLC39A8                         |                     |
| SIN3A              | transcription regulator           | np                         |                    | 0.00227            | CTSK,FBXO32,PTGS2,RARB,S100A9                          | 51 (4)              |
| HSF1               | transcription regulator           | np                         | -0.906             | 0.00232            | CRYAB,HSPB1,ICAM1,IL1B,IL6,IL7R,LIF,RARRES3,RRAD       | 142 (15)            |
| UXT                | transcription regulator           | np                         | 0.762              | 0.00239            | CXCL8,NFKBIA,NKX3-1,TNFAIP3                            | 74 (7)              |
| MITF               | transcription regulator           | np                         | -1.219             | 0.00253            | ACAN,CD44,CTSK,CXCL8,FBXO32,HIF1A,SEMA3C,SERPINE1      |                     |
| Ren2               | peptidase                         | np                         |                    | 0.00263            | COL3A1,MMP13,VEGFA                                     | 62 (5)              |
| TFEC               | transcription regulator           | np                         |                    | 0.00263            | COL6A3,IL6,S100A9                                      |                     |
| PHB2               | transcription regulator           | np                         |                    | 0.00263            | BMP2,IL11,SOCS1                                        |                     |

| Upstream Regulator | Molecule Type              | Predicted Activation State | Activation z-score | p-value of overlap | Target Molecules                                              | Mechanistic Network |
|--------------------|----------------------------|----------------------------|--------------------|--------------------|---------------------------------------------------------------|---------------------|
| PLAUR              | transmembrane receptor     | np                         |                    | 0.00263            | C5AR1,CCL2,PLAUR                                              |                     |
| CRHR1              | g-protein coupled receptor | np                         |                    | 0.00263            | HSD11B1,KCNMA1,KCNMB1                                         |                     |
| MAP3K1             | kinase                     | np                         |                    | 0.00263            | COL3A1,SERPINE1,THBS1                                         | 119 (7)             |
| SKI                | transcription regulator    | np                         |                    | 0.00263            | ACTA2,PMP22,SERPINE1                                          |                     |
| BRD4               | kinase                     | np                         |                    | 0.00266            | ABCC4,BCL3,CXCL2,PIM2,PRDM1,SLC7A2                            |                     |
| REL                | transcription regulator    | np                         | 1.342              | 0.00267            | ACSL4,BCL3,CXCL8,ICAM1,IL6,MAP3K8,NFKBIA,NOS2,PLA2G16,TNFAIP3 | 76 (7)              |
| SUMO3              | other                      | np                         | 1                  | 0.00268            | CD38,IL6,NOV,TNFRSF21                                         |                     |
| MERTK              | kinase                     | np                         | -0.958             | 0.00268            | IL1B,IL6,NOS2,RGCC                                            | 108 (14)            |
| MTOR               | kinase                     | np                         | 0.936              | 0.00274            | AKR1B1,CEBPB,HIF1A,HSD11B1,HSPB1,IL6,IRF1,NOS2,SERPINA1       | 138 (21)            |
| PPARD              | ligand-dependent           | np                         | -0.037             | 0.00285            | ACTA2,ALDH3A2,CEBPB,GAS6,IL6,PKD4,PTGS2,THBS1,VEGFA           | 137 (21)            |
| PIN1               | enzyme                     | np                         | 1                  | 0.00299            | COL3A1,IL1B,IL6,NFE2L1                                        | 129 (17)            |
| BCL2L1             | other                      | np                         | -1.067             | 0.00299            | CD44,IL1B,THBS1,TNFRSF21                                      | 67 (7)              |
| GMNN               | transcription regulator    | np                         | 0.816              | 0.00302            | ANGPT1,FGF2,NRP1,PCDH18,VEGFA,WLS                             |                     |
| PDX1               | transcription regulator    | np                         |                    | 0.00302            | CD44,FGF2,IDH1,PRSS23,SCG2,TGFBR3                             |                     |
| TEAD               | group                      | np                         |                    | 0.00304            | CD44,CTGF                                                     |                     |
| C1q                | complex                    | np                         |                    | 0.00304            | CCL2,CXCL8                                                    |                     |
| FFAR4              | g-protein coupled receptor | np                         |                    | 0.00304            | CXCL8,PTGS2                                                   | 119 (7)             |
| WBSCR22            | enzyme                     | np                         |                    | 0.00304            | CXCL8,IL6                                                     |                     |
| SMAD1/5            | group                      | np                         |                    | 0.00304            | ID3,PLAUR                                                     |                     |
| IgG2b              | complex                    | np                         |                    | 0.00304            | IL1B,IL6                                                      |                     |
| SELL               | transmembrane receptor     | np                         |                    | 0.00304            | IL1B,IL6                                                      | 78 (7)              |
| ANG                | enzyme                     | np                         |                    | 0.00304            | CCL8,IL6                                                      |                     |
| PSMB9              | peptidase                  | np                         |                    | 0.00304            | NFKBIA,TNFAIP3                                                | 49 (3)              |
| ERCC4              | enzyme                     | np                         |                    | 0.00304            | GHR,PRLR                                                      | 87 (7)              |
| CSK                | kinase                     | np                         |                    | 0.00304            | IL1B,IL6                                                      | 127 (16)            |
| ETV1               | transcription regulator    | np                         |                    | 0.00304            | MMP1,MMP13                                                    |                     |
| ERCC1              | enzyme                     | np                         |                    | 0.00304            | GHR,PRLR                                                      | 87 (7)              |

| Upstream Regulator | Molecule Type              | Predicted Activation State | Activation z-score | p-value of overlap | Target Molecules                      | Mechanistic Network |
|--------------------|----------------------------|----------------------------|--------------------|--------------------|---------------------------------------|---------------------|
| TAF10              | transcription regulator    | np                         |                    | 0.00304            | GHR,PRLR                              |                     |
| MAPK10             | kinase                     | np                         |                    | 0.00304            | CXCL8,IL6                             | 79 (7)              |
| BDKRB1             | g-protein coupled receptor | np                         |                    | 0.00304            | CTGF,CXCL6                            | 92 (7)              |
| TBXA2R             | g-protein coupled receptor | np                         |                    | 0.00304            | ICAM1,PTGS2                           | 85 (6)              |
| MARCO              | transmembrane receptor     | np                         |                    | 0.00304            | IL1B,IL6                              | 87 (7)              |
| PPP2R2A            | phosphatase                | np                         |                    | 0.00304            | SAT1,SLC22A4                          |                     |
| STX2               | transporter                | np                         |                    | 0.00304            | BMP2,BMP4                             | 79 (7)              |
| NAA10              | enzyme                     | np                         |                    | 0.00304            | TGFBR3,VEGFA                          |                     |
| S1PR3              | g-protein coupled receptor | np                         |                    | 0.00304            | CD44,PTGS2                            | 74 (7)              |
| Wfdc17             | other                      | np                         |                    | 0.00304            | IL1B,IL6                              |                     |
| TBL1XR1            | transcription regulator    | np                         |                    | 0.00304            | CXCL2,RARB                            | 9 (2)               |
| RHO                | g-protein coupled receptor | np                         | 0.447              | 0.00315            | CD44,CEBPB,HK2,SEPP1,TNFAIP3          |                     |
| CD4                | transmembrane receptor     | np                         |                    | 0.00315            | F3,HIF1A,MME                          | 90 (7)              |
| GADD45A            | other                      | np                         |                    | 0.00315            | CXCL2,IL1B,IL6                        | 142 (15)            |
| TGFB3              | growth factor              | np                         |                    | 0.00315            | PLOD2,VEGFA,ZEB2                      |                     |
| NCR2               | transmembrane receptor     | np                         |                    | 0.00315            | CCL20,PTGS2,THBS1                     |                     |
| SMARCC1            | transcription regulator    | np                         |                    | 0.00315            | CD79B,EBF1,IL7R                       |                     |
| ETS2               | transcription regulator    | np                         | 0.152              | 0.00333            | BMP4,MMP1,MMP13,PLA2G16               |                     |
| GLI2               | transcription regulator    | np                         |                    | 0.0034             | CXCL2,CXCL6,IL1B,IL6,MMP13            |                     |
| MYOC               | other                      | np                         |                    | 0.00363            | CD44,DDIT4,FBXO32,FSCN1,SLC7A11,TGIF1 |                     |
| KDM1A              | enzyme                     | np                         |                    | 0.00367            | ARHGDIB,BMP2,GLT8D2,RARB,SFRP4        |                     |
| CXCL8              | cytokine                   | np                         | 1.312              | 0.0037             | COL12A1,CXCL8,IL1B,PTGS2              | 118 (20)            |
| MBTD1              | other                      | np                         | 1                  | 0.0037             | AQP9,NFKBIA,SEPP1,STAT4               |                     |
| NQO1               | enzyme                     | np                         | 0                  | 0.0037             | BIRC3,C5AR1,NOS2,PTGS2                | 154 (19)            |

| Upstream Regulator | Molecule Type                     | Predicted Activation State | Activation z-score | p-value of overlap | Target Molecules                                                             | Mechanistic Network |
|--------------------|-----------------------------------|----------------------------|--------------------|--------------------|------------------------------------------------------------------------------|---------------------|
| BACH2              | transcription regulator           | np                         | -1.964             | 0.0037             | ID3,IL6,PRDM1,S100A9                                                         | 25 (3)              |
| Smad2/3            | group                             | np                         |                    | 0.00373            | MMP10,SERPINE1,TGM2                                                          |                     |
| TLR8               | transmembrane receptor            | np                         |                    | 0.00373            | CXCL8,IL1B,IL6                                                               | 142 (16)            |
| USP18              | peptidase                         | np                         |                    | 0.00373            | IL6,IRF1,SOCS1                                                               | 103 (14)            |
| BACH1              | transcription regulator           | np                         |                    | 0.00373            | FTH1,MMP1,SLC7A11                                                            |                     |
| NOX4               | enzyme                            | np                         |                    | 0.00373            | HIF1A,SERPINE1,VEGFA                                                         | 100 (11)            |
| HNF4A              | transcription regulator           | np                         | -1.857             | 0.00388            | ACSL1,AHNAK,CRIP1,CXCL8,FHL1,FXVD6,GALM,GSN,IL6,PRDM1,RARB, SERPINA1,TNFAIP6 |                     |
| MAP2K1             | kinase                            | np                         | 0.602              | 0.00395            | ATF3,CTGF,F3,MMP1,NET1                                                       | 148 (16)            |
| CASZ1              | enzyme                            | np                         | 1.982              | 0.00409            | ENPP1,ITGA10,MYOF,TNFRSF1B                                                   |                     |
| TWIST1             | transcription regulator           | np                         | 1.96               | 0.00409            | CCL2,CD44,MMP1,VEGFA                                                         |                     |
| SUMO2              | enzyme                            | np                         | 1                  | 0.00409            | CD38,IL6,NOV, TNFRSF21                                                       |                     |
| FST                | other                             | np                         | 1                  | 0.00409            | ACSL1,CIDEA,SAA1,SERPINA1                                                    |                     |
| KRT14              | other                             | np                         |                    | 0.00409            | CXCL1,CXCL8,MMP1,MMP13                                                       |                     |
| NR1H4              | ligand-dependent nuclear receptor | np                         | -1.118             | 0.0041             | ABCC3,ABCC4,ACTA2,CEBPB,IL1B,IL6,RARB                                        | 125 (15)            |
| IFNL1              | cytokine                          | np                         | 0.655              | 0.00425            | ATF3,CXCL8,IFIT1,IL6,RARRES3                                                 | 99 (9)              |
| Ifn gamma          | complex                           | np                         |                    | 0.00437            | ICAM1,JAK2,NOS2                                                              | 127 (14)            |
| WWTR1              | transcription regulator           | np                         |                    | 0.00437            | CD44,CTGF,SERPINE1                                                           |                     |
| WLS                | other                             | np                         |                    | 0.00437            | BMP4,CCL20,CXCL2                                                             |                     |
| PDGFB              | growth factor                     | np                         |                    | 0.00437            | ACTA2,PDGFRB,VEGFA                                                           |                     |
| CX3CR1             | g-protein coupled receptor        | np                         |                    | 0.00437            | IL1B,IL6,NOS2                                                                | 107 (11)            |
| CRHR2              | g-protein coupled receptor        | np                         |                    | 0.00437            | CXCL2,KCNMA1,KCNMB1                                                          |                     |
| DUSP5              | phosphatase                       | np                         |                    | 0.00437            | CH25H,IL11,PRDM1                                                             |                     |
| FSHB               | other                             | np                         |                    | 0.00437            | CTGF,KITLG,PLAT                                                              |                     |
| SREBF1             | transcription regulator           | Activated                  | 2.386              | 0.00449            | ACSL1,ACSL4,BHLHE41,FBXO32,GPX3,HK2,SERPINE1,VEGFA                           |                     |
| Agtr1b             | g-protein coupled receptor        | np                         |                    | 0.00451            | NOS2,PTGS2                                                                   |                     |

| Upstream Regulator | Molecule Type              | Predicted Activation State | Activation z-score | p-value of overlap | Target Molecules                | Mechanistic Network |
|--------------------|----------------------------|----------------------------|--------------------|--------------------|---------------------------------|---------------------|
| CaMKII             | complex                    | np                         |                    | 0.00451            | BIRC3,IL1B                      | 89 (7)              |
| CLEC6A             | transmembrane receptor     | np                         |                    | 0.00451            | IL1B,IL6                        |                     |
| HLA-DQ             | complex                    | np                         |                    | 0.00451            | IL1B,IL6                        | 125 (7)             |
| PDGFRB             | kinase                     | np                         |                    | 0.00451            | ACTA2,PDGFRB                    |                     |
| AKAP12             | transporter                | np                         |                    | 0.00451            | ANGPT1,HIF1A                    |                     |
| HYOU1              | other                      | np                         |                    | 0.00451            | IL6,NOS2                        |                     |
| MEFV               | other                      | np                         |                    | 0.00451            | CXCL8,IL1B                      | 67 (7)              |
| mir-143            | microna                    | np                         |                    | 0.00451            | HK2,TAGLN                       |                     |
| mir-150            | microna                    | np                         |                    | 0.00451            | CXCL2,FZD4                      |                     |
| AMBP               | transporter                | np                         |                    | 0.00451            | CXCL2,IL1B                      | 94 (7)              |
| PTGIR              | g-protein coupled receptor | np                         |                    | 0.00451            | IL1B,IL6                        |                     |
| SRSF3              | other                      | np                         |                    | 0.00451            | CXCL8,VEGFA                     | 79 (7)              |
| IL9R               | transmembrane receptor     | np                         |                    | 0.00451            | BCL3,IL6                        |                     |
| FCER2              | transmembrane receptor     | np                         |                    | 0.00451            | CXCL8,NOS2                      | 78 (7)              |
| CD74               | transmembrane receptor     | np                         |                    | 0.00451            | CXCL8,HIF1A                     | 74 (7)              |
| IKBKAP             | other                      | np                         |                    | 0.00451            | BMP4,VEGFA                      | 154 (17)            |
| F13A1              | enzyme                     | np                         |                    | 0.00451            | IL1B,IL6                        |                     |
| HBEGF              | growth factor              | np                         |                    | 0.00451            | NRP1,PDK4                       |                     |
| VIPR1              | g-protein coupled receptor | np                         |                    | 0.00451            | IRF1,NOS2                       | 75 (7)              |
| SDC1               | enzyme                     | np                         |                    | 0.00451            | IL6,TGM2                        |                     |
| TBL1X              | transcription regulator    | np                         |                    | 0.00451            | CXCL2,RARB                      | 9 (3)               |
| TARBP2             | other                      | np                         |                    | 0.00451            | NKX3-1,THBS1                    |                     |
| SERPIND1           | other                      | np                         |                    | 0.00451            | IL1B,IL6                        |                     |
| SF1                | transcription regulator    | np                         |                    | 0.00451            | ACTA2,ICAM1                     |                     |
| SULT1E1            | enzyme                     | np                         |                    | 0.00451            | PTGS2,TNFAIP6                   |                     |
| NPPA               | other                      | np                         |                    | 0.00451            | IL1B,PTGS2                      |                     |
| ERCC3              | enzyme                     | np                         |                    | 0.00451            | GHR,PRLR                        |                     |
| IFNA2              | cytokine                   | np                         | 0.246              | 0.00458            | FGF2,HIF1A,IFIT1,IL6,IRF1,SOCS1 | 116 (15)            |

| Upstream Regulator | Molecule Type              | Predicted Activation State | Activation z-score | p-value of overlap | Target Molecules                                         | Mechanistic Network |
|--------------------|----------------------------|----------------------------|--------------------|--------------------|----------------------------------------------------------|---------------------|
| BCR (complex)      | complex                    | Activated                  | 2.205              | 0.00485            | CD44,FCMR,JAK2,NAMPT,PRDM1,PTGS2                         | 91 (10)             |
| GATA4              | transcription regulator    | np                         | -0.537             | 0.00496            | COL3A1,CTGF,DIO2,ECM2,FGF2,PRDM1,S100A4                  |                     |
| POR                | enzyme                     | np                         | 0.6                | 0.00505            | ABCC3,ACSL1,ALDH1A2,GSTM1,HIF1A,PDK4,PNPLA7,TUBB2B,VEGFA |                     |
| ZMPSTE24           | peptidase                  | np                         |                    | 0.00508            | GHR,JAK2,SOCS1                                           |                     |
| PIAS1              | transcription regulator    | np                         |                    | 0.00508            | ACTA2,RRAD,TAGLN                                         |                     |
| AURKB              | kinase                     | np                         |                    | 0.00508            | ATF3,CD82,IER3                                           |                     |
| NOG                | growth factor              | np                         |                    | 0.00508            | BMP4,ID3,MMP13                                           |                     |
| MAP2K6             | kinase                     | np                         |                    | 0.00508            | CCL8,CRYAB,NOS2                                          |                     |
| TNFSF15            | cytokine                   | np                         |                    | 0.00508            | BIRC3,CXCL2,CXCL8                                        | 145 (16)            |
| PDGFC              | growth factor              | np                         |                    | 0.00508            | ACTA2,PDGFRB,VEGFA                                       | 14 (3)              |
| FOXM1              | transcription regulator    | np                         | 1.016              | 0.00541            | IL6,PLAUR,TGFBR2,TWIST1,VEGFA,ZEB2                       |                     |
| IRF2               | transcription regulator    | np                         | 0.75               | 0.00543            | IL1B,IL6,IRF1,PTGS2                                      | 104 (13)            |
| Hbb-b2             | other                      | np                         |                    | 0.00543            | CD44,FTH1,IL1B,PRLR                                      |                     |
| NLRP3              | other                      | np                         | 0.97               | 0.0056             | ACTA2,CXCL2,IL1B,IL6,LIF                                 | 159 (18)            |
| ZBTB16             | transcription regulator    | np                         | 0.391              | 0.0056             | BMP2,IL6,IL7R,NFKBIZ,PTGS2                               | 12 (2)              |
| WT1                | transcription regulator    | np                         | 0                  | 0.00582            | CCL2,CSPG4,HCFC1R1,IL11,IL1B,PLAUR,SERPINE1,THBS1,VEGFA  |                     |
| Fc gamma receptor  | group                      | np                         |                    | 0.00585            | CXCL8,IL6,NOS2                                           | 162 (19)            |
| DCAF1              | other                      | np                         |                    | 0.00585            | NKX3-1,NOV,TGM2                                          |                     |
| AMH                | growth factor              | np                         |                    | 0.00585            | CXCL2,IER3,IRF1                                          | 91 (10)             |
| NFAT5              | transcription regulator    | np                         |                    | 0.00585            | DDIT4,S100A4,SLC7A2                                      |                     |
| IL23A              | cytokine                   | np                         |                    | 0.00585            | IL1B,IL6,S100A9                                          | 78 (8)              |
| MMP2               | peptidase                  | np                         |                    | 0.00585            | IL1RN,JAK2,SOCS1                                         | 100 (11)            |
| DRD2               | g-protein coupled receptor | np                         |                    | 0.00585            | CRYAB,TGFBR2,VEGFA                                       |                     |
| PCDH11Y            | other                      | np                         |                    | 0.00585            | BMP4,CD44,PTGS2                                          | 79 (7)              |
| RCE1               | peptidase                  | np                         |                    | 0.00593            | CRIP1,CRYAB,PRRX2,WISP2                                  |                     |
| SYK/ZAP            | group                      | np                         |                    | 0.00624            | IL6,PTGS2                                                | 134 (18)            |



| Upstream Regulator | Molecule Type           | Predicted Activation State | Activation z-score | p-value of overlap | Target Molecules               | Mechanistic Network |
|--------------------|-------------------------|----------------------------|--------------------|--------------------|--------------------------------|---------------------|
| ANKRD42            | transcription regulator | np                         |                    | 0.00624            | IL1B,IL6                       |                     |
| TRIM38             | other                   | np                         |                    | 0.00624            | CXCL8,IL6                      | 153 (19)            |
| NLRX1              | other                   | np                         |                    | 0.00624            | IL1B,IL6                       | 129 (13)            |
| EGLN2              | enzyme                  | np                         |                    | 0.00624            | CXCL8,HIF1A                    |                     |
| S100A10            | other                   | np                         |                    | 0.00624            | IL6,MMP1                       |                     |
| TYRO3              | kinase                  | np                         |                    | 0.00624            | IL1B,IL6                       | 69 (5)              |
| HIPK1              | kinase                  | np                         |                    | 0.00624            | MMP10,VEGFA                    |                     |
| MAFF               | transcription regulator | np                         |                    | 0.00624            | ABCC3,ABCC4                    |                     |
| TNFRSF25           | transmembrane receptor  | np                         |                    | 0.00624            | CCL2,CXCL8                     | 114 (12)            |
| CYP4F2             | enzyme                  | np                         |                    | 0.00624            | IL6,VEGFA                      | 79 (7)              |
| C6                 | other                   | np                         |                    | 0.00624            | CXCL2,IL1B                     |                     |
| TMPO               | other                   | np                         |                    | 0.00624            | COL12A1,COL3A1                 |                     |
| MMP8               | peptidase               | np                         |                    | 0.00624            | CXCL8,IL6                      | 95 (11)             |
| TAZ                | enzyme                  | np                         |                    | 0.00624            | CTGF,TAGLN                     |                     |
| RBCK1              | transcription regulator | np                         |                    | 0.00624            | ICAM1,TNFAIP3                  |                     |
| CCL11              | cytokine                | np                         |                    | 0.00624            | CXCL2,IL6                      | 58 (4)              |
| ATF5               | transcription regulator | np                         |                    | 0.00624            | SAA1,SAA2                      |                     |
| MYOCD              | transcription regulator | np                         | -0.797             | 0.00637            | ACTA2,COL3A1,ECM2,S100A4,TAGLN |                     |
| Ccl2               | cytokine                | np                         | 1.072              | 0.00647            | CTSK,CXCL2,IL1B,IL6            | 136 (20)            |
| TNFSF11            | cytokine                | np                         | -0.455             | 0.00647            | CTSK,IL6,NFKBIA,NOS2           | 157 (19)            |
| HAND2              | transcription regulator | np                         |                    | 0.00647            | COL3A1,ECM2,GREM1,S100A4       |                     |
| NPM1               | transcription regulator | np                         |                    | 0.00668            | CXCL2,IL6,VEGFA                |                     |
| HSP90B1            | other                   | np                         |                    | 0.00668            | IL1B,IL6,NOS2                  | 122 (11)            |
| KEAP1              | transcription regulator | np                         |                    | 0.00668            | CTSK,IL1B,IL6                  | 60 (6)              |
| IL4R               | transmembrane receptor  | np                         |                    | 0.00668            | ACSL1,IL1B,NOS2                | 106 (11)            |
| CLU                | other                   | np                         |                    | 0.00668            | CXCL8,IL6,NFKBIA               | 102 (13)            |
| TNFSF10            | cytokine                | np                         |                    | 0.00668            | CXCL8,IL1RN,NFKBIA             | 77 (7)              |

| Upstream Regulator                    | Molecule Type           | Predicted Activation State | Activation z-score | p-value of overlap | Target Molecules                                     | Mechanistic Network |
|---------------------------------------|-------------------------|----------------------------|--------------------|--------------------|------------------------------------------------------|---------------------|
| THBS4                                 | other                   | np                         |                    | 0.00668            | COL3A1,ICAM1,MMP13                                   |                     |
| KCNE3                                 | ion channel             | np                         |                    | 0.00679            | AKR1C3,PRDM1,PTGS2,STAT4,TNFAIP6                     |                     |
| IL2                                   | cytokine                | np                         | 1.738              | 0.00682            | CD44,CD9,IL1B,IL26,IL6,IL7R,IRF1,NOS2,PRDM1,STK17B   | 151 (17)            |
| YAP1                                  | transcription regulator | np                         |                    | 0.00703            | ACTA2,CTGF,FBXO32,TAGLN                              |                     |
| EIF4E                                 | translation regulator   | np                         | 1.706              | 0.00708            | CEBPB,FGF2,GPX3,HIF1A,NFKBIA,NRP1,PGF                |                     |
| XBP1                                  | transcription regulator | np                         | 1.369              | 0.00713            | CXCL2,DNAJB9,ICAM1,IL24,IL6,NOS2,PIGA,PRDM1,SERPINA1 | 107 (14)            |
| ALDH2                                 | enzyme                  | np                         |                    | 0.00758            | SHMT1,SLC7A11,SLC7A5                                 |                     |
| COL4A3                                | other                   | np                         |                    | 0.00758            | COL3A1,CTGF,PTGS2                                    |                     |
| COMMD1                                | transporter             | np                         |                    | 0.00758            | DDIT4,HK2,VEGFA                                      |                     |
| RBM5                                  | other                   | np                         | -0.254             | 0.00763            | BIRC3,GPER1,ICAM1,IL32                               |                     |
| miR-146a-5p (and other miRNAs w/seed) | mature microRNA         | Inhibited                  | -2                 | 0.00763            | CCL2,CXCL8,LBP,NOS2                                  | 151 (16)            |
| NFKB2                                 | transcription regulator | np                         |                    | 0.00763            | BIRC3,BMP2,CCL20,PTGS2                               | 92 (11)             |
| CDKN1B                                | kinase                  | np                         | -0.128             | 0.00774            | FHL1,RRAD,S100A9,SEPP1,SHMT1,TWIST1                  |                     |
| SIRT3                                 | enzyme                  | np                         |                    | 0.00822            | DIO2,IL1B                                            |                     |
| LTBP4                                 | growth factor           | np                         |                    | 0.00822            | BMP4,GREM1                                           |                     |
| PRF1                                  | other                   | np                         |                    | 0.00822            | CD44,IL6                                             |                     |
| TTN                                   | kinase                  | np                         |                    | 0.00822            | CRYAB,FHL1                                           |                     |
| DCLK1                                 | kinase                  | np                         |                    | 0.00822            | TWIST1,ZEB2                                          |                     |
| PLTP                                  | enzyme                  | np                         |                    | 0.00822            | IL1B,IL6                                             | 92 (7)              |
| NKX2-3                                | transcription regulator | np                         |                    | 0.00822            | BMP2,BMP4                                            |                     |
| ING4                                  | transcription regulator | np                         |                    | 0.00822            | IL6,NFKBIA                                           | 79 (7)              |
| TIA1                                  | other                   | np                         |                    | 0.00822            | PTGS2,VEGFA                                          |                     |
| ERP29                                 | transporter             | np                         |                    | 0.00822            | TWIST1,ZEB2                                          |                     |
| CPEB1                                 | translation regulator   | np                         |                    | 0.00822            | IL6,TWIST1                                           |                     |
| ARF6                                  | transporter             | np                         |                    | 0.00822            | IL1B,IL6                                             | 109 (12)            |

| Upstream Regulator | Molecule Type              | Predicted Activation State | Activation z-score | p-value of overlap | Target Molecules                                       | Mechanistic Network |
|--------------------|----------------------------|----------------------------|--------------------|--------------------|--------------------------------------------------------|---------------------|
| MSX1               | transcription regulator    | np                         |                    | 0.00822            | BMP2,BMP4                                              |                     |
| HSPG2              | enzyme                     | np                         |                    | 0.00822            | ACAN,ACTA2                                             |                     |
| PHB                | transcription regulator    | np                         |                    | 0.00822            | CXCL8,IL1B                                             | 121 (11)            |
| VCP                | enzyme                     | np                         |                    | 0.00822            | CCL2,CXCL8                                             |                     |
| SMAD5              | transcription regulator    | np                         |                    | 0.00822            | ID3,VEGFA                                              |                     |
| PTGER1             | g-protein coupled receptor | np                         |                    | 0.00822            | CXCL8,ICAM1                                            |                     |
| ACE2               | peptidase                  | np                         |                    | 0.00822            | ACTA2,SERPINE1                                         |                     |
| ACTG1              | other                      | np                         |                    | 0.00822            | ACTA2,TAGLN                                            |                     |
| Havcr1             | other                      | np                         |                    | 0.00822            | IL1B,IL6                                               |                     |
| IL6ST              | transmembrane receptor     | np                         |                    | 0.00826            | IL6,ORM1,SOCS1,TNFRSF1B                                | 84 (8)              |
| PELP1              | other                      | np                         |                    | 0.00826            | BMP2,COL12A1,FYN,NKX3-1                                | 73 (7)              |
| RORA               | ligand-dependent           | np                         | 1.667              | 0.0083             | CH25H,IL1B,IL6,NFKBIA,PPP1R3C,S100A9,SLC16A10,SLC25A24 |                     |
| CD24               | other                      | np                         |                    | 0.00852            | ATF3,CXCL8,ICAM1,LPP,MTUS1,THBS1                       |                     |
| Ciap               | group                      | np                         |                    | 0.00856            | CXCL2,IL1B,IL6                                         | 82 (7)              |
| HLX                | transcription regulator    | np                         |                    | 0.00856            | BMP2,CXCL8,PRDM1                                       |                     |
| SAA1               | transporter                | np                         |                    | 0.00856            | CXCL8,IL1B,IL1RN                                       | 160 (17)            |
| HSD17B4            | enzyme                     | np                         |                    | 0.00856            | ACSL1,BMP2,PDK4                                        |                     |
| HOXA9              | transcription regulator    | np                         |                    | 0.00856            | CCL2,ENPP1,IL7R                                        |                     |
| MUC1               | other                      | np                         |                    | 0.00856            | CXCL8,HIF1A,IL6                                        | 157 (17)            |
| FGFR1              | kinase                     | Activated                  | 2.2                | 0.00864            | BMP4,FGF2,IL11,IL6,PTGS2                               | 128 (15)            |
| SOX1               | transcription regulator    | np                         | 1.342              | 0.00864            | ANGPT1,NRP1,PCDH18,VEGFA,WLS                           |                     |
| NR1I2              | ligand-dependent           | np                         | 0.16               | 0.00871            | ABCC3,ALDH3A2,ANG,GSTM1,IL6,INSIG2,TGM2                |                     |
| BAX                | transporter                | np                         |                    | 0.00892            | CTSK,DNAJB9,IL6,TGM2                                   |                     |
| PRKAA              | group                      | np                         |                    | 0.0096             | HSD11B1,IL6,NOS2                                       | 153 (13)            |
| TYK2               | kinase                     | np                         |                    | 0.0096             | C5AR1,IL1B,IRF1                                        | 82 (7)              |
| PDCD1              | phosphatase                | np                         |                    | 0.00961            | CXCL8,IL6,NOS2,SLC7A5                                  | 124 (16)            |
| BRD2               | kinase                     | np                         |                    | 0.00961            | IL1B,IL6,NFIB,STAT4                                    |                     |

| Upstream Regulator | Molecule Type           | Predicted Activation State | Activation z-score | p-value of overlap | Target Molecules                                                  | Mechanistic Network |
|--------------------|-------------------------|----------------------------|--------------------|--------------------|-------------------------------------------------------------------|---------------------|
| SOX3               | transcription regulator | np                         | 1.342              | 0.00969            | ANGPT1,NRP1,PCDH18,VEGFA,WLS                                      |                     |
| RORC               | ligand-dependent        | np                         |                    | 0.0102             | CCL20,IL1B,IL6,PPP1R3C,S100A9,SLC16A10,SLC25A24                   |                     |
| IKZF1              | transcription regulator | np                         | 1                  | 0.0103             | C1QTNF1,CD79B,IL7R,KITLG,TMEM119,UACA                             |                     |
| IRF3               | transcription regulator | np                         | 0.447              | 0.0103             | CCL2,CXCL8,IFIT1,IL1B,IL6,NOS2                                    |                     |
| MAPK1              | kinase                  | np                         | 0.971              | 0.0103             | CFB,COL7A1,FCMR,IFIT1,LIF,NRP1,PLD1,PTGS2,RGS16,TMEM158, TNFRSF1B |                     |
| PRNP               | other                   | np                         | 1                  | 0.0103             | CCL2,CD44,IL6,PLAUR                                               |                     |
| Notch              | group                   | np                         | -1.154             | 0.0103             | IL6,NET1,TAGLN,ZEB2                                               |                     |
| TGFBR1             | kinase                  | np                         | -1.941             | 0.0103             | ACTA2,BMP4,CTGF,PKD4                                              |                     |
| WWC1               | transcription regulator | np                         |                    | 0.0104             | BMP2,CTGF                                                         |                     |
| OSCAR              | other                   | np                         |                    | 0.0104             | CXCL8,ICAM1                                                       |                     |
| NEK7               | kinase                  | np                         |                    | 0.0104             | PTGS2,RGCC                                                        |                     |
| STK17A             | kinase                  | np                         |                    | 0.0104             | MT1H,MT1M                                                         |                     |
| C1QA               | peptidase               | np                         |                    | 0.0104             | C5AR1,IL6                                                         |                     |
| UNC5B              | transmembrane receptor  | np                         |                    | 0.0104             | CXCL2,IL6                                                         |                     |
| TRPM2              | ion channel             | np                         |                    | 0.0104             | CXCL8,NOS2                                                        |                     |
| MALT1              | peptidase               | np                         |                    | 0.0104             | CD44,IL6                                                          |                     |
| TPM3               | other                   | np                         |                    | 0.0104             | MMP1,VEGFA                                                        |                     |
| RLIM               | enzyme                  | np                         |                    | 0.0104             | CTGF,SERPINE1                                                     |                     |
| LY96               | transmembrane receptor  | np                         |                    | 0.0104             | CXCL2,IL6                                                         |                     |
| mir-199            | microna                 | np                         |                    | 0.0104             | HIF1A,NOS2                                                        |                     |
| LGALS3BP           | transmembrane receptor  | np                         |                    | 0.0104             | IL6,MMP13                                                         |                     |
| ALOX15B            | enzyme                  | np                         |                    | 0.0104             | NKX3-1,VEGFA                                                      |                     |
| DDR1               | kinase                  | np                         |                    | 0.0104             | COL3A1,MMP1                                                       |                     |
| KIF3A              | enzyme                  | np                         |                    | 0.0104             | MMP13,VEGFA                                                       |                     |
| ERBB3              | kinase                  | np                         |                    | 0.0104             | PTGS2,VEGFA                                                       |                     |
| TAC1               | other                   | np                         |                    | 0.0104             | IL1B,IL6                                                          |                     |
| USP19              | peptidase               | np                         |                    | 0.0104             | BIRC3,FBXO32                                                      |                     |

| Upstream Regulator | Molecule Type              | Predicted Activation State | Activation z-score | p-value of overlap | Target Molecules                                                      | Mechanistic Network |
|--------------------|----------------------------|----------------------------|--------------------|--------------------|-----------------------------------------------------------------------|---------------------|
| FHL2               | transcription regulator    | np                         |                    | 0.0104             | ACTA2,PDGFRB                                                          |                     |
| RIPK3              | kinase                     | np                         |                    | 0.0104             | IL1B,IL6                                                              |                     |
| S1PR1              | g-protein coupled receptor | np                         |                    | 0.0104             | IL6,PTGS2                                                             |                     |
| CDK8               | kinase                     | np                         |                    | 0.0104             | CD44,RARB                                                             |                     |
| SMURF2             | enzyme                     | np                         |                    | 0.0104             | SERPINE1,TGIF1                                                        |                     |
| PTGFR              | g-protein coupled receptor | np                         |                    | 0.0104             | PRLR,PTGS2                                                            |                     |
| AEBP1              | peptidase                  | np                         |                    | 0.0104             | ACTA2,NOS2                                                            |                     |
| Hsp27              | group                      | np                         |                    | 0.0107             | CXCL8,IL6,PTGS2                                                       |                     |
| NFYB               | transcription regulator    | np                         |                    | 0.0107             | FTH1,MMP13,S100A4                                                     |                     |
| CARM1              | transcription regulator    | np                         |                    | 0.0107             | FTH1,ICAM1,SPINK1                                                     |                     |
| BTNL2              | transmembrane receptor     | np                         | 0.447              | 0.0108             | APPL2,CNN3,IL6,S100A4,TNFRSF1B                                        |                     |
| CST5               | other                      | np                         | -0.905             | 0.0109             | AHNAK,CD44,COL12A1,CYBRD1,FHL1,ID3,KIAA0101,NRP1,SLC7A11,STEAP1,TGIF1 |                     |
| SIRT1              | transcription regulator    | np                         | -1.242             | 0.0117             | BIRC3,FBXO32,HIF1A,IL1B,IL6,MMP13,PKD4,RGS16                          |                     |
| YBX1               | transcription regulator    | np                         |                    | 0.0119             | ACTA2,CXCL2,PTGS2                                                     |                     |
| BRAF               | kinase                     | np                         |                    | 0.0119             | BIRC3,HIF1A,MMP1                                                      |                     |
| KMT2D              | transcription regulator    | np                         | -0.726             | 0.0125             | BTG3,CRIP1,CSPG4,EBPL,FHL1,GPRC5C,IRF1,LAMB3                          |                     |
| LMNB1              | other                      | np                         |                    | 0.0127             | CRIP1,CRYAB,PRRX2,WISP2                                               |                     |
| BDNF               | growth factor              | np                         |                    | 0.0128             | CSPG4,FSCN1,GAS6,NOS2,S100A9,THBS1                                    |                     |
| EPHB1              | kinase                     | np                         |                    | 0.0129             | PTGS2,SERPINE1                                                        |                     |
| ADCY               | group                      | np                         |                    | 0.0129             | COL3A1,FGF2                                                           |                     |
| KDM8               | other                      | np                         |                    | 0.0129             | CTSK,HK2                                                              |                     |
| NQO2               | enzyme                     | np                         |                    | 0.0129             | NOS2,PTGS2                                                            |                     |
| LILRA2             | other                      | np                         |                    | 0.0129             | CXCL8,IL6                                                             |                     |
| hemoglobin         | complex                    | np                         |                    | 0.0129             | CXCL8,SLC40A1                                                         |                     |
| MGP                | other                      | np                         |                    | 0.0129             | ACTA2,TAGLN                                                           |                     |
| EIF4G2             | translation regulator      | np                         |                    | 0.0129             | HIF1A,PLAT                                                            |                     |

| Upstream Regulator | Molecule Type              | Predicted Activation State | Activation z-score | p-value of overlap | Target Molecules              | Mechanistic Network |
|--------------------|----------------------------|----------------------------|--------------------|--------------------|-------------------------------|---------------------|
| TAF5               | transcription regulator    | np                         |                    | 0.0129             | GHR,PRLR                      |                     |
| LILRB4             | other                      | np                         |                    | 0.0129             | IL1B,IL6                      |                     |
| MAFG               | transcription regulator    | np                         |                    | 0.0129             | ABCC3,ABCC4                   |                     |
| PDE3B              | enzyme                     | np                         |                    | 0.0129             | IL6,SERPINE1                  |                     |
| MTA3               | enzyme                     | np                         |                    | 0.0129             | CD79B,PRDM1                   |                     |
| TNFSF13B           | cytokine                   | np                         |                    | 0.0129             | CXCL6,PRDM1                   |                     |
| P2RY2              | g-protein coupled receptor | np                         |                    | 0.0129             | CXCL8,SERPINE1                |                     |
| BCL6B              | transcription regulator    | np                         |                    | 0.0129             | S100A4,VEGFA                  |                     |
| SFTPA1             | transporter                | np                         |                    | 0.0129             | IL1B,IL6                      |                     |
| DDX17              | enzyme                     | np                         |                    | 0.0129             | NET1,S100A4                   |                     |
| HNRNPU             | transporter                | np                         |                    | 0.0129             | IL1B,IL6                      |                     |
| MMP1               | peptidase                  | np                         |                    | 0.0129             | HIF1A,MMP1                    |                     |
| IL3                | cytokine                   | np                         |                    | 0.0131             | BIRC3,IL1B,IL6                |                     |
| HOXC8              | transcription regulator    | np                         |                    | 0.0131             | ASS1,PMP22,TAGLN              |                     |
| AMPK               | complex                    | np                         | 0.157              | 0.0136             | HIF1A,IL6,NOS2,VEGFA          |                     |
| FGF21              | growth factor              | np                         |                    | 0.0145             | CIDEA,DIO2,GHR                |                     |
| MAP2K4             | kinase                     | np                         |                    | 0.0145             | BIRC3,IL6,PTGS2               |                     |
| JAK1               | kinase                     | np                         |                    | 0.0145             | CCL2,IL1B,IRF1                |                     |
| UPF2               | other                      | np                         |                    | 0.0145             | NRP1,PTGS2,TNFAIP3            |                     |
| ABCG1              | transporter                | np                         |                    | 0.0145             | CH25H,IL1B,IL6                |                     |
| SMAD2              | transcription regulator    | np                         | -1.628             | 0.0145             | ACTA2,CTGF,NET1,SERPINE1      |                     |
| LYN                | kinase                     | np                         |                    | 0.0145             | C5AR1,FYN,IL1B,IL6            |                     |
| ITK                | kinase                     | np                         | 0.271              | 0.0147             | CD44,CRIM1,FCER1G,HIF1A,STAT4 |                     |
| KITLG              | growth factor              | np                         | 1.933              | 0.0155             | CCL2,IL1B,IL6,PTGS2           |                     |
| CSHL1              | growth factor              | np                         | 0.293              | 0.0155             | ACTA2,BMP2,CTGF,IRF1          |                     |
| PSEN2              | peptidase                  | np                         | 0.2                | 0.0155             | ACSL1,CD9,FZD4,PDGFRB,PTGS2   |                     |
| CARD9              | other                      | np                         |                    | 0.0156             | CXCL2,IL6                     |                     |
| SLC51A             | transporter                | np                         |                    | 0.0156             | ABCC3,ABCC4                   |                     |
| LECT2              | other                      | np                         |                    | 0.0156             | IL1B,IL6                      |                     |
| Traj18             | other                      | np                         |                    | 0.0156             | CXCL2,IL6                     |                     |

| Upstream Regulator                    | Molecule Type              | Predicted Activation State | Activation z-score | p-value of overlap | Target Molecules          | Mechanistic Network |
|---------------------------------------|----------------------------|----------------------------|--------------------|--------------------|---------------------------|---------------------|
| Focal adhesion kinase                 | group                      | np                         |                    | 0.0156             | ICAM1,IL6                 |                     |
| NOTCH4                                | transcription regulator    | np                         |                    | 0.0156             | ACTA2,SERPINE1            |                     |
| ZBP1                                  | other                      | np                         |                    | 0.0156             | IL6,NFKBIA                |                     |
| TAF1                                  | transcription regulator    | np                         |                    | 0.0156             | GHR,PRLR                  |                     |
| miR-125b-5p (and other miRNAs w/seed) | mature microRNA            | np                         |                    | 0.0156             | C10orf54,NOS2             |                     |
| SMURF1                                | enzyme                     | np                         |                    | 0.0156             | IRF1,NOS2                 |                     |
| CD69                                  | transmembrane receptor     | np                         |                    | 0.0156             | IL1B,S100A9               |                     |
| TNC                                   | other                      | np                         |                    | 0.0156             | CCL20,IL6                 |                     |
| OSTM1                                 | other                      | np                         |                    | 0.0156             | CTSK,PRDM1                |                     |
| HSF4                                  | transcription regulator    | np                         |                    | 0.0156             | HIF1A,LIF                 |                     |
| SMPD1                                 | enzyme                     | np                         |                    | 0.0156             | ACTA2,IL6                 |                     |
| EDNRB                                 | g-protein coupled receptor | np                         |                    | 0.0156             | HIF1A,VEGFA               |                     |
| SH3BP2                                | other                      | np                         |                    | 0.0156             | CD44,CTSK                 |                     |
| EFNB2                                 | other                      | np                         |                    | 0.0156             | ANGPT1,IL7R               |                     |
| CCL3L3                                | cytokine                   | np                         |                    | 0.0156             | IL1B,IL6                  |                     |
| TRIM21                                | enzyme                     | np                         |                    | 0.0156             | IL1B,IL6                  |                     |
| TAS1R3                                | g-protein coupled receptor | np                         |                    | 0.0156             | DDIT4,SLC7A11             |                     |
| IGF2                                  | growth factor              | np                         |                    | 0.0159             | HIF1A,PTGS2,VEGFA         |                     |
| FN1                                   | enzyme                     | np                         |                    | 0.0159             | IL1B,MMP1,TGM2            |                     |
| AGTR1                                 | g-protein coupled receptor | np                         |                    | 0.0159             | COL3A1,PTGS2,SERPINE1     |                     |
| BNIP3L                                | other                      | np                         | -1.732             | 0.0165             | CD79B,GSN,NFKBIA,PDGFRB   |                     |
| CAV1                                  | transmembrane receptor     | np                         |                    | 0.017              | HK2,IL6,PRLR,SLC7A2,THBS1 |                     |

| Upstream Regulator    | Molecule Type           | Predicted Activation State | Activation z-score | p-value of overlap | Target Molecules     | Mechanistic Network |
|-----------------------|-------------------------|----------------------------|--------------------|--------------------|----------------------|---------------------|
| SOX9                  | transcription regulator | np                         |                    | 0.0173             | CTGF,CYP26B1,GAS7    |                     |
| IL27RA                | transmembrane receptor  | np                         |                    | 0.0173             | CD44,IL6,PRDM1       |                     |
| TRAF2                 | enzyme                  | np                         | 1.387              | 0.0175             | BIRC3,CCL2,CXCL8,IL6 |                     |
| HP1                   | group                   | np                         |                    | 0.0178             | PTGS2                |                     |
| GPSM3                 | other                   | np                         |                    | 0.0178             | IL1B                 |                     |
| AMOT                  | other                   | np                         |                    | 0.0178             | CTGF                 |                     |
| PRR5                  | other                   | np                         |                    | 0.0178             | PDGFRB               |                     |
| TRIM72                | enzyme                  | np                         |                    | 0.0178             | ACTA2                |                     |
| Rsk                   | group                   | np                         |                    | 0.0178             | CXCL8                |                     |
| PI3K p85              | group                   | np                         |                    | 0.0178             | IL6                  |                     |
| Pld                   | group                   | np                         |                    | 0.0178             | HIF1A                |                     |
| Type I BMP receptor   | group                   | np                         |                    | 0.0178             | NGF                  |                     |
| IRAK1/4               | group                   | np                         |                    | 0.0178             | IL1B                 |                     |
| Ces1b/Ces1c           | enzyme                  | np                         |                    | 0.0178             | GHR                  |                     |
| NUDT6                 | growth factor           | np                         |                    | 0.0178             | FGF2                 |                     |
| TCHP                  | other                   | np                         |                    | 0.0178             | VEGFA                |                     |
| PI4K2A                | kinase                  | np                         |                    | 0.0178             | HIF1A                |                     |
| LECT1                 | other                   | np                         |                    | 0.0178             | VEGFA                |                     |
| Il1bos                | other                   | np                         |                    | 0.0178             | IL1B                 |                     |
| PELI3                 | enzyme                  | np                         |                    | 0.0178             | IL1B                 |                     |
| Integrin alpha V beta | complex                 | np                         |                    | 0.0178             | MMP1                 |                     |
| TFAP2E                | transcription regulator | np                         |                    | 0.0178             | ITGA10               |                     |
| BPI                   | transporter             | np                         |                    | 0.0178             | ICAM1                |                     |
| VRK2                  | kinase                  | np                         |                    | 0.0178             | PTGS2                |                     |
| Ptk                   | group                   | np                         |                    | 0.0178             | IL6                  |                     |
| Adaptor protein 1     | complex                 | np                         |                    | 0.0178             | CD44                 |                     |
| API5                  | other                   | np                         |                    | 0.0178             | FGF2                 |                     |
| PARP14                | other                   | np                         |                    | 0.0178             | F3                   |                     |
| TRIB2                 | kinase                  | np                         |                    | 0.0178             | CEBPB                |                     |
| MARCH6                | enzyme                  | np                         |                    | 0.0178             | DIO2                 |                     |



| Upstream Regulator | Molecule Type              | Predicted Activation State | Activation z-score | p-value of overlap | Target Molecules | Mechanistic Network |
|--------------------|----------------------------|----------------------------|--------------------|--------------------|------------------|---------------------|
| ADGRG1             | g-protein coupled receptor | np                         |                    | 0.0178             | VEGFA            |                     |
| HLA-DR             | complex                    | np                         |                    | 0.0178             | IL1B             |                     |
| MYADM              | other                      | np                         |                    | 0.0178             | ICAM1            |                     |
| DUOX1              | enzyme                     | np                         |                    | 0.0178             | CXCL8            |                     |
| RPS6KA             | group                      | np                         |                    | 0.0178             | CXCL8            |                     |
| CP                 | enzyme                     | np                         |                    | 0.0178             | SLC40A1          |                     |
| PLXND1             | transmembrane receptor     | np                         |                    | 0.0178             | VEGFA            |                     |
| DSC2               | other                      | np                         |                    | 0.0178             | CD44             |                     |
| CPEB2              | translation regulator      | np                         |                    | 0.0178             | TWIST1           |                     |
| AFAP1L2            | other                      | np                         |                    | 0.0178             | CXCL8            |                     |
| Mucin              | group                      | np                         |                    | 0.0178             | PTGS2            |                     |
| PARD3              | other                      | np                         |                    | 0.0178             | IL6              |                     |
| MYO1C              | other                      | np                         |                    | 0.0178             | GSN              |                     |
| ACBD3              | other                      | np                         |                    | 0.0178             | SLC11A2          |                     |
| PDGFD              | growth factor              | np                         |                    | 0.0178             | VEGFA            |                     |
| SERPINC1           | enzyme                     | np                         |                    | 0.0178             | NOS2             |                     |
| MMP10              | peptidase                  | np                         |                    | 0.0178             | CXCL2            |                     |
| CNGA2              | ion channel                | np                         |                    | 0.0178             | CYP26B1          |                     |
| PAG1               | other                      | np                         |                    | 0.0178             | FYN              |                     |
| RAB27A             | enzyme                     | np                         |                    | 0.0178             | CD44             |                     |
| MED7               | transcription regulator    | np                         |                    | 0.0178             | TNFAIP3          |                     |
| SLC52A1            | other                      | np                         |                    | 0.0178             | ICAM1            |                     |
| TRIM16             | transcription regulator    | np                         |                    | 0.0178             | RARB             |                     |
| KSR2               | kinase                     | np                         |                    | 0.0178             | CXCL8            |                     |
| HMGCR              | enzyme                     | np                         |                    | 0.0178             | IL1B             |                     |
| TSTA3              | enzyme                     | np                         |                    | 0.0178             | ACTA2            |                     |
| mir-338            | microna                    | np                         |                    | 0.0178             | HIF1A            |                     |
| mir-622            | microna                    | np                         |                    | 0.0178             | HIF1A            |                     |

| Upstream Regulator                           | Molecule Type           | Predicted Activation State | Activation z-score | p-value of overlap | Target Molecules | Mechanistic Network |
|----------------------------------------------|-------------------------|----------------------------|--------------------|--------------------|------------------|---------------------|
| miR-18a-5p (and other miRNAs w/seed AAGGUGC) | mature microRNA         | np                         |                    | 0.0178             | THBS1            |                     |
| mir-580                                      | microRNA                | np                         |                    | 0.0178             | TWIST1           |                     |
| TOPORS                                       | enzyme                  | np                         |                    | 0.0178             | NKX3-1           |                     |
| AQUAPORIN                                    | group                   | np                         |                    | 0.0178             | IL1B             |                     |
| PUS1                                         | enzyme                  | np                         |                    | 0.0178             | RARB             |                     |
| PBK                                          | kinase                  | np                         |                    | 0.0178             | BIRC3            |                     |
| GBP1                                         | enzyme                  | np                         |                    | 0.0178             | MMP1             |                     |
| CALM1 (includes others)                      | other                   | np                         |                    | 0.0178             | TNFAIP3          |                     |
| SIGLEC7                                      | transmembrane receptor  | np                         |                    | 0.0178             | PTGS2            |                     |
| SIGLEC9                                      | other                   | np                         |                    | 0.0178             | PTGS2            |                     |
| CKAP4                                        | other                   | np                         |                    | 0.0178             | CTGF             |                     |
| EFEMP1                                       | enzyme                  | np                         |                    | 0.0178             | VEGFA            |                     |
| TNPO2                                        | transporter             | np                         |                    | 0.0178             | CXCL8            |                     |
| TPSD1                                        | peptidase               | np                         |                    | 0.0178             | CXCL8            |                     |
| PRKAB1                                       | kinase                  | np                         |                    | 0.0178             | NOS2             |                     |
| ACSL4                                        | enzyme                  | np                         |                    | 0.0178             | PTGS2            |                     |
| S100A1                                       | other                   | np                         |                    | 0.0178             | TUBA1A           |                     |
| GRAMD4                                       | other                   | np                         |                    | 0.0178             | IL6              |                     |
| UBE2D1                                       | enzyme                  | np                         |                    | 0.0178             | PTGS2            |                     |
| MT-ND2                                       | enzyme                  | np                         |                    | 0.0178             | HIF1A            |                     |
| CRADD                                        | other                   | np                         |                    | 0.0178             | IL6              |                     |
| MAP3K10                                      | kinase                  | np                         |                    | 0.0178             | CXCL8            |                     |
| TFF1                                         | other                   | np                         |                    | 0.0178             | PTGS2            |                     |
| MED21                                        | transcription regulator | np                         |                    | 0.0178             | TNFAIP3          |                     |
| Pla2g2a                                      | other                   | np                         |                    | 0.0178             | PTGS2            |                     |
| PDPN                                         | other                   | np                         |                    | 0.0178             | CD44             |                     |
| ITSN1                                        | other                   | np                         |                    | 0.0178             | NOS2             |                     |
| THEM4                                        | enzyme                  | np                         |                    | 0.0178             | PTGS2            |                     |

| Upstream Regulator                | Molecule Type              | Predicted Activation State | Activation z-score | p-value of overlap | Target Molecules          | Mechanistic Network |
|-----------------------------------|----------------------------|----------------------------|--------------------|--------------------|---------------------------|---------------------|
| ARHGDIB                           | enzyme                     | np                         |                    | 0.0178             | PTGS2                     |                     |
| MED17                             | transcription regulator    | np                         |                    | 0.0178             | RARB                      |                     |
| RXFP1                             | g-protein coupled receptor | np                         |                    | 0.0178             | ACTA2                     |                     |
| OPN4                              | g-protein coupled receptor | np                         |                    | 0.0178             | VEGFA                     |                     |
| PRC1                              | other                      | np                         |                    | 0.0178             | PTGS2                     |                     |
| FXVD5                             | ion channel                | np                         |                    | 0.0178             | CCL2                      |                     |
| ADCY3                             | enzyme                     | np                         |                    | 0.0178             | NRP1                      |                     |
| SRRM1                             | other                      | np                         |                    | 0.0178             | CD44                      |                     |
| Flt1                              | kinase                     | np                         |                    | 0.0178             | ATF3                      |                     |
| Marcks                            | other                      | np                         |                    | 0.0178             | IL6                       |                     |
| Naip1 (includes others)           | other                      | np                         |                    | 0.0178             | NOS2                      |                     |
| NLRP1                             | other                      | np                         |                    | 0.0178             | IL1B                      |                     |
| PRR13                             | other                      | np                         |                    | 0.0178             | THBS1                     |                     |
| GBA                               | enzyme                     | np                         |                    | 0.0178             | IL6                       |                     |
| Ifnz (includes)                   | cytokine                   | np                         |                    | 0.0178             | IRF1                      |                     |
| ISCU                              | other                      | np                         |                    | 0.0178             | FTH1                      |                     |
| Immunoglobulin Lambda Light Chain | group                      | np                         |                    | 0.0178             | CCL2                      |                     |
| Ifnar                             | group                      | np                         | 1.406              | 0.0178             | CCL2,FCER1G,IL1B,IL6,IRF1 |                     |
| VGLL3                             | other                      | np                         |                    | 0.0185             | COL12A1,THBS1             |                     |
| PPP2CA                            | phosphatase                | np                         |                    | 0.0185             | IRF1,NOS2                 |                     |
| LRAT                              | enzyme                     | np                         |                    | 0.0185             | PDK4,RARB                 |                     |
| TICAM2                            | other                      | np                         |                    | 0.0185             | CTSK,IL6                  |                     |
| GHRHR                             | g-protein coupled receptor | np                         |                    | 0.0185             | HSD11B1,IL1B              |                     |
| PRAME                             | other                      | np                         |                    | 0.0185             | CYP26B1,RARB              |                     |
| SPHK2                             | kinase                     | np                         |                    | 0.0185             | FYN,IL6                   |                     |
| VAV1                              | transcription regulator    | np                         |                    | 0.0185             | IL6,PTGS2                 |                     |
| DKK1                              | growth factor              | np                         |                    | 0.0185             | BMP4,CD44                 |                     |

| Upstream Regulator | Molecule Type              | Predicted Activation State | Activation z-score | p-value of overlap | Target Molecules                                                                     | Mechanistic Network |
|--------------------|----------------------------|----------------------------|--------------------|--------------------|--------------------------------------------------------------------------------------|---------------------|
| DPP4               | peptidase                  | np                         |                    | 0.0185             | FGF2,IL1RN                                                                           |                     |
| RPS6KA5            | kinase                     | np                         |                    | 0.0185             | IL6,PTGS2                                                                            |                     |
| GABBR1             | g-protein coupled receptor | np                         |                    | 0.0185             | BMP2,IL6                                                                             |                     |
| PRKD1              | kinase                     | np                         |                    | 0.0185             | MMP1,PTGS2                                                                           |                     |
| FOXF2              | transcription regulator    | np                         |                    | 0.0185             | ACTA2,TAGLN                                                                          |                     |
| IL1RL1             | transmembrane receptor     | np                         |                    | 0.0185             | CXCL8,IL6                                                                            |                     |
| FGF9               | growth factor              | np                         |                    | 0.0185             | BMP4,VEGFA                                                                           |                     |
| DUSP14             | phosphatase                | np                         |                    | 0.0185             | NFKBIZ,PLAT                                                                          |                     |
| TFEB               | transcription regulator    | np                         |                    | 0.0189             | CTSK,IL1B,IL6                                                                        |                     |
| TBP                | transcription regulator    | np                         |                    | 0.0189             | IER3,NFKBIA,TNFAIP3                                                                  |                     |
| ITGB3              | transmembrane receptor     | np                         |                    | 0.0189             | MMP1,PTGS2,TGFBR2                                                                    |                     |
| KLF5               | transcription regulator    | np                         |                    | 0.0189             | ACTA2,HIF1A,TAGLN                                                                    |                     |
| Esrra              | transcription regulator    | np                         |                    | 0.0195             | CH25H,GALM,IL6,PK4,PTGS2                                                             |                     |
| HIPK2              | kinase                     | np                         | 0                  | 0.0197             | CIDEA,MMP10,SLC25A37,VEGFA                                                           |                     |
| E2F1               | transcription regulator    | np                         |                    | 0.0203             | BMP4,CITED2,HIST2H2AA3/HIST2H2AA4,ID3,KIAA0101,MEIS1,NRP1,PK4, SERPINE1,STK17B,THBS1 |                     |
| SBDS               | other                      | np                         |                    | 0.0204             | AKR1C3,CTGF,FBXO32,MAFF,MT2A                                                         |                     |
| GATA3              | transcription regulator    | np                         | 0.728              | 0.0205             | C10orf54,EBF1,IL24,IL6,NKX3-1,RGCC,S100A9                                            |                     |
| CASP8              | peptidase                  | np                         |                    | 0.0205             | CD44,IL1B,IL6                                                                        |                     |
| HNF1A              | transcription regulator    | np                         | -0.816             | 0.0212             | CDO1,ELF3,HOPX,PAMR1,PRLR,RARB,SERPINA1,SLC40A1,SLC7A2,VN N3                         |                     |
| SMARCB1            | transcription regulator    | np                         | -0.152             | 0.0213             | ACSL1,CD44,GSN,LBP,PPP1R3C                                                           |                     |
| Ctbp               | group                      | np                         |                    | 0.0216             | CTSK,PLAUR                                                                           |                     |
| LGR4               | transmembrane receptor     | np                         |                    | 0.0216             | IL1B,IL6                                                                             |                     |
| PLP1               | other                      | np                         |                    | 0.0216             | CCL20,CXCL2                                                                          |                     |
| STAP2              | other                      | np                         |                    | 0.0216             | CXCL2,IL6                                                                            |                     |

| Upstream Regulator                           | Molecule Type           | Predicted Activation State | Activation z-score | p-value of overlap | Target Molecules                          | Mechanistic Network |
|----------------------------------------------|-------------------------|----------------------------|--------------------|--------------------|-------------------------------------------|---------------------|
| FGFR4                                        | kinase                  | np                         |                    | 0.0216             | CD44,MMP13                                |                     |
| GAS6                                         | growth factor           | np                         |                    | 0.0216             | IL6,SOCS1                                 |                     |
| ITGA5                                        | transmembrane receptor  | np                         |                    | 0.0216             | CEBPB,NOS2                                |                     |
| ROCK1                                        | kinase                  | np                         |                    | 0.0216             | CD44,ICAM1                                |                     |
| mir-218                                      | microna                 | np                         |                    | 0.0216             | FZD4,ZEB2                                 |                     |
| miR-30c-5p (and other miRNAs w/seed GUAAACA) | mature microrna         | np                         |                    | 0.0216             | CTGF,IL6                                  |                     |
| CCL21                                        | cytokine                | np                         |                    | 0.0216             | CCL2,CXCL8                                |                     |
| IGFBP5                                       | other                   | np                         |                    | 0.0216             | F3,SERPINE1                               |                     |
| STK3                                         | kinase                  | np                         |                    | 0.0216             | CTGF,IL6                                  |                     |
| SFTPD                                        | other                   | np                         |                    | 0.0216             | IL1B,MMP1                                 |                     |
| ITIH1                                        | other                   | np                         |                    | 0.0216             | NOS2,TNFAIP6                              |                     |
| NBEAL2                                       | other                   | np                         |                    | 0.0216             | CXCL2,THBS1                               |                     |
| HDC                                          | enzyme                  | np                         |                    | 0.0216             | IL6,PTGS2                                 |                     |
| CGA                                          | other                   | np                         |                    | 0.0216             | BIRC3,PTGS2                               |                     |
| ILK                                          | kinase                  | np                         |                    | 0.0216             | IL6,NOS2                                  |                     |
| IL37                                         | cytokine                | np                         |                    | 0.0216             | IL1B,IL6                                  |                     |
| MKL1                                         | transcription regulator | np                         | -1.432             | 0.022              | ACTA2,CXCL6,G0S2,MGST2,S100A9,TAGLN       |                     |
| HOXD10                                       | transcription regulator | np                         | 0                  | 0.022              | CD44,ICAM1,PDZK1IP1,SERPINE1              |                     |
| mir-29                                       | microna                 | np                         |                    | 0.0222             | CCL8,ITGA11,PMP22                         |                     |
| FOXO4                                        | transcription regulator | np                         |                    | 0.0222             | CTGF,IER3,NAMPT                           |                     |
| Interferon alpha                             | group                   | np                         | 0.519              | 0.0225             | AUTS2,IFIT1,IRF1,NOS2,RARRES3,SOCS1,STAT4 |                     |
| TCF3                                         | transcription regulator | np                         |                    | 0.0232             | ATF3,CD79B,HSD17B14,IL7R,ZC3H12A          |                     |
| PPARGC1B                                     | transcription regulator | np                         |                    | 0.024              | HK2,PDK4,VEGFA                            |                     |
| TBX21                                        | transcription regulator | np                         |                    | 0.024              | PRDM1,STAT4,TGFBR2                        |                     |
| CSF3                                         | cytokine                | np                         | 1.131              | 0.0245             | BIRC3,CEBPB,IL6,TNFRSF1B                  |                     |

| Upstream Regulator                 | Molecule Type                     | Predicted Activation State | Activation z-score | p-value of overlap | Target Molecules                              | Mechanistic Network |
|------------------------------------|-----------------------------------|----------------------------|--------------------|--------------------|-----------------------------------------------|---------------------|
| TMSB4                              | group                             | np                         |                    | 0.0249             | BMP2,BMP4                                     |                     |
| MTDH                               | transcription regulator           | np                         |                    | 0.0249             | RARB,TWIST1                                   |                     |
| SCAVENGER receptor CLASS A         | group                             | np                         |                    | 0.0249             | CXCL8,IL6                                     |                     |
| SUMO1                              | enzyme                            | np                         |                    | 0.0249             | IL6,NOS2                                      |                     |
| miR-296-5p (miRNAs w/seed GGGCCCC) | mature microRNA                   | np                         |                    | 0.0249             | MMP1,VEGFA                                    |                     |
| NFIX                               | transcription regulator           | np                         |                    | 0.0249             | CXCL8,SERPINE1                                |                     |
| GNA12                              | enzyme                            | np                         |                    | 0.0249             | ACTA2,TAGLN                                   |                     |
| PIM2                               | kinase                            | np                         |                    | 0.0249             | SOCS1,STAT4                                   |                     |
| SLC16A2                            | transporter                       | np                         |                    | 0.0249             | SLC7A5,SLCO3A1                                |                     |
| PAK1                               | kinase                            | np                         |                    | 0.0249             | F3,VEGFA                                      |                     |
| DDX5                               | enzyme                            | np                         |                    | 0.0249             | NET1,S100A4                                   |                     |
| RGS1                               | other                             | np                         |                    | 0.0249             | CITED2,CXCL2                                  |                     |
| LHCGR                              | g-protein coupled receptor        | np                         |                    | 0.0258             | PRLR,PTGS2,TNFAIP6                            |                     |
| EGR2                               | transcription regulator           | np                         |                    | 0.0258             | IL1B,PRDM1,RRAD                               |                     |
| GNB1                               | enzyme                            | np                         |                    | 0.0258             | IER3,IL1B,PRDM1                               |                     |
| FOXA1                              | transcription regulator           | np                         | -1.199             | 0.027              | ACTA2,BMP2,EFHD1,FNDC3B,IL6,TAGLN             |                     |
| Sos                                | group                             | np                         |                    | 0.0271             | AKR1C3,CD44,ESM1,MMP10,NET1,PLD1,PTGS2,PTPN12 |                     |
| GNB2                               | enzyme                            | np                         |                    | 0.0277             | IER3,IL1B,PRDM1                               |                     |
| RARB                               | ligand-dependent nuclear receptor | np                         |                    | 0.0277             | IFIT1,RARB,VEGFA                              |                     |
| CLEC11A                            | growth factor                     | np                         |                    | 0.0277             | IL1B,PMP22,STAT4                              |                     |
| HSF2                               | transcription regulator           | np                         |                    | 0.0277             | HIF1A,HSPB1,IL1B                              |                     |
| KLF15                              | transcription regulator           | np                         |                    | 0.0277             | ACSL1,CTGF,PKD4                               |                     |

| Upstream Regulator | Molecule Type                     | Predicted Activation State | Activation z-score | p-value of overlap | Target Molecules                                     | Mechanistic Network |
|--------------------|-----------------------------------|----------------------------|--------------------|--------------------|------------------------------------------------------|---------------------|
| UCP1               | transporter                       | np                         | -0.816             | 0.0279             | FBXO32,GPX3,GSTM1,SHMT1,SLC6A9,SMS                   |                     |
| Rock               | group                             | np                         |                    | 0.0284             | COL3A1,CTGF                                          |                     |
| AGPAT2             | enzyme                            | np                         |                    | 0.0284             | ACSL1,CEBPB                                          |                     |
| IL23               | complex                           | np                         |                    | 0.0284             | CCL20,IL26                                           |                     |
| CFB                | peptidase                         | np                         |                    | 0.0284             | C5AR1,CXCL2                                          |                     |
| SOD2               | enzyme                            | np                         |                    | 0.0284             | IL1B,MMP13                                           |                     |
| EHHADH             | enzyme                            | np                         |                    | 0.0284             | ACSL1,PDK4                                           |                     |
| SPTLC2             | enzyme                            | np                         |                    | 0.0284             | CTGF,THBS1                                           |                     |
| SMARCD3            | transcription regulator           | np                         |                    | 0.0284             | ACAN,CD44                                            |                     |
| MAPK12             | kinase                            | np                         |                    | 0.0284             | IL1B,MAP3K8                                          |                     |
| ICOSLG/LOC10272399 | other                             | np                         |                    | 0.0284             | IL1B,IL6                                             |                     |
| ADRB3              | g-protein coupled receptor        | np                         |                    | 0.0284             | IL1B,IL6                                             |                     |
| RETN               | other                             | np                         |                    | 0.0284             | CCL2,IL6                                             |                     |
| ITGB6              | other                             | np                         |                    | 0.0284             | COL3A1,SERPINE1                                      |                     |
| FABP5              | transporter                       | np                         |                    | 0.0284             | CXCL8,VEGFA                                          |                     |
| FOSB               | transcription regulator           | np                         |                    | 0.0284             | CEBPB,FTH1                                           |                     |
| ACTB               | other                             | np                         |                    | 0.0284             | DSTN,LIMK2                                           |                     |
| KLRC4-KLRK1/KLRK1  | transmembrane receptor            | np                         |                    | 0.0284             | CD44,VEGFA                                           |                     |
| TRIM24             | transcription regulator           | np                         | -1.091             | 0.0284             | IRF1,JAK2,KIAA0101,SOCS1,VEGFA                       |                     |
| Ige                | complex                           | np                         |                    | 0.0297             | CXCL2,IL1B,IL6                                       |                     |
| RUNX1              | transcription regulator           | np                         |                    | 0.0307             | FSCN1,IL7R,MMP13,RGCC,SLC22A4                        |                     |
| RXRA               | ligand-dependent nuclear receptor | np                         | 0.152              | 0.0308             | ABCC3,ALDH1A2,CCL20,CDO1,HIF1A,RARB                  |                     |
| MAPT               | other                             | Activated                  | 2                  | 0.0318             | DSTN,FYN,GPM6B,HIST1H2BD,IL1B,IL6,NOS2,TUBA1A,TUBB2B |                     |
| HOXA10             | transcription regulator           | np                         | 1.342              | 0.0319             | ALDH1A2,GAS6,MINOS1-NBL1/NBL1,NDRG2,TGFBR3           |                     |
| HCAR2              | g-protein coupled receptor        | np                         |                    | 0.0321             | IL1B,IL6                                             |                     |

| Upstream Regulator     | Molecule Type              | Predicted Activation State | Activation z-score | p-value of overlap | Target Molecules     | Mechanistic Network |
|------------------------|----------------------------|----------------------------|--------------------|--------------------|----------------------|---------------------|
| GLIS2                  | transcription regulator    | np                         |                    | 0.0321             | CTGF,SERPINE1        |                     |
| CYP2E1                 | enzyme                     | np                         |                    | 0.0321             | C5AR1,IL6            |                     |
| STK4                   | kinase                     | np                         |                    | 0.0321             | IL6,IL7R             |                     |
| BSG                    | transporter                | np                         |                    | 0.0321             | CXCL8,MMP1           |                     |
| WNT4                   | cytokine                   | np                         |                    | 0.0321             | BMP2,PTGS2           |                     |
| T                      | transcription regulator    | np                         |                    | 0.0321             | ACAN,CD44            |                     |
| TYROBP                 | transmembrane receptor     | np                         |                    | 0.0321             | IL1B,IL6             |                     |
| FLT3                   | kinase                     | np                         |                    | 0.0321             | CEBPB,IL6            |                     |
| SHH                    | peptidase                  | np                         |                    | 0.0329             | BMP2,BMP4,DLX5,PGF   |                     |
| PCGEM1                 | other                      | np                         |                    | 0.0339             | HK2,IDH1,PDK4        |                     |
| ELAVL1                 | other                      | np                         |                    | 0.0345             | ATF3,NOS2,PTGS2,SAT1 |                     |
| ARHGEF12               | other                      | np                         |                    | 0.0352             | ACTA2                |                     |
| ITPR                   | group                      | np                         |                    | 0.0352             | IL1B                 |                     |
| tyrosine kinase        | group                      | np                         |                    | 0.0352             | CD44                 |                     |
| Bvr                    | group                      | np                         |                    | 0.0352             | NOS2                 |                     |
| Erm                    | group                      | np                         |                    | 0.0352             | ICAM1                |                     |
| NIK                    | group                      | np                         |                    | 0.0352             | IL6                  |                     |
| T-type Calcium Channel | complex                    | np                         |                    | 0.0352             | ENPP1                |                     |
| MBNL3                  | other                      | np                         |                    | 0.0352             | CD44                 |                     |
| Smr3b/Vcsa2            | other                      | np                         |                    | 0.0352             | HIF1A                |                     |
| DGKE                   | kinase                     | np                         |                    | 0.0352             | ICAM1                |                     |
| ZMIZ1                  | other                      | np                         |                    | 0.0352             | SERPINE1             |                     |
| MRAP                   | other                      | np                         |                    | 0.0352             | MRAP2                |                     |
| POPDC2                 | other                      | np                         |                    | 0.0352             | IL1B                 |                     |
| LPAR5                  | g-protein coupled receptor | np                         |                    | 0.0352             | PTGS2                |                     |
| PIP5K1A                | kinase                     | np                         |                    | 0.0352             | CXCL8                |                     |
| NOX5                   | ion channel                | np                         |                    | 0.0352             | PTGS2                |                     |
| ENTPD2                 | enzyme                     | np                         |                    | 0.0352             | SERPINE1             |                     |
| TOX4                   | other                      | np                         |                    | 0.0352             | TWIST1               |                     |



| Upstream Regulator | Molecule Type              | Predicted Activation State | Activation z-score | p-value of overlap | Target Molecules | Mechanistic Network |
|--------------------|----------------------------|----------------------------|--------------------|--------------------|------------------|---------------------|
| SEMA4A             | other                      | np                         |                    | 0.0352             | VEGFA            |                     |
| SLC22A3            | transporter                | np                         |                    | 0.0352             | IL6              |                     |
| LGR5               | transmembrane receptor     | np                         |                    | 0.0352             | AKR1C3           |                     |
| ESRP2              | other                      | np                         |                    | 0.0352             | ZEB2             |                     |
| ZDHHC2             | enzyme                     | np                         |                    | 0.0352             | CD9              |                     |
| HSD17B14           | enzyme                     | np                         |                    | 0.0352             | IL6              |                     |
| SEN5               | peptidase                  | np                         |                    | 0.0352             | CXCL8            |                     |
| CYSLTR2            | g-protein coupled receptor | np                         |                    | 0.0352             | CXCL8            |                     |
| GPBAR1             | g-protein coupled receptor | np                         |                    | 0.0352             | DIO2             |                     |
| Mi2                | group                      | np                         |                    | 0.0352             | CTSK             |                     |
| Vla-4              | complex                    | np                         |                    | 0.0352             | F3               |                     |
| RYR3               | ion channel                | np                         |                    | 0.0352             | ATF3             |                     |
| Sfk                | group                      | np                         |                    | 0.0352             | PRLR             |                     |
| JDP2               | transcription regulator    | np                         |                    | 0.0352             | CTSK             |                     |
| RRM2               | enzyme                     | np                         |                    | 0.0352             | THBS1            |                     |
| Atf                | group                      | np                         |                    | 0.0352             | PTGS2            |                     |
| PDE6B              | enzyme                     | np                         |                    | 0.0352             | RIPK3            |                     |
| ACTC1              | enzyme                     | np                         |                    | 0.0352             | ACTA2            |                     |
| GLRX               | enzyme                     | np                         |                    | 0.0352             | CXCL2            |                     |
| AHSG               | other                      | np                         |                    | 0.0352             | IL6              |                     |
| CCL1               | cytokine                   | np                         |                    | 0.0352             | SERPINE1         |                     |
| HAMP               | other                      | np                         |                    | 0.0352             | SLC40A1          |                     |
| ABCC2              | transporter                | np                         |                    | 0.0352             | ABCC3            |                     |
| SP100              | transcription regulator    | np                         |                    | 0.0352             | MMP1             |                     |
| UBA1               | enzyme                     | np                         |                    | 0.0352             | BIRC3            |                     |
| AKAP10             | other                      | np                         |                    | 0.0352             | IL6              |                     |
| CCL18              | cytokine                   | np                         |                    | 0.0352             | S100A4           |                     |
| BCAP31             | transporter                | np                         |                    | 0.0352             | CD9              |                     |
| EAF2               | transcription regulator    | np                         |                    | 0.0352             | HIF1A            |                     |
| mir-379            | microRNA                   | np                         |                    | 0.0352             | HIF1A            |                     |

| Upstream Regulator                              | Molecule Type              | Predicted Activation State | Activation z-score | p-value of overlap | Target Molecules | Mechanistic Network |
|-------------------------------------------------|----------------------------|----------------------------|--------------------|--------------------|------------------|---------------------|
| miR-23a-3p<br>(and other miRNAs w/seed UCACAUU) | mature microRNA            | np                         |                    | 0.0352             | FBXO32           |                     |
| HPX                                             | transporter                | np                         |                    | 0.0352             | IL6              |                     |
| IGK                                             | other                      | np                         |                    | 0.0352             | CCL2             |                     |
| NUBP1                                           | other                      | np                         |                    | 0.0352             | FTH1             |                     |
| ABHD5                                           | enzyme                     | np                         |                    | 0.0352             | PDK4             |                     |
| HBP1                                            | transcription regulator    | np                         |                    | 0.0352             | PTGS2            |                     |
| CD19                                            | transmembrane receptor     | np                         |                    | 0.0352             | IL6              |                     |
| SEPT9                                           | enzyme                     | np                         |                    | 0.0352             | HIF1A            |                     |
| SDC4                                            | other                      | np                         |                    | 0.0352             | IL1B             |                     |
| LGALS7/LGALS7B                                  | other                      | np                         |                    | 0.0352             | SERPINE1         |                     |
| TRIM63                                          | enzyme                     | np                         |                    | 0.0352             | FBXO32           |                     |
| IL1RAPL1                                        | transmembrane receptor     | np                         |                    | 0.0352             | IL6              |                     |
| SART1                                           | other                      | np                         |                    | 0.0352             | VEGFA            |                     |
| ACKR1                                           | g-protein coupled receptor | np                         |                    | 0.0352             | CCL2             |                     |
| HOXD4                                           | transcription regulator    | np                         |                    | 0.0352             | RARB             |                     |
| PFN1                                            | other                      | np                         |                    | 0.0352             | NOS2             |                     |
| P2RX4                                           | ion channel                | np                         |                    | 0.0352             | IL1B             |                     |
| NPPC                                            | other                      | np                         |                    | 0.0352             | NOS2             |                     |
| ZNF410                                          | other                      | np                         |                    | 0.0352             | MMP1             |                     |
| IFNE                                            | cytokine                   | np                         |                    | 0.0352             | RARRES3          |                     |
| SH2D3C                                          | other                      | np                         |                    | 0.0352             | IL6              |                     |
| PROK1                                           | growth factor              | np                         |                    | 0.0352             | CXCL8            |                     |
| EFNB1                                           | other                      | np                         |                    | 0.0352             | IL7R             |                     |
| HOXB4                                           | transcription regulator    | np                         |                    | 0.0352             | RARB             |                     |
| CFH                                             | other                      | np                         |                    | 0.0352             | CXCL2            |                     |
| TEK                                             | kinase                     | np                         |                    | 0.0352             | VEGFA            |                     |

| Upstream Regulator | Molecule Type              | Predicted Activation State | Activation z-score | p-value of overlap | Target Molecules                        | Mechanistic Network |
|--------------------|----------------------------|----------------------------|--------------------|--------------------|-----------------------------------------|---------------------|
| HOXB7              | transcription regulator    | np                         |                    | 0.0352             | FGF2                                    |                     |
| IL22RA1            | transmembrane receptor     | np                         |                    | 0.0352             | CCL20                                   |                     |
| DVL3               | other                      | np                         |                    | 0.0352             | MMP13                                   |                     |
| CIAPIN1            | other                      | np                         |                    | 0.0352             | JAK2                                    |                     |
| CFL1               | other                      | np                         |                    | 0.0352             | DSTN                                    |                     |
| GPX4               | enzyme                     | np                         |                    | 0.0352             | MMP1                                    |                     |
| COL11A1            | other                      | np                         |                    | 0.0352             | MMP13                                   |                     |
| CSTB               | peptidase                  | np                         |                    | 0.0352             | IL1B                                    |                     |
| CASP10             | peptidase                  | np                         |                    | 0.0352             | IL6                                     |                     |
| DIABLO             | other                      | np                         |                    | 0.0352             | BIRC3                                   |                     |
| Mt3                | other                      | np                         |                    | 0.0352             | MT2A                                    |                     |
| CDK11B             | kinase                     | np                         |                    | 0.0352             | VEGFA                                   |                     |
| Col17a1            | other                      | np                         |                    | 0.0352             | SERPINA1                                |                     |
| HMGA2              | enzyme                     | np                         |                    | 0.0352             | TWIST1                                  |                     |
| LNPEP              | peptidase                  | np                         |                    | 0.0352             | NOS2                                    |                     |
| EXOC7              | transporter                | np                         |                    | 0.0352             | ZEB2                                    |                     |
| SH3GLB2            | other                      | np                         |                    | 0.0352             | PTGS2                                   |                     |
| EMD                | other                      | np                         |                    | 0.0352             | IER3                                    |                     |
| SIAH1              | enzyme                     | np                         |                    | 0.0352             | HIF1A                                   |                     |
| ZFYVE16            | transporter                | np                         |                    | 0.0352             | SERPINE1                                |                     |
| FTL                | enzyme                     | np                         |                    | 0.0352             | FTH1                                    |                     |
| SPARC              | other                      | np                         | -1.387             | 0.0356             | ABCC4,AKR1C3,IL6,SERPINE1,SLC7A11       |                     |
| CLOCK              | transcription regulator    | np                         |                    | 0.036              | ACSL4,DNAJB9,ICAM1,PDGFRB,PIGA,TNFRSF21 |                     |
| ZC3H14             | other                      | np                         |                    | 0.036              | CITED2,PLAT                             |                     |
| AGTR2              | g-protein coupled receptor | np                         |                    | 0.036              | COL3A1,NOS2                             |                     |
| PTPN2              | phosphatase                | np                         |                    | 0.036              | CIDEA,NOS2                              |                     |
| MYT1               | transcription regulator    | np                         |                    | 0.036              | ARHGDIB,GLT8D2                          |                     |
| CD80               | transmembrane receptor     | np                         |                    | 0.036              | IL1B,IL6                                |                     |
| IGFBP3             | other                      | np                         |                    | 0.036              | ICAM1,IL1B                              |                     |
| CSF1R              | kinase                     | np                         |                    | 0.036              | IL6,NOS2                                |                     |
| TNK1               | kinase                     | np                         |                    | 0.036              | IL6,NOS2                                |                     |

| Upstream Regulator | Molecule Type           | Predicted Activation State | Activation z-score | p-value of overlap | Target Molecules           | Mechanistic Network |
|--------------------|-------------------------|----------------------------|--------------------|--------------------|----------------------------|---------------------|
| ACSL5              | enzyme                  | np                         |                    | 0.036              | ANOS1,GFPT2                |                     |
| BMPR1B             | kinase                  | np                         |                    | 0.036              | ID3,PTGS2                  |                     |
| NLRC5              | transcription regulator | np                         |                    | 0.036              | IL1B,IL6                   |                     |
| IL15RA             | transmembrane receptor  | np                         |                    | 0.036              | CD44,IL6                   |                     |
| STAT2              | transcription regulator | np                         |                    | 0.0361             | IL6,IRF1,SOCS1             |                     |
| RAC2               | enzyme                  | np                         |                    | 0.0361             | IL1B,PMP22,STAT4           |                     |
| STAT5B             | transcription regulator | np                         | 0                  | 0.0382             | AHNAK,BIRC3,EBF1,IL24,PRLR |                     |
| EFNA5              | kinase                  | np                         |                    | 0.0384             | CTGF,IRF1,PLAT             |                     |
| DDIT3              | transcription regulator | np                         |                    | 0.0384             | ATF3,IL6,IRAK2             |                     |
| EFNA4              | kinase                  | np                         |                    | 0.0384             | CTGF,IRF1,PLAT             |                     |
| EFNA3              | kinase                  | np                         |                    | 0.0384             | CTGF,IRF1,PLAT             |                     |
| BCL11B             | transcription regulator | np                         |                    | 0.0384             | CXCL8,IL7R,MAP3K8          |                     |
| EBF2               | transcription regulator | np                         |                    | 0.04               | SFRP4,SHISA3               |                     |
| BMPR2              | kinase                  | np                         |                    | 0.04               | CXCL8,SEMA3C               |                     |
| TNFRSF4            | transmembrane receptor  | np                         |                    | 0.04               | IL6,SOCS1                  |                     |
| TSLP               | cytokine                | np                         |                    | 0.04               | CXCL8,IL6                  |                     |
| CASP3              | peptidase               | np                         |                    | 0.04               | CTSK,NOS2                  |                     |
| CTSS               | peptidase               | np                         |                    | 0.04               | CTSK,IL1B                  |                     |
| PRKCZ              | kinase                  | np                         |                    | 0.04               | NFKBIA,VEGFA               |                     |
| UBE3A              | enzyme                  | np                         |                    | 0.04               | IL1B,SERPINE1              |                     |
| SIX1               | transcription regulator | np                         |                    | 0.04               | BMP4,DLX5                  |                     |
| PRLR               | transmembrane receptor  | np                         |                    | 0.04               | FGF2,GHR                   |                     |
| SST                | other                   | np                         |                    | 0.04               | GHR,PRLR                   |                     |
| NPC1               | transporter             | np                         |                    | 0.0408             | CTSK,PTGS2,STAT4           |                     |
| SMARCA2            | transcription regulator | np                         |                    | 0.0408             | CD44,MMP10,TAGLN           |                     |

| Upstream Regulator | Molecule Type                     | Predicted Activation State | Activation z-score | p-value of overlap | Target Molecules               | Mechanistic Network |
|--------------------|-----------------------------------|----------------------------|--------------------|--------------------|--------------------------------|---------------------|
| NR4A1              | ligand-dependent nuclear receptor | np                         |                    | 0.0409             | ACSL4,CIDEA,G0S2,IL6,SAT1      |                     |
| CFTR               | ion channel                       | np                         |                    | 0.0411             | NFKBIZ,NOS2,OSBPL1A,SAA1       |                     |
| NANOG              | transcription regulator           | np                         |                    | 0.0423             | CCDC85A,COL3A1,DLX5,HOPX,MEIS1 |                     |
| CTLA4              | transmembrane receptor            | np                         |                    | 0.0432             | CXCL8,PRDM1,SLC7A5             |                     |
| RHOJ               | enzyme                            | np                         |                    | 0.0442             | GSN,PLAT                       |                     |
| FCGR2B             | transmembrane receptor            | np                         |                    | 0.0442             | SOCS1,VEGFA                    |                     |
| HEY2               | transcription regulator           | np                         |                    | 0.0442             | IL6,SMTN                       |                     |
| MAT1A              | enzyme                            | np                         |                    | 0.0442             | GAMT,SAA1                      |                     |
| RAG2               | enzyme                            | np                         |                    | 0.0442             | IL1B,IL6                       |                     |
| SERPINA1           | other                             | np                         |                    | 0.0442             | CCL2,RGS16                     |                     |
| TRAIP              | enzyme                            | np                         |                    | 0.0442             | IL1B,IL6                       |                     |
| mir-193            | microna                           | np                         |                    | 0.0442             | SULF1,VEGFA                    |                     |
| IFI16              | transcription regulator           | np                         |                    | 0.0442             | CCL20,IL6                      |                     |
| NR2F2              | ligand-dependent nuclear receptor | np                         |                    | 0.0442             | ANGPT1,NRP1                    |                     |
| PML                | transcription regulator           | np                         | 0.849              | 0.0447             | ACSL4,HSPB1,IL1B,PK4           |                     |
| DGCR8              | enzyme                            | np                         |                    | 0.0457             | ACTA2,PMP22,TAGLN              |                     |
| IFN Beta           | group                             | np                         |                    | 0.0457             | IFIT1,IL24,SOCS1               |                     |
| AIRE               | transcription regulator           | np                         |                    | 0.0457             | BMP2,BMP4,S100A9               |                     |
| TBX5               | transcription regulator           | np                         |                    | 0.0457             | COL3A1,ECM2,S100A4             |                     |
| PTPN11             | phosphatase                       | np                         |                    | 0.0457             | ACSL4,IL6,PDGFRB               |                     |
| TCF12              | transcription regulator           | np                         |                    | 0.0457             | HSD17B14,IL7R,ZC3H12A          |                     |
| HOXA3              | transcription regulator           | np                         |                    | 0.0483             | CEBPB,EVI2A,TNFRSF1B           |                     |
| MBD3               | enzyme                            | np                         |                    | 0.0484             | CD44,FZD4,PRICKLE1,RHOU        |                     |

| Upstream Regulator | Molecule Type              | Predicted Activation State | Activation z-score | p-value of overlap | Target Molecules                   | Mechanistic Network |
|--------------------|----------------------------|----------------------------|--------------------|--------------------|------------------------------------|---------------------|
| TEAD4              | transcription regulator    | np                         |                    | 0.0485             | BMP4,HIF1A                         |                     |
| F2R                | g-protein coupled receptor | np                         |                    | 0.0485             | CTGF,CXCL8                         |                     |
| HAND1              | transcription regulator    | np                         |                    | 0.0485             | ANGPT1,NRP1                        |                     |
| RHOA               | enzyme                     | np                         |                    | 0.0485             | IL1B,SDC2                          |                     |
| SUZ12              | enzyme                     | np                         |                    | 0.0498             | FBXO32,LAMB3,RARB,SLC7A5,TNFRSF1B  |                     |
| IRF8               | transcription regulator    | np                         | 1.941              | 0.0503             | ICAM1,IL1B,IL6,LIF                 |                     |
| SATB1              | transcription regulator    | Inhibited                  | -2.425             | 0.062              | EVI2A,ID3,IL7R,KITLG,PTGS2,SIPA1L2 |                     |
