# Supplementary material
Source: PubMed Central journal article supplement (PMC5290940)
Supplement: 10.1074_M116.756601_jbc.M116.756601-4.pdf [file 10.1074_M116.756601_jbc.M116.756601-4.pdf]

# Supplementary Table 4

| <b>Gene</b>  | <b>Region</b>                              | <b>Sequence (5'-3')</b>                                                    |
|--------------|--------------------------------------------|----------------------------------------------------------------------------|
| <b>MMP13</b> | Proximal promoter/transcription start site | <b>For:</b><br>GAAAAAGTCGCCACGTAAGC<br><b>Rev:</b><br>CGACAATGAGTCCAGCTCAA |
|              | 3' untranslated region (UTR)               | <b>For:</b><br>TCGGCACAAAATACAGGTCA<br><b>Rev:</b><br>GCCTCCCCTTTTTAGACCAC |

| <b>Gene</b>  | <b>Sequence (5'-3')</b>                                                                | <b>Probe</b>                                        |
|--------------|----------------------------------------------------------------------------------------|-----------------------------------------------------|
| <b>18S</b>   | <b>For:</b> CGAATGGCTCATTAAATCAGTTATGG<br><b>Rev:</b><br>TATTAGCTCTAGAATTACCACAGTTATCC | FAM-<br>CAGAGAGTACAACCTTACATCGTGTTGC<br>GGCTC-TAMRA |
| <b>MMP13</b> | <b>For:</b> AAATTATGGAGGAGATGCCATT<br><b>Rev:</b> TCCTTGGAGTGGTCAAGACCTAA              | FAM-<br>CTACAACCTGTTTCTTGTTGCTGCGCAT<br>GA-TAMRA    |

| <b>Gene</b>  | <b>Sequence (5'-3')</b>                                                | <b>Universal Probe Library number</b> | <b>ON-TARGETplus™ SMARTpool siRNA</b> |
|--------------|------------------------------------------------------------------------|---------------------------------------|---------------------------------------|
| <b>ATF3</b>  | <b>For:</b> TTTGCCATCCAGAACAAGC<br><b>Rev:</b> CATCTTCTTCAGGGGCTACCT   | <b>53</b>                             | L-008663                              |
| <b>cFOS</b>  | ABi Assay on demand<br># Hs00170630_m1                                 | <b>N/A</b>                            | L-003265                              |
| <b>FOSB</b>  | <b>For:</b> TCTGTCTTCGGTGGACTCCT<br><b>Rev:</b> GTTGCACAAGCCACTGGA     | <b>20</b>                             | L-010086                              |
| <b>FOSL1</b> | <b>For:</b> AACCGGAGGAAGGAACTGAC<br><b>Rev:</b> CTGCAGCCCAGATTTCTCAT   | <b>4</b>                              | L-004341                              |
| <b>IER3</b>  | <b>For:</b> GGGTCGTAAGTTTAGGAGGTGA<br><b>Rev:</b> CGCCGAAGTCTCACACAGTA | <b>88</b>                             | L-011547                              |
| <b>IRF1</b>  | <b>For:</b> GAGCTGGGCCATTACACAC<br><b>Rev:</b> AGTTGGCCTTCCACGTCTT     | <b>36</b>                             | L-011704                              |
| <b>JUN</b>   | <b>For:</b> CCAAAGGATAGTGCGATGTTT<br><b>Rev:</b> CTGTCCCTCTCCACTGCAAC  | <b>19</b>                             | L-003268                              |
| <b>JUNB</b>  | <b>For:</b> CACAAGATGAACCACGTGACA<br><b>Rev:</b> GGAGTAGCTGCTGAGGTTGG  | <b>10</b>                             | L-003269                              |
| <b>RELA</b>  | <b>For:</b> TGACAAGGTGCAGAAAGAGG<br><b>Rev:</b> ACATCAGCTTGCGAAAAGGA   | <b>64</b>                             | L-003533                              |
